# Supplementary material for: Parabens Increase Sulfamethoxazole-, Tetracycline- and Paraben-Resistant Bacteria and Reshape the Nitrogen/Sulfur Cycle-Associated Microbial Communities in Freshwater River Sediments
Source: MDPI journal article supplement (doi:10.3390/toxics11040387), 2023-04-18
Supplement: s1 [file s1]

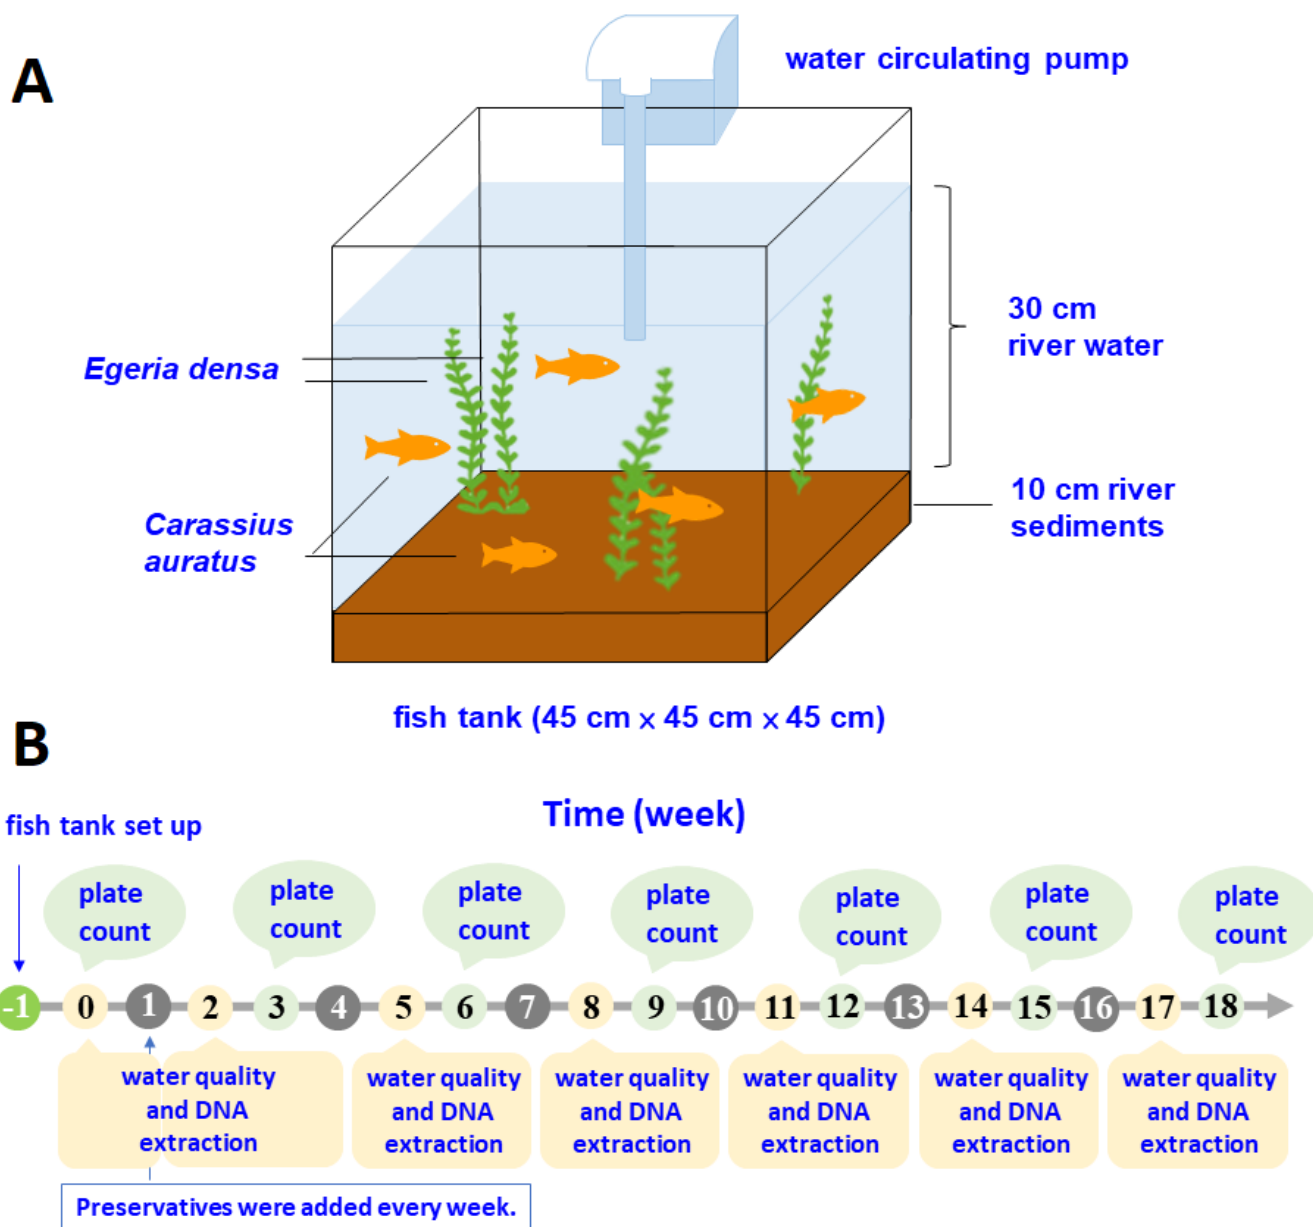

**Figure S1.** Experimental designs. (A) Compositions of fish tank. (B) Timeline of sampling and experiments in this study.

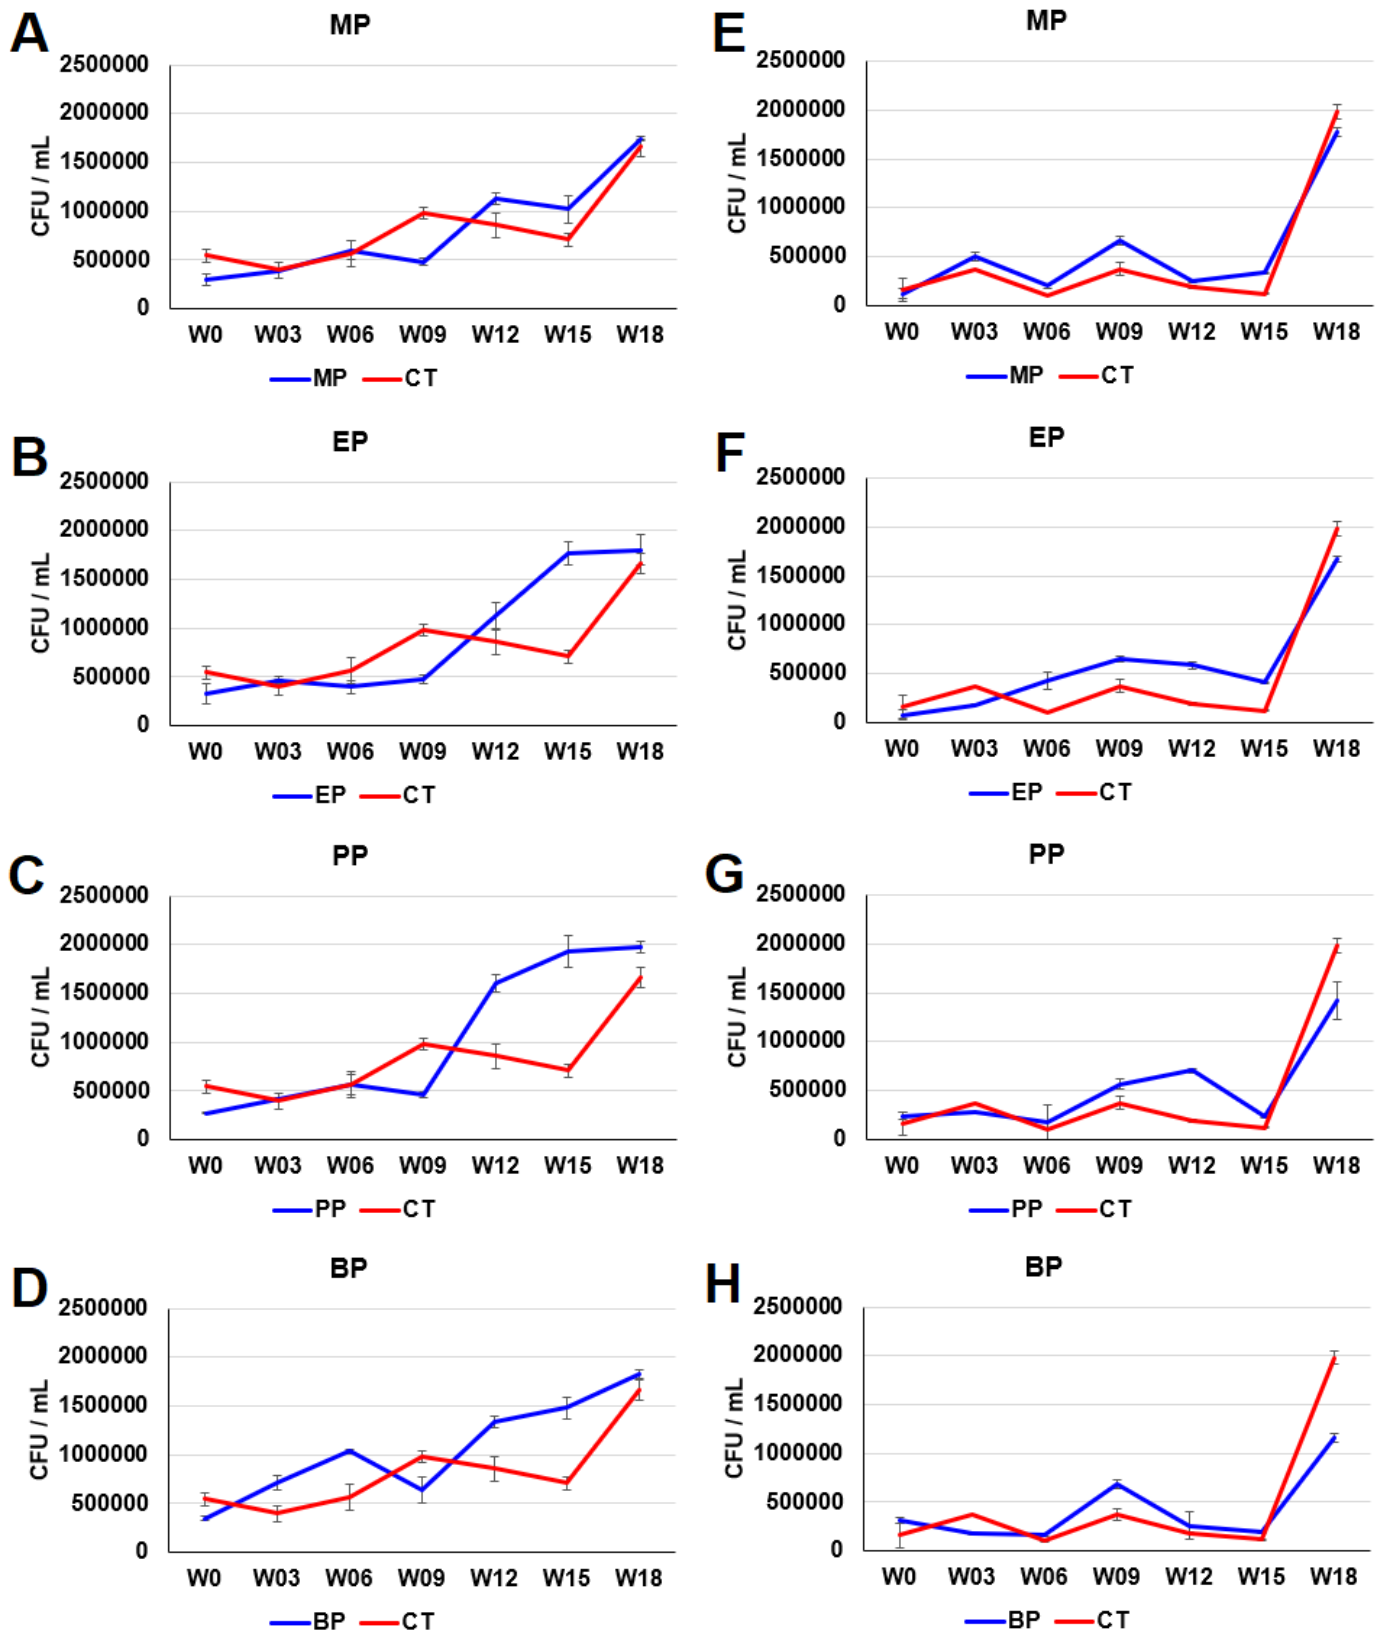

**Figure S2.** Total plate counts of bacteria in paraben treated river sediments. A-D: aerobic culture. E-H: anaerobic culture. Y-axis indicates colony forming unit per mL (CFU/mL). X-axis indicates weeks (0-18<sup>th</sup> week). Data from triplicate assays are presented as the mean  $\pm$  SE. MP: methylparaben, EP: ethylparaben, PP: propylparaben, BP: butylparaben, CT: control.

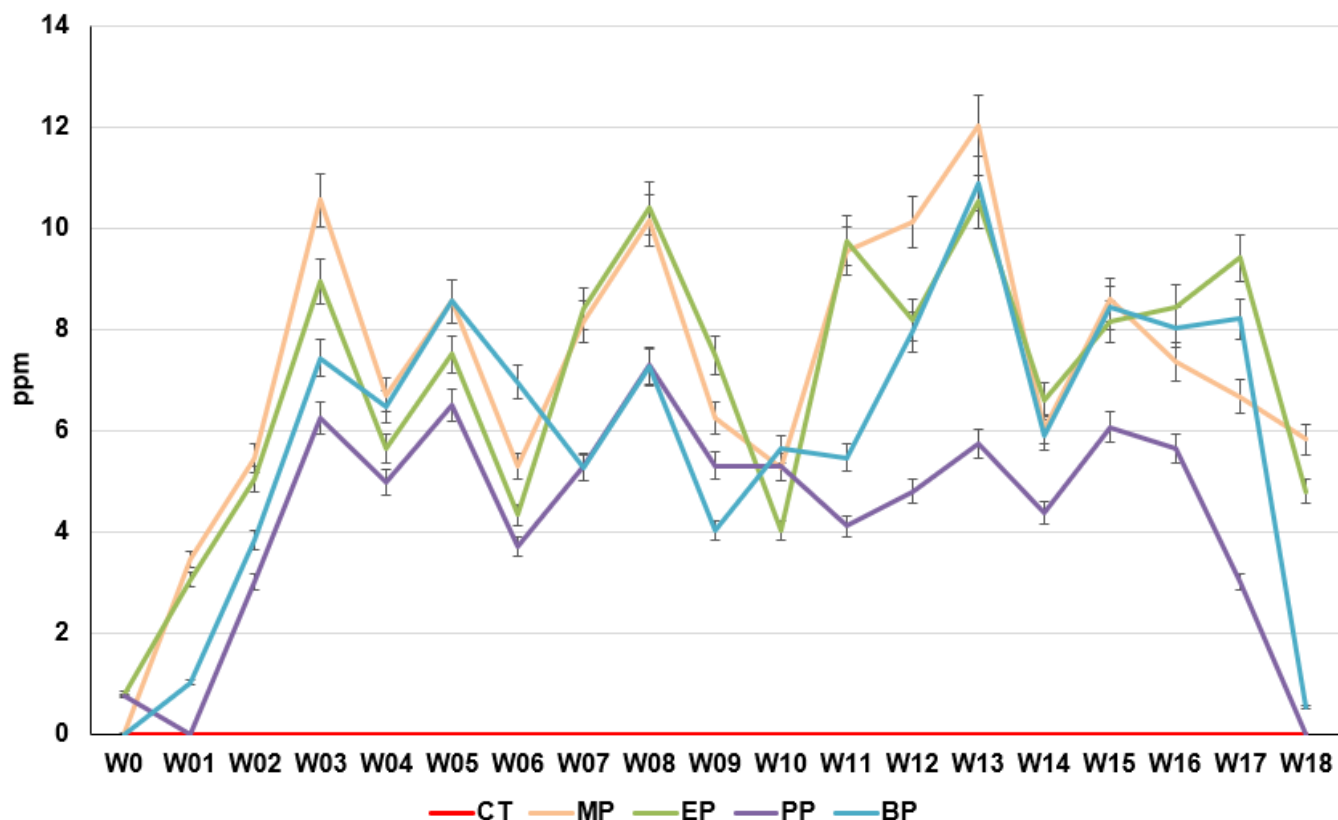

**Figure S3.** Residual parabens in each fish tank. Y-axis indicates residual paraben (parts per million, ppm). X-axis indicates weeks (0-18<sup>th</sup> week). Data from triplicate assays are presented as the mean  $\pm$  SE. MP: methylparaben, EP: ethylparaben, PP: propylparaben, BP: butylparaben, CT: control.

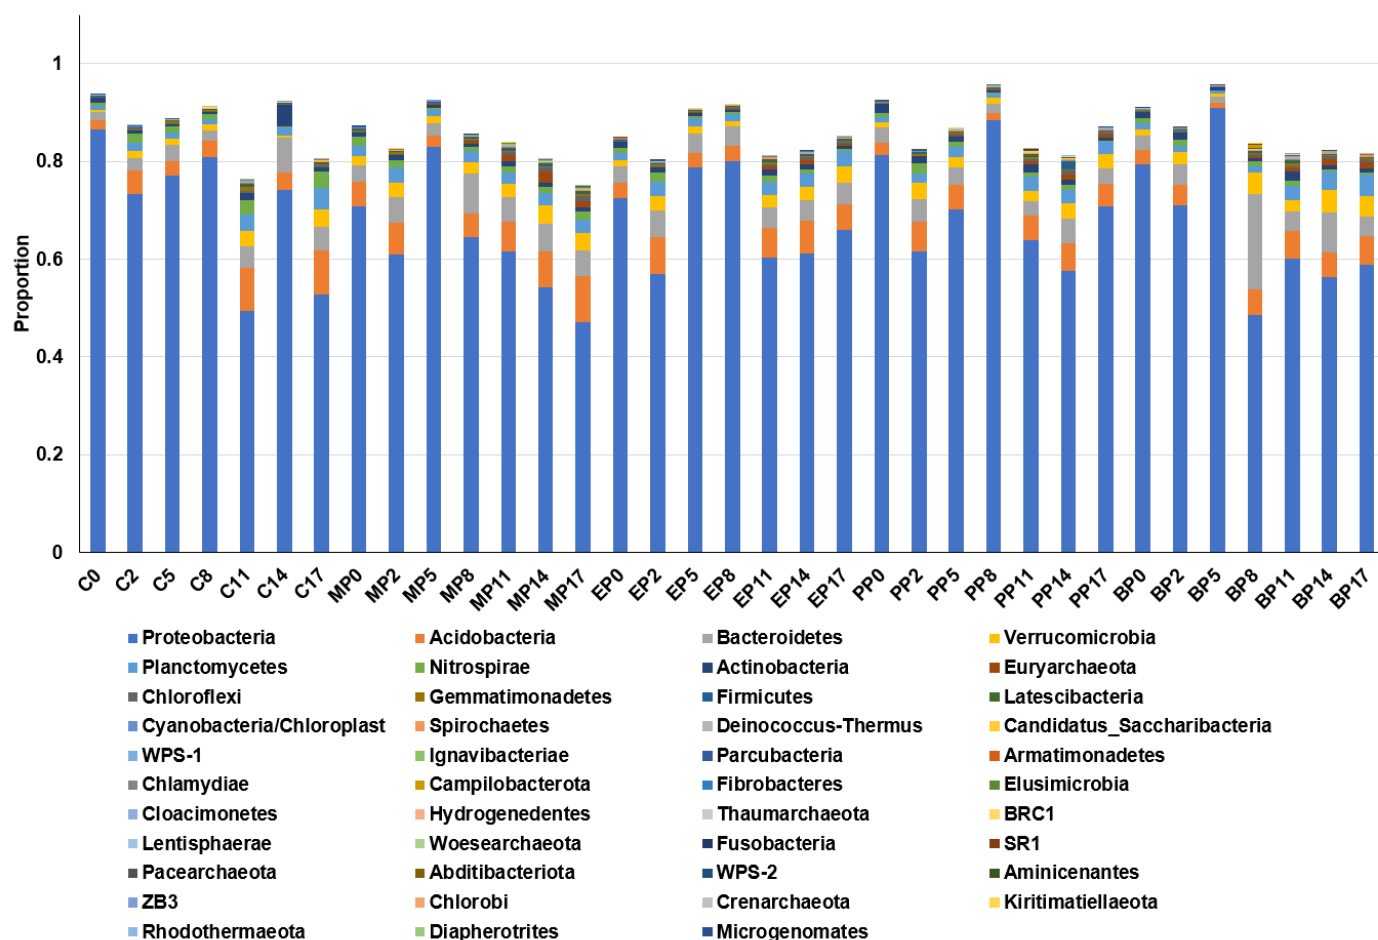

**Figure S4.** Microbial communities (phylum level) in the paraben treated river sediments. MP: methylparaben, EP: ethylparaben, PP: propylparaben, BP: butylparaben, C: control.

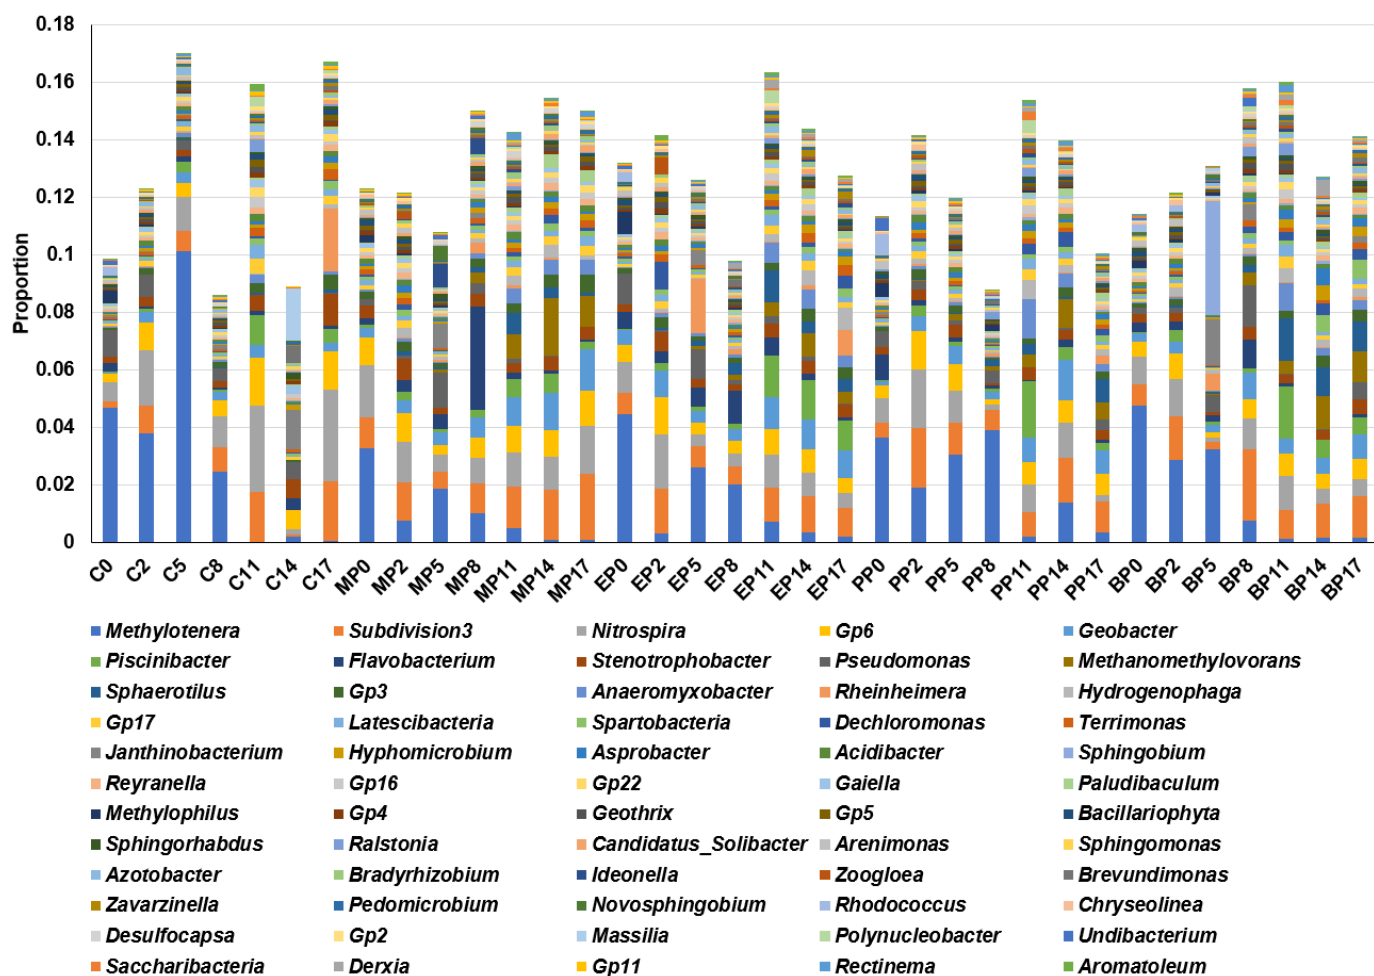

**Figure S5.** Microbial communities (genus level) in the paraben treated river sediments. MP: methylparaben, EP: ethylparaben, PP: propylparaben, BP: butylparaben, C: control.

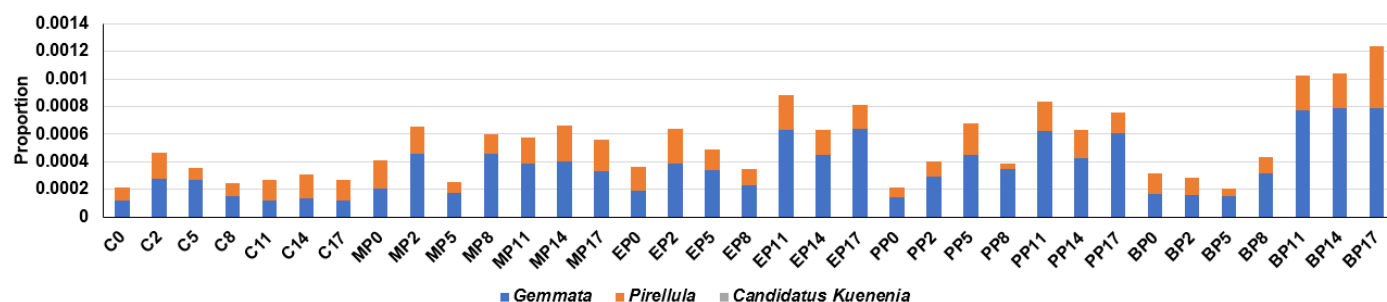

**Figure S6.** Anammox (anaerobic ammonium oxidation) associated microbial communities in the paraben treated river sediments. MP: methylparaben, EP: ethylparaben, PP: propylparaben, BP: butylparaben, C: control.

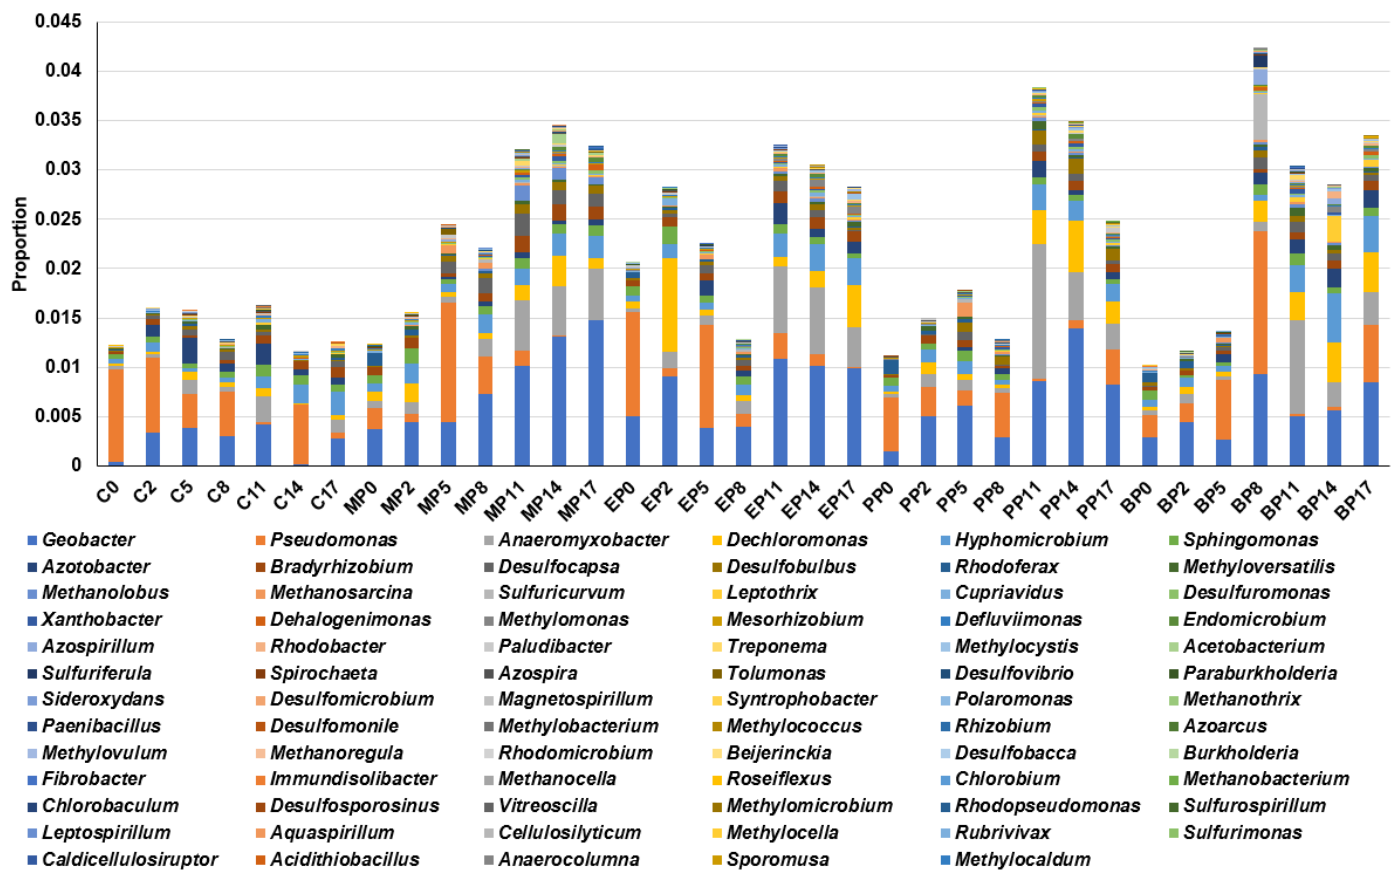

**Figure S7.** Nitrogen fixation (M00175: nitrogen  $\Rightarrow$  ammonia) associated microbial communities in the paraben treated river sediments. MP: methylparaben, EP: ethylparaben, PP: propylparaben, BP: butylparaben, C: control.

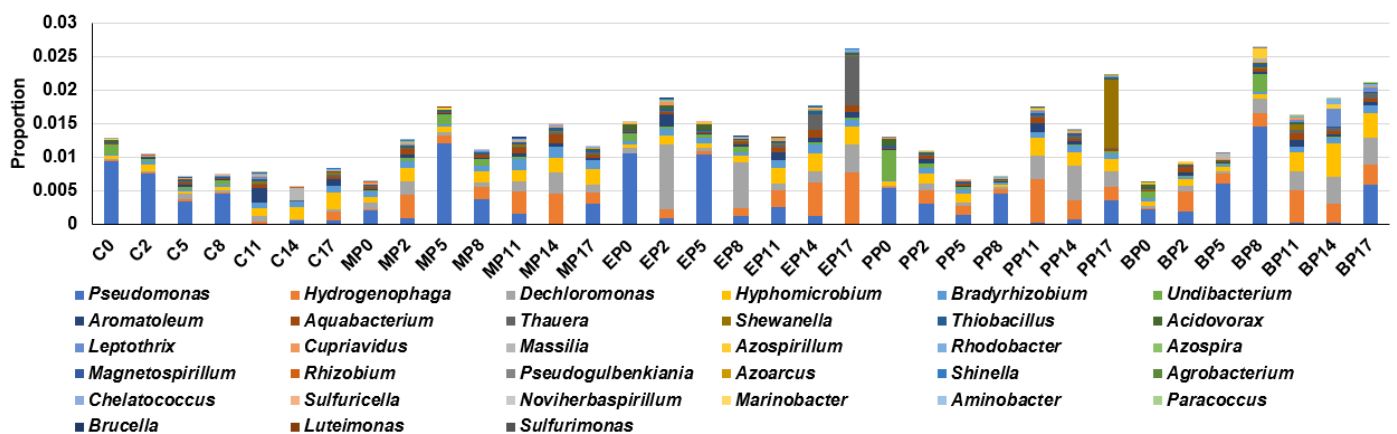

**Figure S8.** Denitrification (M00529: nitrate  $\Rightarrow$  nitrogen) associated microbial communities in the paraben treated river sediments. MP: methylparaben, EP: ethylparaben, PP: propylparaben, BP: butylparaben, C: control.

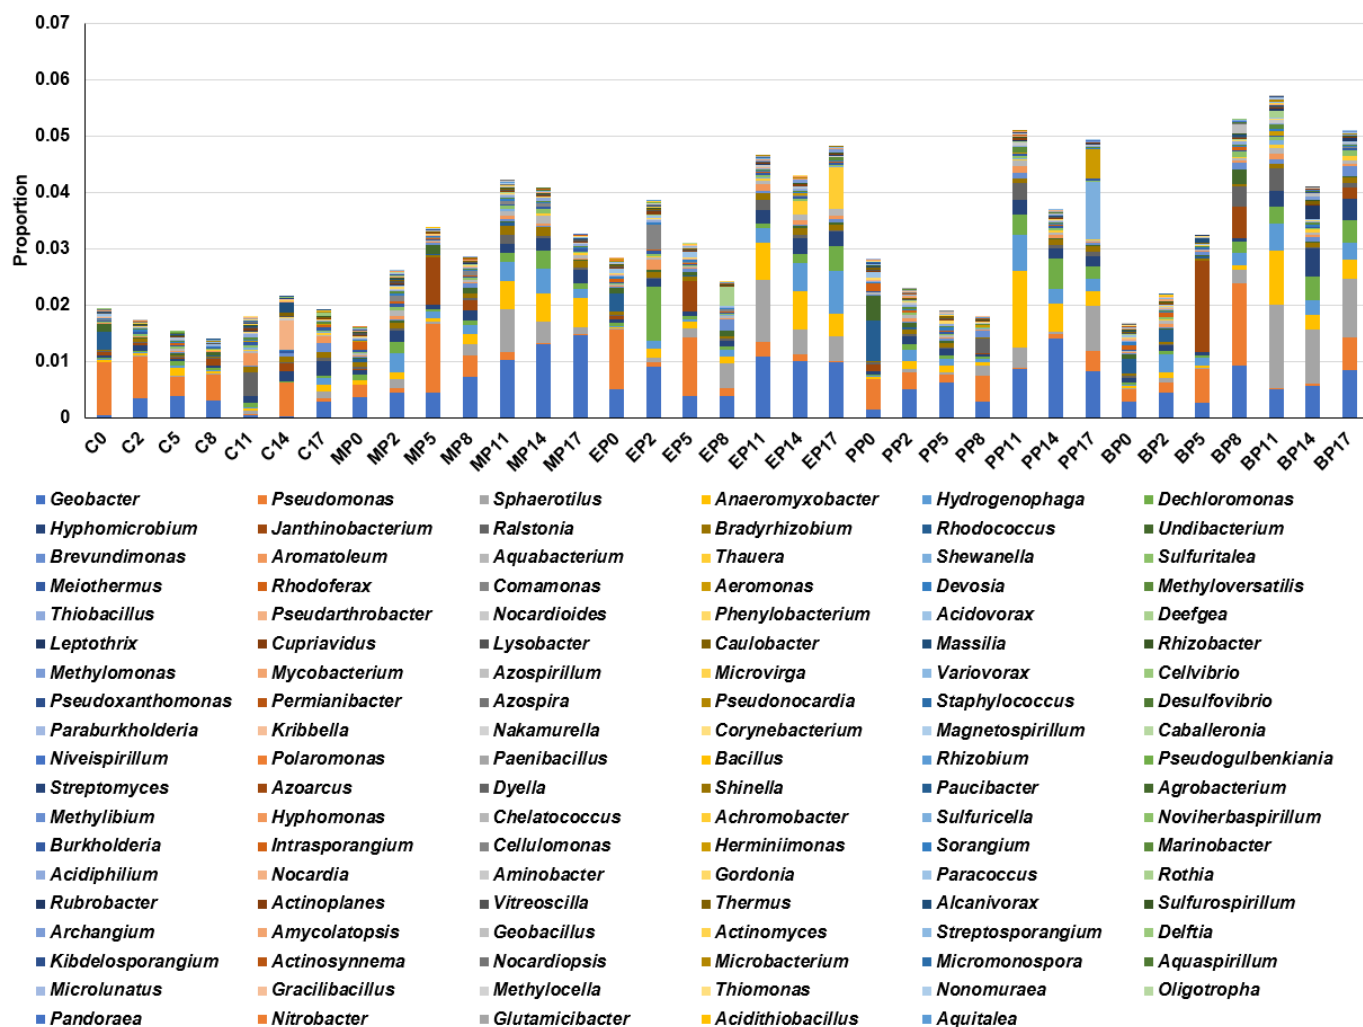

**Figure S9.** Dissimilatory nitrate reduction (M00530: nitrate  $\Rightarrow$  ammonia) associated microbial communities in the paraben treated river sediments. MP: methylparaben, EP: ethylparaben, PP: propylparaben, BP: butylparaben, C: control.

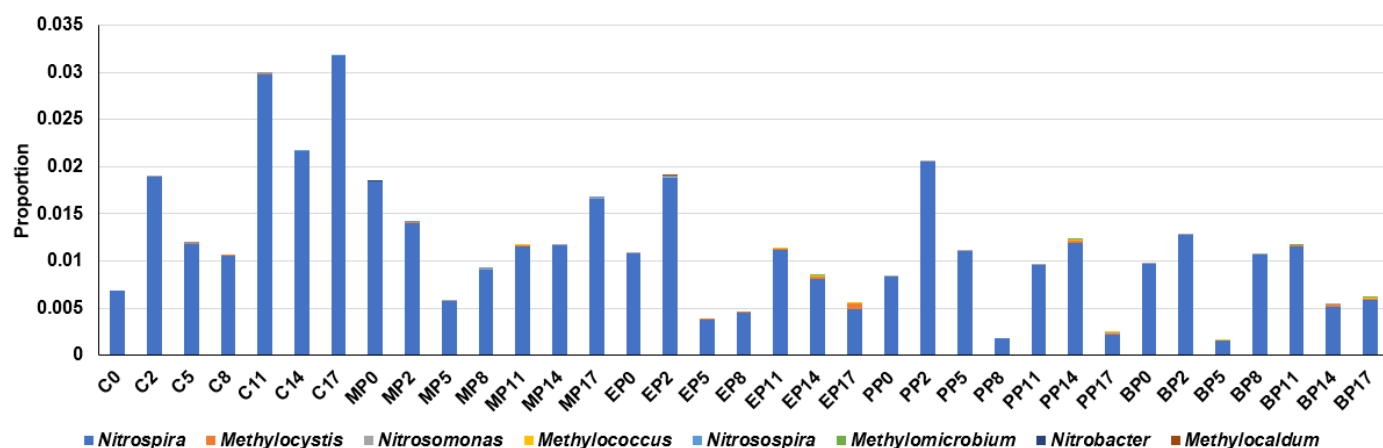

**Figure S10.** Nitrification (M00528: ammonia  $\Rightarrow$  nitrite) associated microbial communities in the paraben treated river sediments. MP: methylparaben, EP: ethylparaben, PP: propylparaben, BP: butylparaben, C: control.

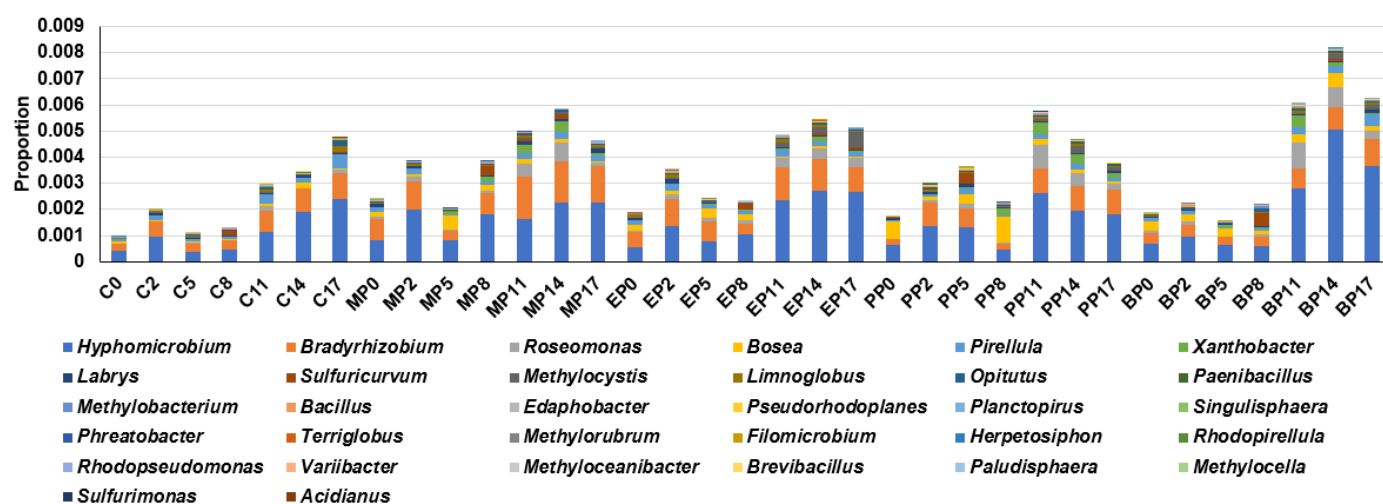

**Figure S11.** Assimilatory nitrate reduction (M00531: nitrate => ammonia) associated microbial communities in the paraben treated river sediments. MP: methylparaben, EP: ethylparaben, PP: propylparaben, BP: butylparaben, C: control.

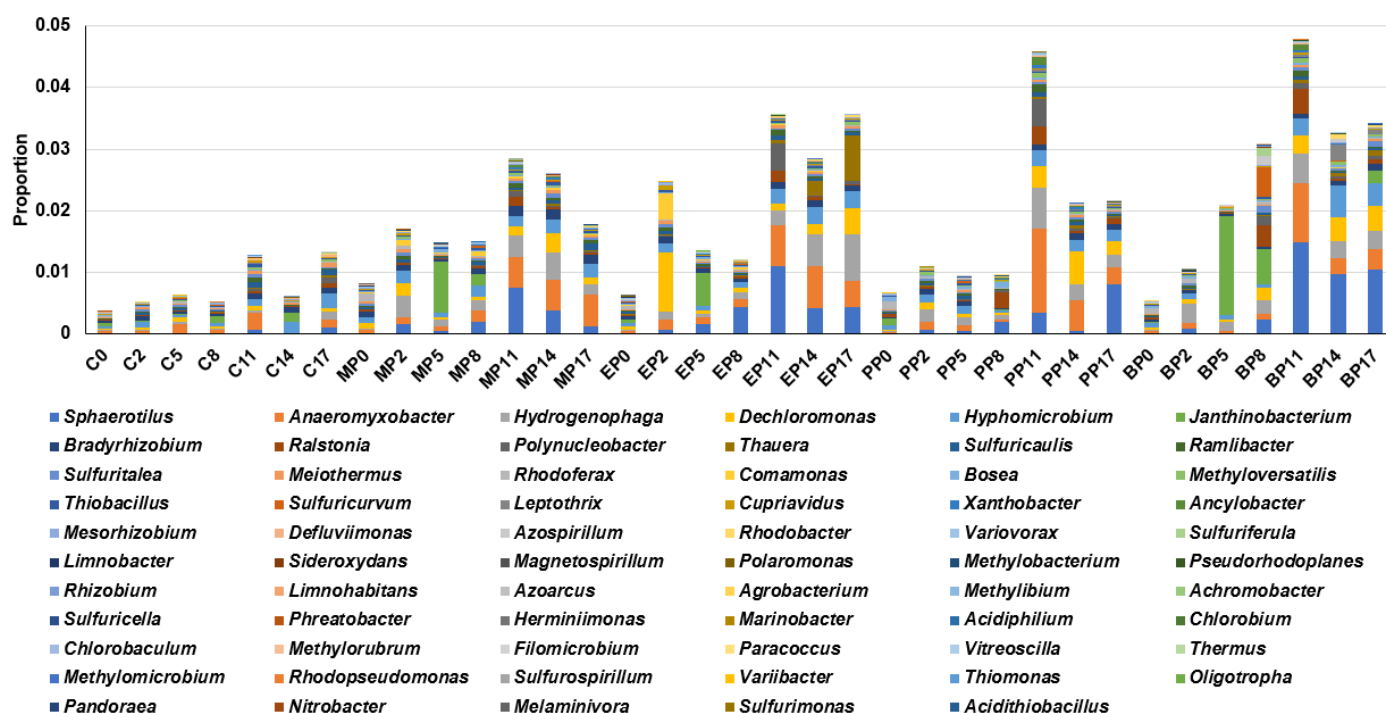

**Figure S12.** Thiosulfate oxidation (M00595: thiosulfate => sulfate) associated microbial communities in the paraben treated river sediments. MP: methylparaben, EP: ethylparaben, PP: propylparaben, BP: butylparaben, C: control.



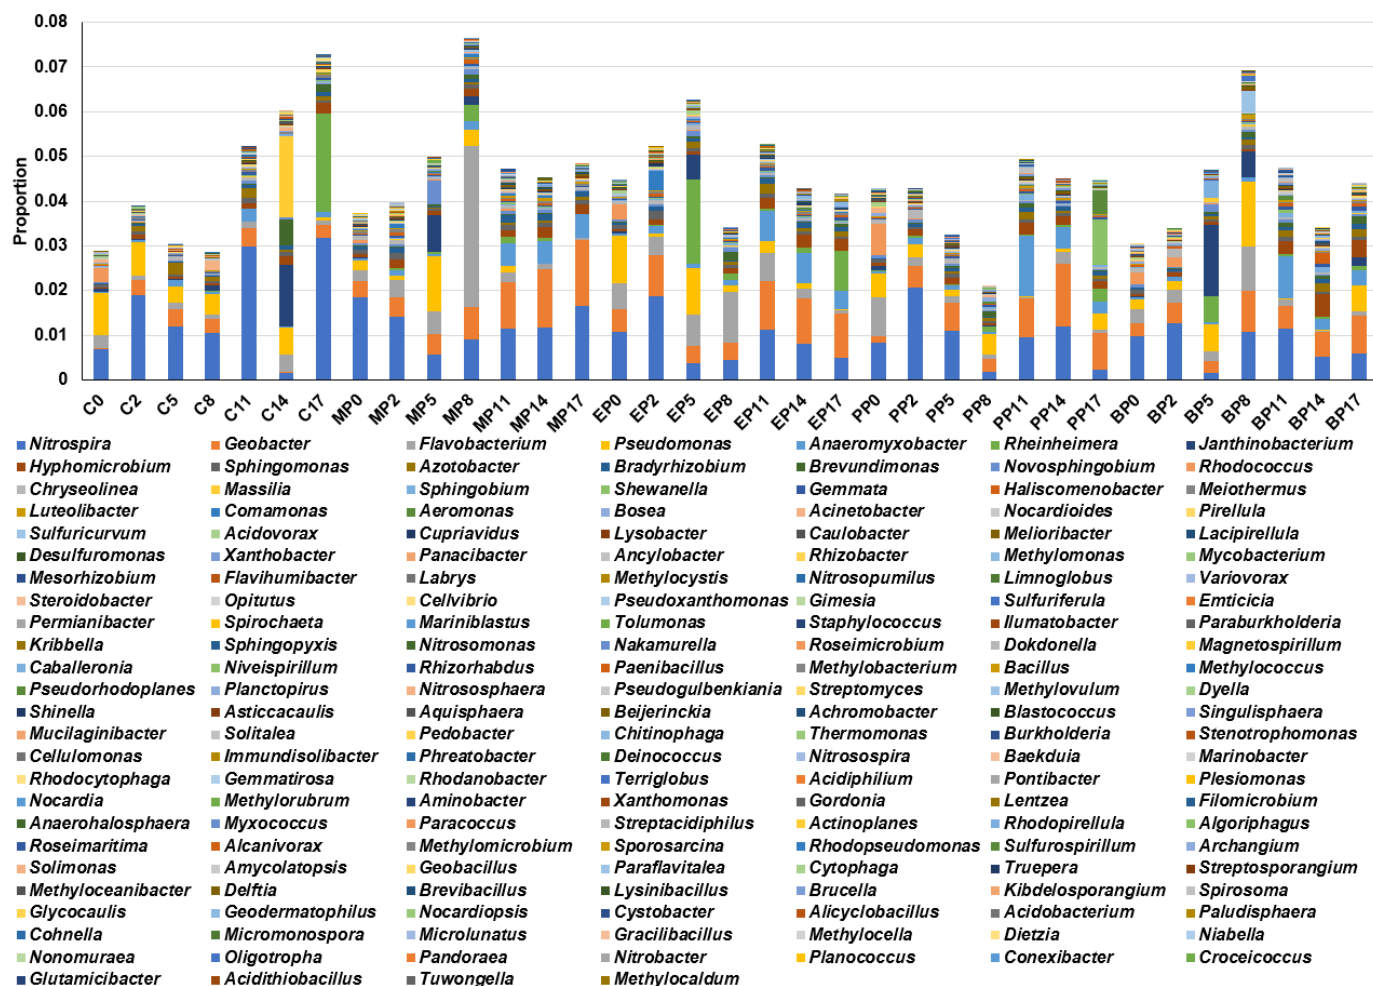

**Figure S13.** Assimilatory sulfate reduction (M00176: sulfate  $\Rightarrow$  H<sub>2</sub>S) associated microbial communities in the paraben treated river sediments. MP: methylparaben, EP: ethylparaben, PP: propylparaben, BP: butylparaben, C: control.



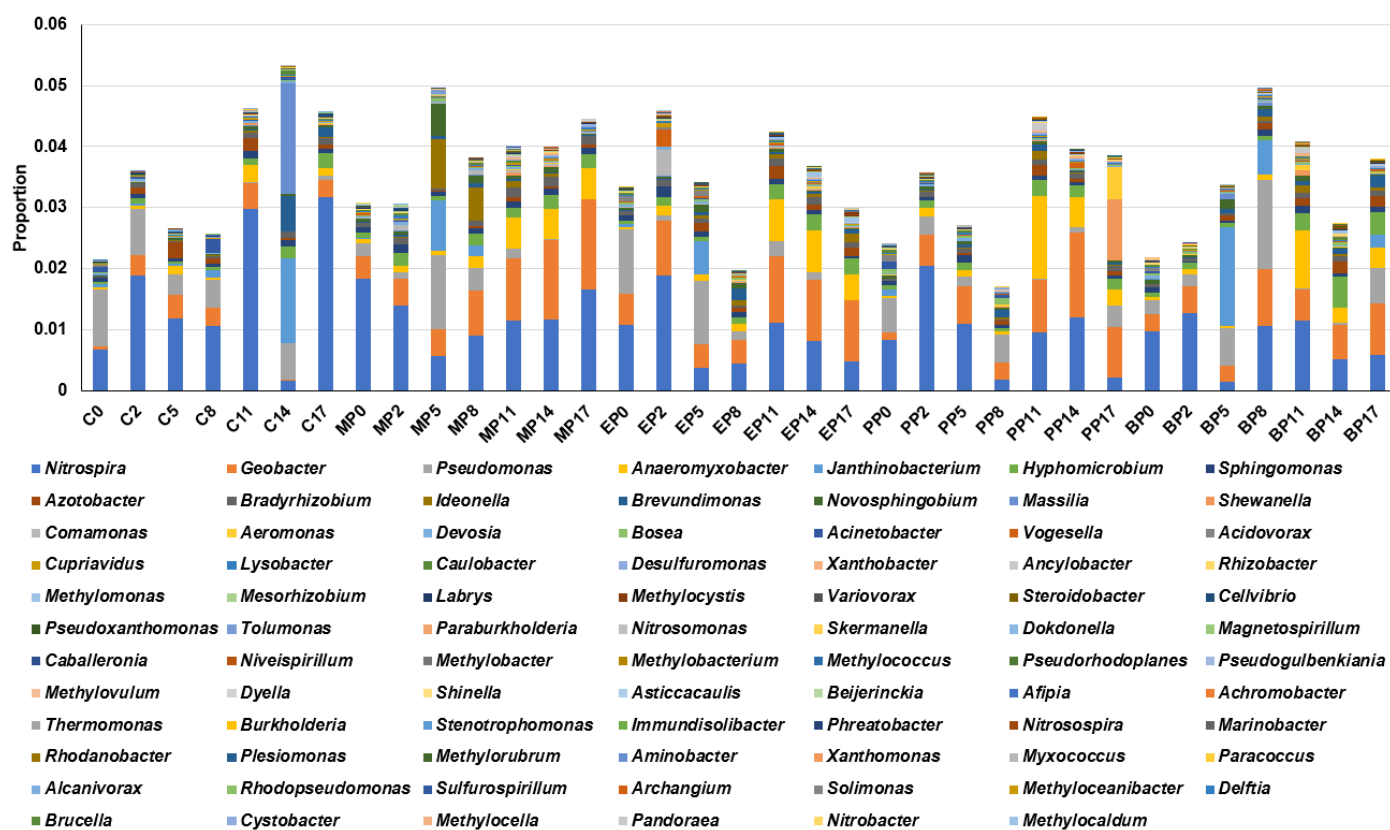

**Figure S14.** Sulfate-sulfur assimilation (M00616) associated microbial communities in the paraben treated river sediments. MP: methylparaben, EP: ethylparaben, PP: propylparaben, BP: butylparaben, C: control.

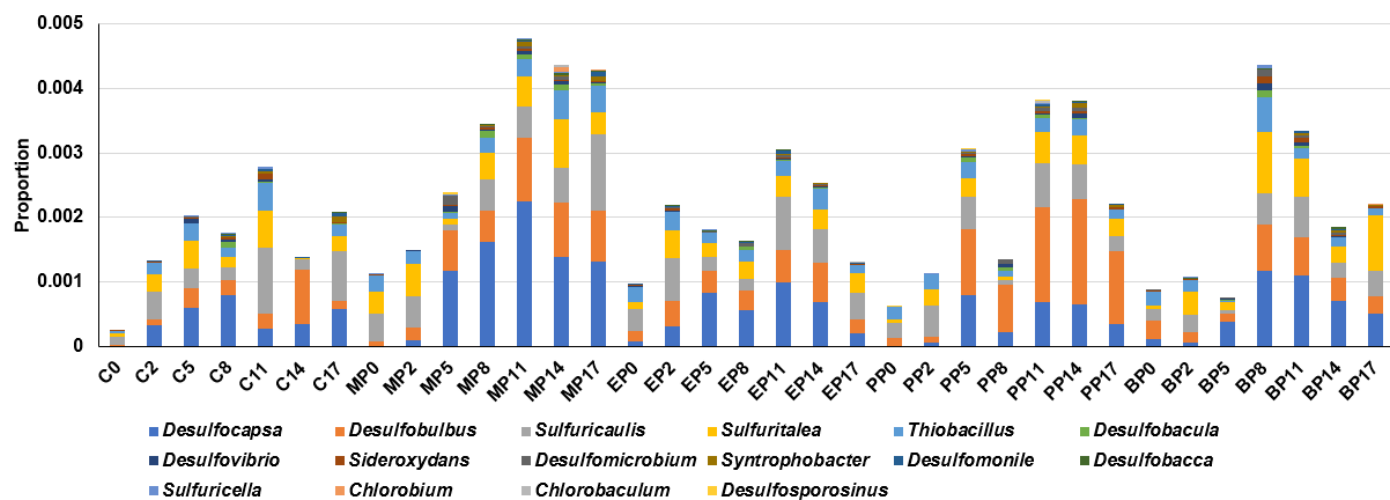

**Figure S15.** Dissimilatory sulfate reduction (M00596: sulfate => H<sub>2</sub>S) associated microbial communities in the paraben treated river sediments. MP: methylparaben, EP: ethylparaben, PP: propylparaben, BP: butylparaben, C: control.

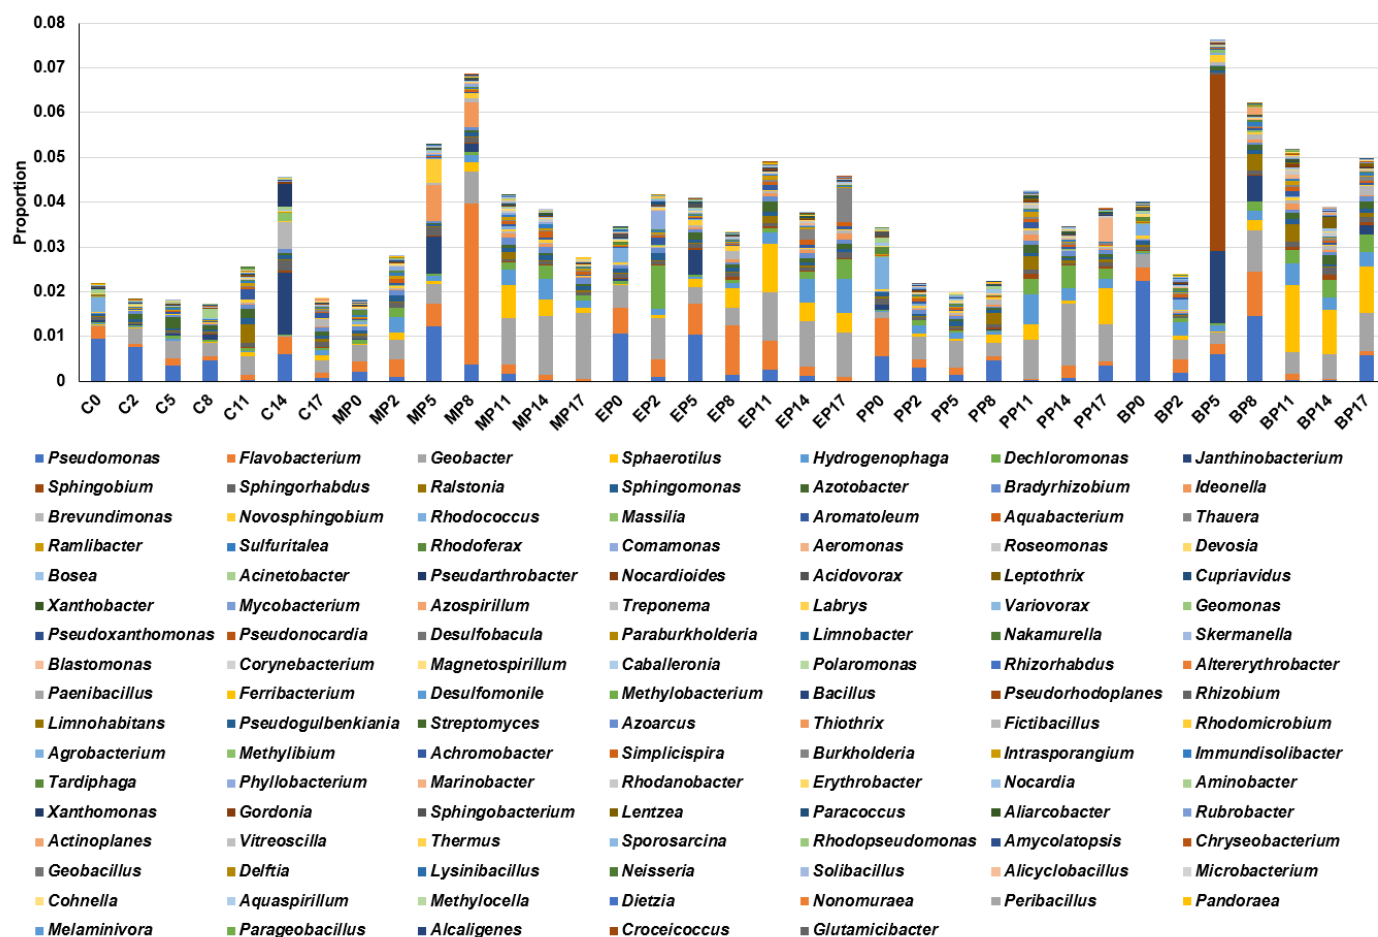

**Figure S16.** Microbial genera associated with xenobiotics degradation bacteria in the paraben treated river sediments. MP: methylparaben, EP: ethylparaben, PP: propylparaben, BP: butylparaben, C: control.

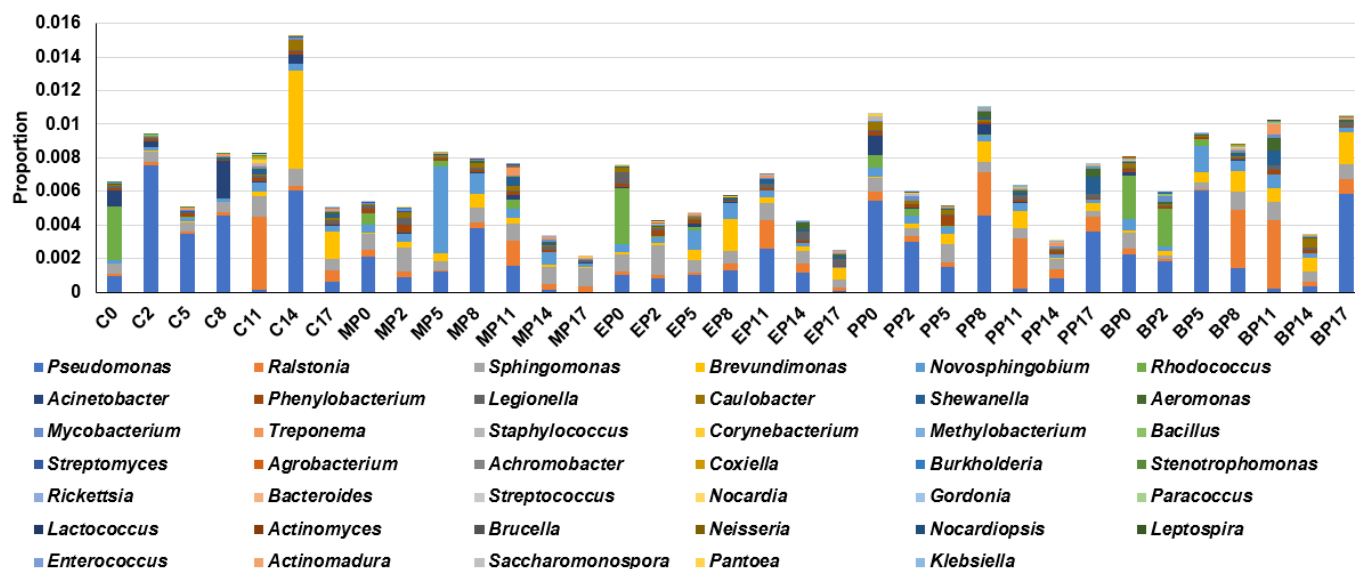

**Figure S17.** Proportions of microbial genera with potential pathogenic bacteria in the paraben treated river sediments. MP: methylparaben, EP: ethylparaben, PP: propylparaben, BP: butylparaben, C: control.

**Table S1.** Target compounds used in this study.

| Target Compounds | abbreviation | CAS No   | Formula                                                                             |
|------------------|--------------|----------|-------------------------------------------------------------------------------------|
| Methylparaben    | MP           | 99-76-3  | 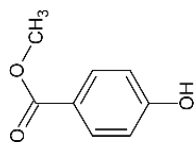  |
| Ethylparaben     | EP           | 120-47-8 |   |
| Propylparaben    | PP           | 94-13-3  |   |
| Butylparaben     | BP           | 94-26-8  |  |

**Table S2.** Antibiotics used in this study.

| Antibiotics      | abbreviation | CAS No   | Formula                                                                              |
|------------------|--------------|----------|--------------------------------------------------------------------------------------|
| Penicillin       | Pen          | 113-98-4 | 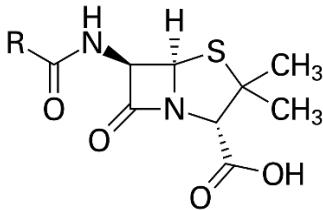 |
| Tetracycline     | Tet          | 60-54-8  |  |
| Sulfamethoxazole | Sul          | 723-46-6 |  |
