# Supplementary material for: Parabens Increase Sulfamethoxazole-, Tetracycline- and Paraben-Resistant Bacteria and Reshape the Nitrogen/Sulfur Cycle-Associated Microbial Communities in Freshwater River Sediments
Source: Toxics. 2023 Apr 18;11(4):387. doi: 10.3390/toxics11040387 (PMC10142436; doi:10.3390/toxics11040387)
Supplement: Supplementary file 1 [file toxics-11-00387-s001.zip › Microbial_communities.xlsx]

## Sheet: Anammox
	C0	C2	C5	C8	C11	C14	C17	MP0	MP2	MP5	MP8	MP11	MP14	MP17	EP0	EP2	EP5	EP8	EP11	EP14	EP17	PP0	PP2	PP5	PP8	PP11	PP14	PP17	BP0	BP2	BP5	BP8	BP11	BP14	BP17
Gemmata	0.000118147	0.000275084	0.000266916	0.000155066	0.000123713	0.000135969	0.000120011	0.000208808	0.000458403	0.000177575	0.000456786	0.000385241	0.0004012	0.000328491	0.000191309	0.000388972	0.000340668	0.000230884	0.000634548	0.000450911	0.000636053	0.000143668	0.000290706	0.000451321	0.000345963	0.000621189	0.000422557	0.000604715	0.000169363	0.0001623	0.000154845	0.000314207	0.000775996	0.000788544	0.000785897
Pirellula	9.84562e-05	0.00018912	8.89719e-05	8.86093e-05	0.000149142	0.000169961	0.000146909	0.000198367	0.000196459	7.47685e-05	0.000142746	0.000192621	0.000261652	0.000233122	0.000171171	0.000251687	0.000149042	0.000115442	0.000246242	0.000182099	0.000174603	7.18339e-05	0.000112531	0.000225661	4.15156e-05	0.000217416	0.000211278	0.000153927	0.000143308	0.000126233	5.16149e-05	0.000120849	0.000246348	0.000252334	0.000447148

## Sheet: M00175
	C0	C2	C5	C8	C11	C14	C17	MP0	MP2	MP5	MP8	MP11	MP14	MP17	EP0	EP2	EP5	EP8	EP11	EP14	EP17	PP0	PP2	PP5	PP8	PP11	PP14	PP17	BP0	BP2	BP5	BP8	BP11	BP14	BP17
Geobacter	0.000383979	0.00338697	0.00387028	0.00295734	0.0041897	0.000152965	0.00278834	0.00365413	0.00436138	0.00440199	0.00722293	0.01018	0.0130826	0.0147291	0.00505457	0.00906075	0.00385381	0.00389354	0.0108252	0.0101108	0.00990247	0.00139358	0.00500764	0.00614189	0.00285074	0.00863452	0.0139732	0.00818014	0.00287918	0.00440012	0.00259365	0.00924494	0.00500086	0.00559866	0.00844162
Pseudomonas	0.00939371	0.00753043	0.00344766	0.00459882	0.000174571	0.00606081	0.000618634	0.00215072	0.000929904	0.0121686	0.0038351	0.0015506	0.000156991	3.17894e-05	0.0105622	0.000854212	0.0103797	0.00132234	0.00261396	0.00118798	8.73014e-05	0.00546656	0.00301959	0.00151095	0.00454873	0.000207063	0.00083551	0.00358431	0.00222908	0.00187546	0.00608411	0.0145744	0.000197078	0.000346959	0.00588068
Anaeromyxobacter	0.00031506	0.000429819	0.00141243	0.000465199	0.00272331	1.69961e-05	0.0012821	0.000699505	0.00116565	0.000598148	0.00181763	0.00509482	0.00495395	0.00522406	0.00035241	0.00160927	0.00105394	0.00130134	0.00678114	0.0068157	0.00409069	0.000373536	0.00131287	0.00109887	0.000484349	0.0135937	0.00486901	0.00260577	0.00050809	0.000955764	0.000400015	0.000954706	0.00953366	0.0024918	0.00333329
Dechloromonas	0.000255986	0.000206313	0.000767383	0.000420894	0.000814664	6.79844e-05	0.000430354	0.000970955	0.00193839	0.000429919	0.000637597	0.0015506	0.00305261	0.00111263	0.000694752	0.009587	0.000489711	0.000682157	0.000975499	0.00164756	0.00430271	0.000229869	0.00110656	0.000510189	0.000318286	0.00348901	0.00521474	0.00225394	0.000390839	0.000775431	0.000400015	0.00211486	0.00284532	0.00402158	0.00401079
Hyphomicrobium	0.000433207	0.000945602	0.000367009	0.000465199	0.00112889	0.00188657	0.00242074	0.00084567	0.00201697	0.000803761	0.0017986	0.00162765	0.00226765	0.00226765	0.000563857	0.00136521	0.00077715	0.00103898	0.00236772	0.00270547	0.00265646	0.000632138	0.00136913	0.00130491	0.00047051	0.00264005	0.00195913	0.00183613	0.00070351	0.000973798	0.000645186	0.000592159	0.00282068	0.00506245	0.00367204
Sphingomonas	0.0005612	0.00061894	0.000556075	0.000642417	0.00126855	0.00103676	0.000645531	0.000908313	0.00147999	0.000551417	0.000875507	0.00101126	0.000976835	0.00105965	0.000966612	0.00174656	0.000745212	0.000766115	0.00098497	0.00069371	0.000498865	0.000833273	0.000515768	0.00113811	0.000595057	0.000652248	0.000633835	0.000406808	0.000924985	0.000234433	0.000387112	0.00105138	0.00112088	0.000630835	0.000880747
Azotobacter	0	0.0011863	0.00252458	0.000841788	0.0021414	0.000492887	0.000797949	0	0	0.000196267	0.000437753	0.000645279	0.000436087	0.000508631	0	0	0.00150107	0.000692652	0.00209306	0.000832452	0.00124716	0	0	0.000333585	0.000581218	0.00174968	0.000480178	0.000736652	0	0	0.00086455	0.00118432	0.00139187	0.00186096	0.00172084
Bradyrhizobium	0.000255986	0.000584554	0.000322523	0.000343361	0.000814664	0.000900794	0.000986229	0.000793469	0.00104778	0.000364496	0.000837441	0.00162765	0.00158736	0.00137754	0.000573926	0.00104488	0.000745212	0.000430284	0.00124068	0.00121399	0.000972787	0.000215502	0.000890873	0.000716227	0.000221417	0.000942136	0.000960356	0.000912569	0.000390839	0.000414766	0.000322593	0.000362547	0.000739044	0.000835857	0.0010298
Desulfocapsa	0	0.000326663	0.000600561	0.000797483	0.000279313	3.39922e-05	0.000573806	0	9.16806e-05	0.00116826	0.0016273	0.00225366	0.00139548	0.00132456	7.04821e-05	0.000312703	0.000830379	0.000566715	0.00098497	0.00069371	0.000212018	1.43668e-05	5.62656e-05	0.000794718	0.000221417	0.000683308	0.000643439	0.000340839	0.000117252	5.40999e-05	0.000387112	0.00117223	0.00109625	0.00070969	0.000501348
Desulfobulbus	1.96912e-05	8.59638e-05	0.000311402	0.000232599	0.000221123	8.49805e-05	0.000134486	8.3523e-05	0.000209556	0.000635532	0.000485335	0.000982366	0.000837287	0.000773543	0.000161102	0.000388972	0.000340668	0.000304347	0.000511427	0.000598325	0.000199546	0.000114934	9.37761e-05	0.00103019	0.000733442	0.0014805	0.00164221	0.00113247	0.000286615	0.0001623	0.000116134	0.000725093	0.000591235	0.00036273	0.000270999
Rhodoferax	0.000187067	1.71928e-05	0.000244673	3.32285e-05	6.98283e-05	1.69961e-05	0.000286903	0.00131549	0.000536987	0.000158883	0.000142746	6.74172e-05	3.4887e-05	2.1193e-05	0.000604132	0.000198299	0.000244855	0.000209894	3.78835e-05	4.33569e-05	7.48298e-05	0.00139358	0.000346972	0.000313963	8.30312e-05	5.17657e-05	3.84143e-05	6.59689e-05	0.000951041	0.000703298	2.58075e-05	0.000422971	0	0	0.0001084
Methyloversatilis	6.89193e-05	0.000154735	0.000189065	5.53808e-05	0.000488798	0	0.000304834	0	0.000366723	4.67303e-05	8.56474e-05	0.000317824	0.000244209	0.000127158	0	7.62689e-05	1.06459e-05	6.29683e-05	0.000151534	0.000225456	0.00053628	0	0.000450125	0.000176604	0.000110708	0.000817899	0.000230486	0.000208901	1.3028e-05	0.000252466	0.000116134	0.000181273	0.000837583	0.000394272	0.000311649
Methanolobus	0	0	0	0	0	0	0	0	0	6.54224e-05	0.000237909	0.00147355	0.00116871	0.000762946	0	0	0	9.44525e-05	0.000340951	0.000398883	0.000112245	0	0	7.84906e-05	8.30312e-05	0.00036236	0.000288107	0.000120943	0	0	0.000129037	0.000241698	0.00033257	0.000331188	0.000149049
Methanosarcina	0	3.43855e-05	0	1.10762e-05	2.32761e-05	0	2.68971e-05	1.04404e-05	0.000117875	0.000813107	0.000561466	0.000327455	8.72174e-05	8.47718e-05	0	0.000198299	0.000468419	0.000157421	0.000293597	9.53851e-05	4.98865e-05	0	0	0.00139321	0.000290609	0.00019671	6.7225e-05	1.09948e-05	0	1.80333e-05	0.00055486	0.000253783	0.000320252	4.73126e-05	6.77498e-05
Sulfuricurvum	0	0	2.2243e-05	0.000166142	0	0	3.58629e-05	0	0	0	0.000361622	7.70483e-05	0.000191878	1.05965e-05	4.02755e-05	1.52538e-05	1.06459e-05	0.000220389	2.84126e-05	6.06996e-05	6.23581e-05	0	0	0.000402264	0	1.03531e-05	1.92071e-05	2.19896e-05	0	0	0	0.0046406	0	6.30835e-05	1.355e-05
Leptothrix	0	0	5.56075e-05	1.10762e-05	0.000232761	0	5.37943e-05	1.04404e-05	7.85834e-05	3.73842e-05	6.66146e-05	4.81552e-05	6.97739e-05	4.23859e-05	1.00689e-05	7.62689e-06	4.25835e-05	6.29683e-05	5.68252e-05	9.53851e-05	0.000187074	0	3.75104e-05	0	2.76771e-05	0.000310594	5.76214e-05	0.000186912	2.60559e-05	5.40999e-05	1.29037e-05	7.25093e-05	0.000394157	0.00255488	0.000718147
Cupriavidus	5.90737e-05	6.87711e-05	0.000122336	4.43046e-05	0.000267675	0.000118973	0.000107589	0.000198367	0.000222653	6.54224e-05	7.6131e-05	0.00018299	0.000156991	0.000190737	0.000100689	0.000648286	0.000223564	0.000157421	0.000255713	0.000277484	0.000112245	7.18339e-05	9.37761e-05	0.000137359	8.30312e-05	0.000269182	0.000172864	0.000109948	6.51398e-05	0.000126233	5.16149e-05	0.000145019	0.000295617	0.000110396	8.12997e-05
Desulfuromonas	0	0	3.33645e-05	4.43046e-05	8.14664e-05	0	1.79314e-05	3.13211e-05	2.61945e-05	5.60763e-05	7.6131e-05	0.000202252	0.000261652	0.000275508	4.02755e-05	7.62689e-05	8.51671e-05	4.19789e-05	0.000198888	0.00025147	0.000112245	1.43668e-05	4.6888e-05	5.8868e-05	4.15156e-05	0.000279535	0.000307314	0.000230891	0	1.80333e-05	0	0.000145019	0.000135491	9.46253e-05	0.000311649
Xanthobacter	0	0	0	0	0	0	0	0	1.30972e-05	8.41145e-05	0.000152262	0.000327455	0.0004012	9.53683e-05	0	0	3.19377e-05	4.19789e-05	2.84126e-05	0.00019077	3.74149e-05	1.43668e-05	0	7.84906e-05	0.000304448	0.000424479	0.000364935	0.000175917	0	0	0.00010323	3.62547e-05	0.000443426	0.000126167	5.41998e-05
Dehalogenimonas	0	1.71928e-05	3.33645e-05	4.43046e-05	1.16381e-05	6.79844e-05	7.17257e-05	0	0	9.34606e-06	2.85491e-05	0.000173359	0.000279096	0.000529824	0	1.52538e-05	9.5813e-05	2.09894e-05	0.000170476	0.000173427	8.73014e-05	0	0	7.84906e-05	6.91927e-05	0.000134591	0.000240089	0.000131938	0	0	2.58075e-05	0.000350462	0.000160126	0.000110396	0.000338749
Methylomonas	0	1.71928e-05	0	1.10762e-05	0	0	2.68971e-05	1.04404e-05	1.30972e-05	9.34606e-06	2.85491e-05	1.92621e-05	6.97739e-05	5.29824e-05	3.02066e-05	1.52538e-05	1.06459e-05	2.09894e-05	0.000255713	0.000702381	0.000773241	1.43668e-05	9.37761e-06	0	1.38385e-05	0.000124238	0.000153657	3.29844e-05	2.60559e-05	1.80333e-05	1.29037e-05	0	4.92696e-05	0.000488897	0.000230349
Mesorhizobium	4.92281e-05	3.43855e-05	6.67289e-05	8.86093e-05	0.000104743	0.000220949	6.276e-05	0.000114844	0.000183361	4.67303e-05	5.70983e-05	0.000202252	0.000122104	0.000148351	0.000110758	0.000198299	8.51671e-05	0.000115442	0.000123121	7.80424e-05	7.48298e-05	0.000129301	0.000140664	6.86793e-05	0	0.000144944	2.88107e-05	4.39792e-05	3.90839e-05	5.40999e-05	2.58075e-05	3.62547e-05	7.39044e-05	7.88544e-05	4.06499e-05
Defluviimonas	4.92281e-05	3.43855e-05	6.67289e-05	2.21523e-05	0.000221123	0.000101977	0.000233109	7.30826e-05	0.000104778	7.47685e-05	4.75819e-05	3.85241e-05	0.000122104	0.000105965	8.0551e-05	7.62689e-05	5.32294e-05	3.14842e-05	0.000123121	0.000173427	0.000137188	2.87336e-05	4.6888e-05	7.84906e-05	8.30312e-05	0.000186357	4.80178e-05	0.000120943	7.81677e-05	1.80333e-05	5.16149e-05	8.45942e-05	0.000197078	6.30835e-05	9.48497e-05
Endomicrobium	0	0	0	2.21523e-05	0	0	0	0	0	0	7.6131e-05	0.000144466	0.00034887	0.000455648	0	0	1.06459e-05	0.000136431	0.000179946	0.000338184	9.9773e-05	0	0	0	0	0.000176003	0.000384143	0.000142933	0	0	0	8.45942e-05	0.000123174	0.000189251	0.000216799
Azospirillum	9.84562e-06	1.71928e-05	1.11215e-05	0	1.16381e-05	0	0	0	1.30972e-05	0.000205613	2.85491e-05	0.000144466	1.74435e-05	0	9.06198e-05	0	2.12918e-05	0	9.47086e-06	3.46855e-05	1.24716e-05	0	0	0	1.38385e-05	5.17657e-05	3.84143e-05	0	6.51398e-05	7.21332e-05	5.16149e-05	0.00152269	3.69522e-05	0.000583523	2.70999e-05
Rhodobacter	2.95369e-05	1.71928e-05	1.11215e-05	2.21523e-05	8.14664e-05	3.39922e-05	0.00018828	1.04404e-05	7.85834e-05	4.67303e-05	7.6131e-05	7.70483e-05	6.97739e-05	0.000116561	3.02066e-05	3.81345e-05	1.06459e-05	6.29683e-05	0.000104179	0.000130071	0.000199546	2.87336e-05	2.81328e-05	9.81133e-06	8.30312e-05	0.000134591	7.68285e-05	4.39792e-05	5.21118e-05	3.60666e-05	0	2.41698e-05	0.000160126	0.000646606	0.000257449
Paludibacter	1.96912e-05	5.15783e-05	5.56075e-05	4.43046e-05	6.98283e-05	0	8.96572e-06	8.3523e-05	7.85834e-05	0.00035515	2.85491e-05	0.000125203	0.000191878	0	0.00018124	0.000167792	7.45212e-05	6.29683e-05	0	1.73427e-05	0	2.87336e-05	3.75104e-05	9.81133e-06	5.53541e-05	1.03531e-05	4.80178e-05	0.00057173	0.000104224	3.60666e-05	1.29037e-05	7.25093e-05	9.85392e-05	0	0.0001084
Treponema	0	0	0.000166822	0.000121838	6.98283e-05	0	0.000107589	0	0	9.34606e-06	2.85491e-05	0.000433397	0.000104661	8.47718e-05	0	0	7.45212e-05	0	0.000161005	1.73427e-05	0.000124716	0	0	1.96227e-05	2.76771e-05	6.21189e-05	0.000220882	4.39792e-05	0	1.80333e-05	0	0.000120849	0.000554283	6.30835e-05	2.70999e-05
Methylocystis	0	3.43855e-05	3.33645e-05	1.10762e-05	3.49142e-05	0	0	0	1.30972e-05	0	0	6.74172e-05	6.97739e-05	4.23859e-05	0	3.81345e-05	2.12918e-05	4.19789e-05	0.000161005	0.000225456	0.000586166	0	2.81328e-05	0	0	8.28252e-05	0.000230486	0.000142933	0	0	1.29037e-05	1.20849e-05	4.92696e-05	0.000189251	0.000162599
Acetobacterium	0	0	0	0	0	0	0	0	0	0	4.75819e-05	0.000250407	0.000924505	0.000254315	0	0	0	0	0	0	0	0	9.37761e-06	0	0	0	0	0	0	0	0	0	0	0	0
Sulfuriferula	9.84562e-06	0	0	0	0	0	0	0	0	0	0	0	0	0	0	0	4.25835e-05	0	0	0	0	0	0	1.96227e-05	0	0	0	0	0	0	0	0.00123266	0	0	0
Spirochaeta	0	0	0.000100093	1.10762e-05	4.65522e-05	0	1.79314e-05	3.13211e-05	0.00014407	0	1.90328e-05	8.66793e-05	3.4887e-05	1.05965e-05	1.00689e-05	9.15227e-05	2.12918e-05	0	3.78835e-05	8.67137e-06	0	1.43668e-05	4.6888e-05	3.92453e-05	1.38385e-05	1.03531e-05	0	0	1.3028e-05	9.01664e-05	2.58075e-05	7.25093e-05	0.000123174	3.15418e-05	0
Azospira	1.96912e-05	8.59638e-05	4.4486e-05	4.43046e-05	0.000104743	0	1.79314e-05	4.17615e-05	2.61945e-05	0	1.90328e-05	4.81552e-05	0.000104661	0	3.02066e-05	0.000114403	3.19377e-05	3.14842e-05	3.78835e-05	1.73427e-05	1.24716e-05	2.87336e-05	3.75104e-05	2.9434e-05	1.38385e-05	2.07063e-05	9.60356e-06	1.09948e-05	0	1.80333e-05	0	6.04244e-05	2.46348e-05	0	2.70999e-05
Tolumonas	0	0	1.11215e-05	0	0	0	8.96572e-06	4.17615e-05	1.30972e-05	0.00066357	9.51638e-06	9.63104e-06	0	1.05965e-05	2.01377e-05	2.28807e-05	1.06459e-05	0	0	0	0	0	0	0	1.38385e-05	0	9.60356e-06	0	2.60559e-05	0	7.74224e-05	1.20849e-05	0	0	0
Desulfovibrio	0	0	6.67289e-05	4.43046e-05	4.65522e-05	0	8.96572e-06	0	1.30972e-05	8.41145e-05	1.90328e-05	5.77862e-05	5.23304e-05	2.1193e-05	2.01377e-05	1.52538e-05	1.06459e-05	0	2.84126e-05	8.67137e-06	0	0	0	1.96227e-05	6.91927e-05	1.03531e-05	6.7225e-05	0	0	0	1.29037e-05	9.66791e-05	4.92696e-05	1.57709e-05	0
Paraburkholderia	0	0	1.11215e-05	0	5.81903e-05	5.09883e-05	8.96572e-06	5.22019e-05	5.23889e-05	9.34606e-06	1.90328e-05	1.92621e-05	5.23304e-05	3.17894e-05	6.04132e-05	6.8642e-05	4.25835e-05	2.09894e-05	9.47086e-06	1.73427e-05	1.24716e-05	2.87336e-05	0	9.81133e-06	0	3.10594e-05	0	0	2.60559e-05	0	1.29037e-05	1.20849e-05	9.85392e-05	1.57709e-05	0
Sideroxydans	9.84562e-06	1.71928e-05	2.2243e-05	3.32285e-05	8.14664e-05	0	1.79314e-05	1.04404e-05	0	1.86921e-05	1.90328e-05	3.85241e-05	1.74435e-05	1.05965e-05	1.00689e-05	4.57614e-05	0	0	1.89417e-05	1.73427e-05	1.24716e-05	0	0	3.92453e-05	0	5.17657e-05	2.88107e-05	3.29844e-05	1.3028e-05	1.80333e-05	0	0.000120849	6.1587e-05	3.15418e-05	2.70999e-05
Desulfomicrobium	0	0	1.11215e-05	0	0	0	0	0	0	0.000140191	2.85491e-05	2.88931e-05	5.23304e-05	1.05965e-05	0	1.52538e-05	2.12918e-05	5.24736e-05	2.84126e-05	2.60141e-05	0	0	0	9.81133e-06	6.91927e-05	4.14126e-05	6.7225e-05	0	1.3028e-05	0	2.58075e-05	9.66791e-05	4.92696e-05	3.15418e-05	0
Magnetospirillum	0	0	5.56075e-05	0	1.16381e-05	0	8.96572e-06	0	9.16806e-05	6.54224e-05	2.85491e-05	9.63104e-05	0	2.1193e-05	0	2.28807e-05	0	0	2.84126e-05	2.60141e-05	3.74149e-05	0	9.37761e-06	9.81133e-06	0	1.03531e-05	0	0	0	0	0	1.20849e-05	3.69522e-05	0	4.06499e-05
Syntrophobacter	0	0	0	2.21523e-05	3.49142e-05	0	8.06914e-05	0	0	0	9.51638e-06	7.70483e-05	1.74435e-05	6.35789e-05	0	0	0	0	2.84126e-05	1.73427e-05	0	0	0	9.81133e-06	0	3.10594e-05	6.7225e-05	4.39792e-05	0	0	0	1.20849e-05	3.69522e-05	3.15418e-05	2.70999e-05
Polaromonas	3.93825e-05	3.43855e-05	1.11215e-05	3.32285e-05	0	5.09883e-05	0	1.04404e-05	0	0	1.90328e-05	4.81552e-05	0	1.05965e-05	9.06198e-05	0	2.12918e-05	3.14842e-05	0	0	0	2.87336e-05	0	0	4.15156e-05	1.03531e-05	0	2.19896e-05	1.3028e-05	0	0	1.20849e-05	0	1.57709e-05	2.70999e-05
Methanothrix	0	0	0	0	0	1.69961e-05	2.68971e-05	1.04404e-05	1.30972e-05	0	0	3.85241e-05	6.97739e-05	5.29824e-05	0	1.52538e-05	2.12918e-05	0	1.89417e-05	1.73427e-05	2.49433e-05	0	0	9.81133e-06	0	0	7.68285e-05	1.09948e-05	0	0	1.29037e-05	6.04244e-05	2.46348e-05	3.15418e-05	0
Paenibacillus	0	0	0	3.32285e-05	2.32761e-05	3.39922e-05	8.96572e-06	0	0	9.34606e-06	0	1.92621e-05	0	1.05965e-05	1.00689e-05	7.62689e-06	0	2.09894e-05	1.89417e-05	2.60141e-05	1.24716e-05	0	4.6888e-05	9.81133e-06	0	1.03531e-05	5.76214e-05	2.19896e-05	1.3028e-05	5.40999e-05	1.29037e-05	0	6.1587e-05	1.57709e-05	0
Desulfomonile	0	1.71928e-05	0	1.10762e-05	3.49142e-05	1.69961e-05	6.276e-05	1.04404e-05	0	9.34606e-06	0	1.92621e-05	0	6.35789e-05	1.00689e-05	1.52538e-05	0	2.09894e-05	3.78835e-05	0	2.49433e-05	0	9.37761e-06	9.81133e-06	0	3.10594e-05	1.92071e-05	1.09948e-05	0	0	0	0	2.46348e-05	1.57709e-05	0
Methylobacterium	0	0	0	0	4.65522e-05	1.69961e-05	8.96572e-06	0	1.30972e-05	0	9.51638e-06	9.63104e-06	0	0	2.01377e-05	0	0	0	0	0	1.24716e-05	0	1.87552e-05	9.81133e-06	8.30312e-05	1.03531e-05	0	0	3.90839e-05	0	1.29037e-05	8.45942e-05	3.69522e-05	0	4.06499e-05
Methylococcus	0	0	0	0	0	0	0	0	0	0	0	1.92621e-05	0	4.23859e-05	0	0	0	0	2.84126e-05	6.9371e-05	0.00014966	0	0	0	0	0	1.92071e-05	6.59689e-05	0	0	1.29037e-05	0	0	0	5.41998e-05
Rhizobium	0	1.71928e-05	2.2243e-05	0	1.16381e-05	5.09883e-05	8.96572e-06	4.17615e-05	0	0	0	2.88931e-05	0	2.1193e-05	2.01377e-05	1.52538e-05	1.06459e-05	1.04947e-05	1.89417e-05	0	1.24716e-05	0	0	1.96227e-05	2.76771e-05	1.03531e-05	0	0	1.3028e-05	0	0	3.62547e-05	1.23174e-05	0	1.355e-05
Azoarcus	0	0	0	0	0	0	8.96572e-06	0	0	0	0	0	0	0	0	7.62689e-06	1.06459e-05	1.04947e-05	1.89417e-05	8.67137e-06	1.24716e-05	0	0	0	0	2.07063e-05	2.88107e-05	8.79585e-05	0	0	0	0	3.69522e-05	7.88544e-05	1.355e-05
Methylovulum	0	0	0	0	0	0	0	0	0	0	0	0	0	0	0	0	0	0	1.89417e-05	8.67137e-05	0.000236961	0	0	0	0	0	0	0	0	0	0	0	0	0	0
Methanoregula	0	0	0	0	0	0	0	0	0	0	0	1.92621e-05	8.72174e-05	5.29824e-05	0	0	0	0	9.47086e-06	0	1.24716e-05	0	0	0	0	1.03531e-05	4.80178e-05	4.39792e-05	0	0	0	2.41698e-05	0	1.57709e-05	0
Rhodomicrobium	0	1.71928e-05	1.11215e-05	1.10762e-05	1.16381e-05	3.39922e-05	2.68971e-05	2.08808e-05	0	0	0	9.63104e-06	0	2.1193e-05	1.00689e-05	7.62689e-06	0	0	9.47086e-06	8.67137e-06	1.24716e-05	0	1.87552e-05	9.81133e-06	0	0	0	0	1.3028e-05	1.80333e-05	0	0	0	1.57709e-05	0
Beijerinckia	1.96912e-05	1.71928e-05	2.2243e-05	0	0	0	8.96572e-06	3.13211e-05	1.30972e-05	9.34606e-06	9.51638e-06	9.63104e-06	3.4887e-05	0	0	0	0	0	0	0	2.49433e-05	0	0	1.96227e-05	0	2.07063e-05	1.92071e-05	1.09948e-05	0	0	0	0	0	0	1.355e-05
Desulfobacca	0	0	0	1.10762e-05	1.16381e-05	0	8.96572e-06	0	0	0	1.90328e-05	1.92621e-05	3.4887e-05	3.17894e-05	0	7.62689e-06	1.06459e-05	1.04947e-05	2.84126e-05	0	0	0	0	0	0	0	1.92071e-05	0	0	1.80333e-05	0	1.20849e-05	0	3.15418e-05	0
Burkholderia	0	0	0	0	4.65522e-05	0	8.96572e-06	2.08808e-05	2.61945e-05	0	0	9.63104e-06	0	0	1.00689e-05	0	0	1.04947e-05	0	0	0	0	9.37761e-06	9.81133e-06	0	0	0	0	1.3028e-05	1.80333e-05	0	1.20849e-05	0	0	0
Fibrobacter	0	0	0	0	0	0	0	0	0	0	0	9.63104e-06	5.23304e-05	1.05965e-05	0	0	1.06459e-05	0	1.89417e-05	8.67137e-06	0	0	0	0	0	1.03531e-05	1.92071e-05	0	0	0	0	0	2.46348e-05	0	0
Immundisolibacter	0	0	2.2243e-05	0	5.81903e-05	0	1.79314e-05	0	0	9.34606e-06	0	9.63104e-06	1.74435e-05	0	0	0	0	0	0	0	0	0	0	0	0	0	0	0	2.60559e-05	0	0	0	0	0	0
Methanocella	0	0	0	0	0	0	0	0	0	0	0	1.92621e-05	3.4887e-05	2.1193e-05	0	0	0	0	0	1.73427e-05	0	0	0	0	0	0	0	1.09948e-05	0	0	0	1.20849e-05	0	0	1.355e-05
Roseiflexus	9.84562e-06	0	0	0	0	0	0	1.04404e-05	2.61945e-05	0	0	0	0	1.05965e-05	0	0	0	0	0	0	0	0	0	0	0	1.03531e-05	0	0	0	0	0	0	0	1.57709e-05	1.355e-05
Chlorobium	0	0	0	0	0	0	0	0	0	0	0	0	6.97739e-05	1.05965e-05	0	0	0	0	0	0	0	0	0	0	0	0	0	0	0	0	0	0	0	0	1.355e-05
Methanobacterium	0	0	0	0	0	0	0	0	0	0	0	0	1.74435e-05	1.05965e-05	0	0	0	0	0	0	0	0	0	0	0	1.03531e-05	1.92071e-05	1.09948e-05	0	0	1.29037e-05	0	1.23174e-05	0	0
Chlorobaculum	0	0	0	0	0	0	0	0	0	0	0	0	3.4887e-05	0	0	0	0	0	0	0	2.49433e-05	0	0	0	0	3.10594e-05	0	0	0	0	0	0	0	0	0
Desulfosporosinus	0	0	0	0	0	0	0	0	0	2.80382e-05	0	0	0	0	0	0	0	0	0	0	0	1.43668e-05	0	9.81133e-06	0	1.03531e-05	0	0	0	0	0	0	0	0	0
Vitreoscilla	0	0	0	0	1.16381e-05	0	0	0	0	0	0	0	0	0	0	0	0	0	0	0	0	0	0	0	0	2.07063e-05	0	0	0	0	0	0	0	1.57709e-05	0
Methylomicrobium	0	0	0	0	0	0	0	0	0	0	0	0	0	0	0	0	0	0	0	8.67137e-06	0	0	0	0	0	0	9.60356e-06	0	0	0	0	0	1.23174e-05	0	1.355e-05
Rhodopseudomonas	0	0	0	1.10762e-05	0	0	0	0	0	0	0	0	0	1.05965e-05	0	7.62689e-06	0	0	0	0	0	0	0	0	0	0	0	0	0	0	0	0	1.23174e-05	0	0
Sulfurospirillum	0	0	0	0	0	0	0	0	0	0	0	1.92621e-05	0	0	0	0	0	0	0	0	0	0	0	0	0	0	0	0	0	1.80333e-05	0	0	0	0	0
Leptospirillum	0	0	0	0	0	0	0	0	0	0	1.90328e-05	0	0	0	0	0	0	0	0	0	0	0	0	0	0	0	0	0	0	0	0	0	0	0	0
Aquaspirillum	0	0	0	0	0	0	0	0	0	0	0	0	1.74435e-05	0	0	0	0	0	0	0	0	0	0	0	0	0	0	0	0	0	0	0	0	0	0
Cellulosilyticum	0	0	0	0	0	0	0	0	0	0	0	0	0	0	0	7.62689e-06	0	0	0	0	0	0	9.37761e-06	0	0	0	0	0	0	0	0	0	0	0	0
Methylocella	0	0	0	0	0	0	0	0	0	0	0	0	0	0	0	0	0	0	0	0	0	0	0	0	0	0	0	0	1.3028e-05	0	0	0	0	0	0
Rubrivivax	0	0	0	0	0	0	0	0	0	0	0	0	0	0	0	0	0	0	0	0	0	0	0	0	0	0	0	0	0	0	1.29037e-05	0	0	0	0
Sulfurimonas	0	0	0	0	0	0	0	0	0	0	0	0	0	0	0	0	0	0	0	0	0	0	0	0	0	1.03531e-05	0	0	0	0	0	0	0	0	0
Caldicellulosiruptor	0	0	0	0	0	0	0	0	0	0	0	0	0	0	0	0	0	0	9.47086e-06	0	0	0	0	0	0	0	0	0	0	0	0	0	0	0	0
Acidithiobacillus	0	0	0	0	0	0	0	0	0	9.34606e-06	0	0	0	0	0	0	0	0	0	0	0	0	0	0	0	0	0	0	0	0	0	0	0	0	0
Anaerocolumna	0	0	0	0	0	0	0	0	0	0	0	0	0	0	0	0	0	0	0	8.67137e-06	0	0	0	0	0	0	0	0	0	0	0	0	0	0	0
Sporomusa	0	0	0	0	0	0	0	0	0	0	0	0	0	0	0	0	0	0	0	8.67137e-06	0	0	0	0	0	0	0	0	0	0	0	0	0	0	0
Methylocaldum	0	0	0	0	0	0	0	0	0	0	0	0	0	0	0	7.62689e-06	0	0	0	0	0	0	0	0	0	0	0	0	0	0	0	0	0	0	0

## Sheet: M00176
	C0	C2	C5	C8	C11	C14	C17	MP0	MP2	MP5	MP8	MP11	MP14	MP17	EP0	EP2	EP5	EP8	EP11	EP14	EP17	PP0	PP2	PP5	PP8	PP11	PP14	PP17	BP0	BP2	BP5	BP8	BP11	BP14	BP17
Nitrospira	0.00685255	0.0189464	0.0118444	0.010622	0.02984	0.00164862	0.0318104	0.0184273	0.0140664	0.00575717	0.00914524	0.0115958	0.0116522	0.0165729	0.010814	0.0188384	0.00382187	0.0045652	0.0111756	0.00814242	0.00492629	0.00828963	0.0205557	0.0110377	0.00181285	0.00953525	0.0119756	0.00222095	0.00970583	0.0127676	0.00160006	0.0107193	0.0115784	0.00517285	0.00586713
Geobacter	0.000383979	0.00338697	0.00387028	0.00295734	0.0041897	0.000152965	0.00278834	0.00365413	0.00436138	0.00440199	0.00722293	0.01018	0.0130826	0.0147291	0.00505457	0.00906075	0.00385381	0.00389354	0.0108252	0.0101108	0.00990247	0.00139358	0.00500764	0.00614189	0.00285074	0.00863452	0.0139732	0.00818014	0.00287918	0.00440012	0.00259365	0.00924494	0.00500086	0.00559866	0.00844162
Flavobacterium	0.00275677	0.000911217	0.00167935	0.000985778	0.00129182	0.00397709	0.00114761	0.00236996	0.00400775	0.00524314	0.0358577	0.00226329	0.0012036	0.000445052	0.00586008	0.00411852	0.00687724	0.0112608	0.00643072	0.0020898	0.000848071	0.00870627	0.00185677	0.00148151	0.00107941	0.00039342	0.00261217	0.000857595	0.00319185	0.00304763	0.00227106	0.00983226	0.00136723	0.000141938	0.000948497
Pseudomonas	0.00939371	0.00753043	0.00344766	0.00459882	0.000174571	0.00606081	0.000618634	0.00215072	0.000929904	0.0121686	0.0038351	0.0015506	0.000156991	3.18e-05	0.0105622	0.000854212	0.0103797	0.00132234	0.00261396	0.00118798	8.73e-05	0.00546656	0.00301959	0.00151095	0.00454873	0.000207063	0.00083551	0.00358431	0.00222908	0.00187546	0.00608411	0.0145744	0.000197078	0.000346959	0.00588068
Anaeromyxobacter	0.00031506	0.000429819	0.00141243	0.000465199	0.00272331	1.69961e-05	0.0012821	0.000699505	0.00116565	0.000598148	0.00181763	0.00509482	0.00495395	0.00522406	0.00035241	0.00160927	0.00105394	0.00130134	0.00678114	0.0068157	0.00409069	0.000373536	0.00131287	0.00109887	0.000484349	0.0135937	0.00486901	0.00260577	0.00050809	0.000955764	0.000400015	0.000954706	0.00953366	0.0024918	0.00333329
Rheinheimera	9.84562e-05	0.000137542	0.000189065	0.000265828	0.000151295	0	0.0218763	1.04404e-05	0.000419111	0.000551417	0.00369236	0.00125204	0.000837287	3.17894e-05	2.01377e-05	0.000129657	0.0189071	0.00154272	0.000483014	0.00137875	0.0089671	0.000215502	0.000515768	0.000215849	0.00127315	0.000124238	0.000393746	0.00288064	2.60559e-05	9.01664e-05	0.00566473	0.000108764	0.000468061	0.00036273	0.00104335
Janthinobacterium	0.000541509	0.000326663	0.000266916	0.001163	0	0.0138518	0	0.000104404	1.30972e-05	0.00826191	0.00186521	9.63104e-06	0	0	0.000513512	7.62689e-06	0.00540811	0	9.47086e-06	8.67137e-06	0	0.00110624	0	0	0.000110708	0	0	0	7.81677e-05	1.80333e-05	0.0161813	0.00560739	0	0	0.00203249
Hyphomicrobium	0.000433207	0.000945602	0.000367009	0.000465199	0.00112889	0.00188657	0.00242074	0.00084567	0.00201697	0.000803761	0.0017986	0.00162765	0.00226765	0.00226765	0.000563857	0.00136521	0.00077715	0.00103898	0.00236772	0.00270547	0.00265646	0.000632138	0.00136913	0.00130491	0.00047051	0.00264005	0.00195913	0.00183613	0.00070351	0.000973798	0.000645186	0.000592159	0.00282068	0.00506245	0.00367204
Sphingomonas	0.0005612	0.00061894	0.000556075	0.000642417	0.00126855	0.00103676	0.000645531	0.000908313	0.00147999	0.000551417	0.000875507	0.00101126	0.000976835	0.00105965	0.000966612	0.00174656	0.000745212	0.000766115	0.00098497	0.00069371	0.000498865	0.000833273	0.000515768	0.00113811	0.000595057	0.000652248	0.000633835	0.000406808	0.000924985	0.000234433	0.000387112	0.00105138	0.00112088	0.000630835	0.000880747
Azotobacter	0	0.0011863	0.00252458	0.000841788	0.0021414	0.000492887	0.000797949	0	0	0.000196267	0.000437753	0.000645279	0.000436087	0.000508631	0	0	0.00150107	0.000692652	0.00209306	0.000832452	0.00124716	0	0	0.000333585	0.000581218	0.00174968	0.000480178	0.000736652	0	0	0.00086455	0.00118432	0.00139187	0.00186096	0.00172084
Bradyrhizobium	0.000255986	0.000584554	0.000322523	0.000343361	0.000814664	0.000900794	0.000986229	0.000793469	0.00104778	0.000364496	0.000837441	0.00162765	0.00158736	0.00137754	0.000573926	0.00104488	0.000745212	0.000430284	0.00124068	0.00121399	0.000972787	0.000215502	0.000890873	0.000716227	0.000221417	0.000942136	0.000960356	0.000912569	0.000390839	0.000414766	0.000322593	0.000362547	0.000739044	0.000835857	0.0010298
Brevundimonas	0	5.15783e-05	4.4486e-05	1.10762e-05	0.000232761	0.00584666	0.00165866	9.39634e-05	0.000288139	0.000420573	0.000837441	0.000356348	0.000191878	4.23859e-05	0.000191309	0.000144911	0.000564232	0.00188905	0.000369364	0.000294827	0.000648525	2.87336e-05	0.000243818	0.000559246	0.00123163	0.000973196	9.60356e-05	0.000428798	0.000117252	0.000234433	0.000606475	0.0011964	0.000837583	0.000835857	0.00186989
Novosphingobium	0.000196912	0.000223506	0.000266916	0.000155066	0.000581903	0.000407907	0.000331731	0.000459377	0.000510792	0.0052151	0.00120858	0.000548969	0.000732626	0.000243719	0.000422893	0.000381345	0.00117105	0.000965514	0.000388305	0.000234127	0.000112245	0.000560305	0.000506391	0.00044151	0.000359802	0.000538364	0.000201675	0.000219896	0.00070351	0.000270499	0.00154845	0.000616329	0.000763678	0.000220792	0.000298099
Rhodococcus	0.00323921	1.71928e-05	2.2243e-05	3.32285e-05	0	0	8.96572e-06	0.000689065	1.30972e-05	0.000299074	9.51638e-06	0.000539338	0	1.05965e-05	0.00334286	1.52538e-05	0.000234209	1.04947e-05	0	0	0	0.00721213	0.000403237	6.86793e-05	1.38385e-05	0	0	0	0.00256651	0.00225416	0.000438727	0	1.23174e-05	0	0
Chryseolinea	0.000265832	0.000326663	0.000767383	0.000232599	0.00083794	6.79844e-05	0.000331731	0.00101272	0.00107397	0.000420573	0.000494852	0.00065491	0.000313983	0.000498034	0.000745096	0.000930481	0.000894254	0.000293852	0.000492485	0.000511611	0.000261904	0.00076144	0.00176299	0.00103019	0.000179901	0.000352007	0.000374539	0.000307855	0.000911957	0.0017312	0.000258075	0.000713008	0.000591235	0.000520439	0.000176149
Massilia	8.86106e-05	0	0	2.21523e-05	0.000139657	0.0181009	0	5.22019e-05	0.000117875	1.86921e-05	4.75819e-05	9.63104e-06	0	1.05965e-05	2.01377e-05	5.33882e-05	1.06459e-05	2.09894e-05	1.89417e-05	8.67137e-06	0	7.18339e-05	1.87552e-05	9.81133e-06	1.38385e-05	1.03531e-05	3.84143e-05	1.09948e-05	0.000104224	3.60666e-05	0.000890357	0.000410886	6.1587e-05	1.57709e-05	5.41998e-05
Sphingobium	5.90737e-05	5.15783e-05	0.000100093	4.43046e-05	0.000151295	0.000475891	0.000161383	8.3523e-05	0.000183361	0.000317766	0.000228393	0.000231145	0.000122104	6.35789e-05	0.000171171	0.000282195	0.000425835	0.000650673	0.000322009	0.000173427	0.000311791	0.000129301	5.62656e-05	0.000117736	0.000442833	0.00120097	8.64321e-05	0.00057173	0.000156335	1.80333e-05	0.00394725	0.000253783	0.000763678	0.00107242	0.000636848
Shewanella	9.84562e-06	0	3.33645e-05	5.53808e-05	0.000256037	0	0.000206211	0	5.23889e-05	3.73842e-05	9.51638e-06	0.000452659	0.000174435	2.1193e-05	1.00689e-05	4.57614e-05	0	0.000104947	0.000274655	0.000121399	0.000162131	0	0	0	0.000152224	0.000134591	0	0.0101042	1.3028e-05	0	0	0.000120849	0.0008499	0	1.355e-05
Gemmata	0.000118147	0.000275084	0.000266916	0.000155066	0.000523713	0.000135969	0.000520011	0.000208808	0.000458403	0.000177575	0.000456786	0.000385241	0.0004012	0.000328491	0.000191309	0.000388972	0.000340668	0.000230884	0.000634548	0.000450911	0.000636053	0.000143668	0.000290706	0.000451321	0.000345963	0.000621189	0.000422557	0.000604715	0.000169363	0.0001623	0.000154845	0.000314207	0.000775996	0.000788544	0.000785897
Haliscomenobacter	0.000108302	6.87711e-05	1.11215e-05	3.32285e-05	2.32761e-05	0	2.68971e-05	0.000302771	0.000890612	0.000280382	0.000932605	0.000394872	0.000436087	3.17894e-05	0.000140964	0.000610151	0.000255501	0.000251873	0.000179946	0.00025147	0.000586166	0.000129301	0.000271951	0.000264906	0.000179901	0.000269182	1.92071e-05	0.000186912	0.000247531	0.000432799	0.000129037	0.000290037	0.000554283	0.00252334	0.000921397
Meiothermus	0.000187067	0.000378241	0.000189065	0.000243676	0.000488798	0.000356918	0.000591737	0.000344532	0.000550084	0.000158883	0.000218877	0.000250407	0.000418644	0.000455648	0.000161102	0.00056439	0.000127751	0.000188905	0.000492485	0.000398883	0.000411564	0.000172401	0.000159419	0.000225661	5.53541e-05	0.000331301	0.00040335	0.000307855	0.000117252	9.01664e-05	7.74224e-05	0.000302122	0.0002833	0.000141938	0.000460698
Luteolibacter	8.86106e-05	6.87711e-05	5.56075e-05	0.000132914	0.000337504	0.000152965	0.000340697	0.000344532	0.000222653	0.000168229	0.00034259	0.000587493	0.00075007	0.000381473	0.00018124	0.000266941	0.000117105	0.000136431	0.000246242	0.000242798	0.000124716	0.000186768	8.43985e-05	0.000166793	0.000110708	0.00055907	0.000364935	6.59689e-05	0.000286615	5.40999e-05	5.16149e-05	0.000906366	0.000603552	0.000157709	6.77498e-05
Comamonas	7.8765e-05	5.15783e-05	3.33645e-05	2.21523e-05	2.32761e-05	1.69961e-05	1.79314e-05	0.000135725	0.000969195	0.000224305	0.000704212	0.000452659	0.000470974	0.000116561	0.000100689	0.00428631	0.000212918	0.000241379	0.000123121	0.000182099	3.74149e-05	1.43668e-05	9.37761e-06	9.81133e-06	1.38385e-05	0	0	1.09948e-05	2.60559e-05	3.60666e-05	1.29037e-05	3.62547e-05	2.46348e-05	1.57709e-05	2.70999e-05
Aeromonas	9.84562e-06	3.43855e-05	1.11215e-05	3.32285e-05	4.65522e-05	0	0.000179314	1.04404e-05	0	4.67303e-05	0.00010468	5.77862e-05	3.4887e-05	2.1193e-05	3.02066e-05	3.81345e-05	5.32294e-05	6.29683e-05	9.47086e-06	0.000424897	9.9773e-05	2.87336e-05	9.37761e-06	1.96227e-05	0.000332125	0.000113885	2.88107e-05	0.0052995	0	0.0001082	7.74224e-05	0.000108764	0.000788313	4.73126e-05	0.0001355
Bosea	6.89193e-05	3.43855e-05	2.2243e-05	3.32285e-05	8.14664e-05	0.000220949	1.79314e-05	0.000177486	0.000117875	0.000523379	0.000237909	0.000173359	0.000139548	3.17894e-05	0.000231584	0.000152538	0.000351314	0.000230884	8.52378e-05	8.67137e-05	4.98865e-05	0.000646505	0.000140664	0.000343396	0.000982536	0.000207063	0.000153657	8.79585e-05	0.000377811	0.000270499	0.000283882	0.000145019	0.000344887	0.00053621	0.000176149
Acinetobacter	0.000905797	0.000343855	1.11215e-05	0.00221523	6.98283e-05	0.000560872	2.68971e-05	0	3.92917e-05	3.73842e-05	3.80655e-05	0.000231145	1.74435e-05	1.05965e-05	8.0551e-05	7.62689e-06	0.000191626	1.04947e-05	0	8.67137e-06	1.24716e-05	0.00117808	9.37761e-06	9.81133e-06	0.000622734	2.07063e-05	9.60356e-06	0	0.000260559	0	0	6.04244e-05	3.69522e-05	0	2.70999e-05
Nocardioides	0.000118147	0.000103157	0.000122336	6.6457e-05	0.000314228	0.000322926	0.000107589	0.000114844	0.000170264	8.41145e-05	9.51638e-05	0.000221514	0.000156991	0.000243719	7.04821e-05	0.00022118	0.000149042	7.3463e-05	0.000416718	0.000208113	0.000137188	0.000143668	0.000328216	0.000117736	9.68697e-05	0.000569423	0.000211278	0.000120943	7.81677e-05	0.000270499	0.000116134	8.45942e-05	0.000628187	0.000141938	0.000216799
Pirellula	9.84562e-05	0.00018912	8.89719e-05	8.86093e-05	0.000349142	0.000169961	0.000546909	0.000198367	0.000196459	7.47685e-05	0.000142746	0.000192621	0.000261652	0.000233122	0.000171171	0.000251687	0.000149042	0.000115442	0.000246242	0.000182099	0.000174603	7.18339e-05	0.000112531	0.000225661	4.15156e-05	0.000217416	0.000211278	0.000153927	0.000143308	0.000126233	5.16149e-05	0.000120849	0.000246348	0.000252334	0.000447148
Sulfuricurvum	0	0	2.2243e-05	0.000166142	0	0	3.58629e-05	0	0	0	0.000361622	7.70483e-05	0.000191878	1.05965e-05	4.02755e-05	1.52538e-05	1.06459e-05	0.000220389	2.84126e-05	6.06996e-05	6.23581e-05	0	0	0.000402264	0	1.03531e-05	1.92071e-05	2.19896e-05	0	0	0	0.0046406	0	6.30835e-05	1.355e-05
Acidovorax	0.000334751	1.71928e-05	5.56075e-05	3.32285e-05	0	0	8.96572e-06	2.08808e-05	0.000196459	0.000121499	9.51638e-05	3.85241e-05	5.23304e-05	1.05965e-05	0.000845785	0.000396598	0.000883609	5.24736e-05	1.89417e-05	0.000112728	6.23581e-05	0.00107751	9.37761e-05	9.81133e-06	5.53541e-05	2.07063e-05	0	0.000120943	0.000547174	0.000126233	0.000180652	7.25093e-05	9.85392e-05	1.57709e-05	2.70999e-05
Cupriavidus	5.90737e-05	6.87711e-05	0.000122336	4.43046e-05	0.000267675	0.000118973	0.000107589	0.000198367	0.000222653	6.54224e-05	7.6131e-05	0.00018299	0.000156991	0.000190737	0.000100689	0.000648286	0.000223564	0.000157421	0.000255713	0.000277484	0.000112245	7.18339e-05	9.37761e-05	0.000137359	8.30312e-05	0.000269182	0.000172864	0.000109948	6.51398e-05	0.000126233	5.16149e-05	0.000145019	0.000295617	0.000110396	8.12997e-05
Lysobacter	9.84562e-05	0.000154735	7.78504e-05	0.000110762	0.000174571	0.000237946	0.000170349	0.000261009	0.00037982	2.80382e-05	0.000133229	0.000115572	0.000191878	0.000413263	0.000171171	0.000312703	9.5813e-05	8.39578e-05	0.000170476	7.80424e-05	4.98865e-05	0.000244235	0.000121909	0.000274717	4.15156e-05	0.000124238	0.000201675	4.39792e-05	0.000182391	7.21332e-05	5.16149e-05	0.000193358	0.000184761	3.15418e-05	9.48497e-05
Caulobacter	0.000108302	5.15783e-05	2.2243e-05	2.21523e-05	0.000116381	0.000577868	0.000134486	9.39634e-05	0.000340528	0.000130845	0.000275975	0.000250407	5.23304e-05	0	0.00027186	4.57614e-05	0.000127751	0	2.84126e-05	8.67137e-06	1.24716e-05	0.000488471	0.000159419	0.000274717	0.000124547	2.07063e-05	1.92071e-05	1.09948e-05	0.000299643	9.01664e-05	6.45186e-05	6.04244e-05	2.46348e-05	0.000520439	0
Melioribacter	0	8.59638e-05	5.56075e-05	0.000132914	0.000162933	3.39922e-05	7.17257e-05	0	1.30972e-05	4.67303e-05	0.000161778	0.000433397	0.000226765	0.000498034	0	7.62689e-06	7.45212e-05	9.44525e-05	0.000227301	0.000130071	6.23581e-05	1.43668e-05	9.37761e-06	0.000166793	0.000207578	0.00019671	0.000345728	6.59689e-05	2.60559e-05	0	3.87112e-05	0.000640499	0.000431109	0.000110396	4.06499e-05
Lacipirellula	5.90737e-05	0	5.56075e-05	4.43046e-05	0.000116381	8.49805e-05	0.000242074	0.000187927	0.000183361	7.47685e-05	0.000123713	0.000163728	0.000209322	0.000243719	4.02755e-05	0.000167792	8.51671e-05	4.19789e-05	0.000142063	0.000156085	0.000236961	2.87336e-05	6.56433e-05	0.000137359	4.15156e-05	0.000144944	0.000144053	4.39792e-05	0.000156335	9.01664e-05	7.74224e-05	6.04244e-05	0.000184761	0.00036273	0.000216799
Desulfuromonas	0	0	3.33645e-05	4.43046e-05	8.14664e-05	0	1.79314e-05	3.13211e-05	2.61945e-05	5.60763e-05	7.6131e-05	0.000202252	0.000261652	0.000275508	4.02755e-05	7.62689e-05	8.51671e-05	4.19789e-05	0.000198888	0.00025147	0.000112245	1.43668e-05	4.6888e-05	5.8868e-05	4.15156e-05	0.000279535	0.000307314	0.000230891	0	1.80333e-05	0	0.000145019	0.000135491	9.46253e-05	0.000311649
Xanthobacter	0	0	0	0	0	0	0	0	1.30972e-05	8.41145e-05	0.000152262	0.000327455	0.0004012	9.53683e-05	0	0	3.19377e-05	4.19789e-05	2.84126e-05	0.00019077	3.74149e-05	1.43668e-05	0	7.84906e-05	0.000304448	0.000424479	0.000364935	0.000175917	0	0	0.00010323	3.62547e-05	0.000443426	0.000126167	5.41998e-05
Panacibacter	2.95369e-05	8.59638e-05	5.56075e-05	4.43046e-05	0.000174571	1.69961e-05	4.48286e-05	0.000146165	0.000130972	1.86921e-05	0.000123713	0.000115572	8.72174e-05	0.000105965	0.000110758	0.000259314	7.45212e-05	6.29683e-05	0.000132592	0.000130071	4.98865e-05	0.000129301	0.000159419	0.000166793	1.38385e-05	0.000113885	1.92071e-05	5.49741e-05	0.000104224	0.000126233	2.58075e-05	0.000145019	6.1587e-05	0.000126167	0.000189699
Ancylobacter	0	0	0	0	2.32761e-05	1.69961e-05	1.79314e-05	0	1.30972e-05	2.80382e-05	9.51638e-06	0.000337086	5.23304e-05	0	1.00689e-05	7.62689e-06	0	0	2.84126e-05	5.20282e-05	7.48298e-05	0	0	0	5.53541e-05	0.00128379	0.000124846	4.39792e-05	2.60559e-05	0	1.29037e-05	7.25093e-05	0.000874535	9.46253e-05	8.12997e-05
Rhizobacter	6.89193e-05	5.15783e-05	8.89719e-05	2.21523e-05	0.000116381	0	9.86229e-05	0.000135725	0.000222653	3.73842e-05	2.85491e-05	6.74172e-05	5.23304e-05	4.23859e-05	0.000191309	0.000129657	7.45212e-05	0.000104947	4.73543e-05	9.53851e-05	6.23581e-05	0.000215502	7.50209e-05	6.86793e-05	5.53541e-05	8.28252e-05	6.7225e-05	3.29844e-05	0.000260559	0.000234433	1.29037e-05	7.25093e-05	4.92696e-05	0.000315418	5.41998e-05
Methylomonas	0	1.71928e-05	0	1.10762e-05	0	0	2.68971e-05	1.04404e-05	1.30972e-05	9.34606e-06	2.85491e-05	1.92621e-05	6.97739e-05	5.29824e-05	3.02066e-05	1.52538e-05	1.06459e-05	2.09894e-05	0.000255713	0.000702381	0.000773241	1.43668e-05	9.37761e-06	0	1.38385e-05	0.000124238	0.000153657	3.29844e-05	2.60559e-05	1.80333e-05	1.29037e-05	0	4.92696e-05	0.000488897	0.000230349
Mycobacterium	7.8765e-05	5.15783e-05	3.33645e-05	6.6457e-05	0.000139657	0.000118973	5.37943e-05	6.26423e-05	0.000130972	9.34606e-06	7.6131e-05	0.000115572	0.000156991	3.17894e-05	1.00689e-05	9.15227e-05	7.45212e-05	3.14842e-05	5.68252e-05	6.9371e-05	7.48298e-05	7.18339e-05	0.000281328	0.000107925	6.91927e-05	8.28252e-05	0.000144053	8.79585e-05	6.51398e-05	0.000324599	2.58075e-05	7.25093e-05	0.000209396	9.46253e-05	4.06499e-05
Mesorhizobium	4.92281e-05	3.43855e-05	6.67289e-05	8.86093e-05	0.000104743	0.000220949	6.276e-05	0.000114844	0.000183361	4.67303e-05	5.70983e-05	0.000202252	0.000122104	0.000148351	0.000110758	0.000198299	8.51671e-05	0.000115442	0.000123121	7.80424e-05	7.48298e-05	0.000129301	0.000140664	6.86793e-05	0	0.000144944	2.88107e-05	4.39792e-05	3.90839e-05	5.40999e-05	2.58075e-05	3.62547e-05	7.39044e-05	7.88544e-05	4.06499e-05
Flavihumibacter	2.95369e-05	8.59638e-05	4.4486e-05	6.6457e-05	0.000162933	0.000492887	0.00018828	7.30826e-05	0.000183361	6.54224e-05	9.51638e-05	6.74172e-05	5.23304e-05	2.1193e-05	7.04821e-05	0.000144911	1.06459e-05	1.04947e-05	3.78835e-05	4.33569e-05	2.49433e-05	1.43668e-05	0.000150042	7.84906e-05	0	1.03531e-05	2.88107e-05	2.19896e-05	5.21118e-05	9.01664e-05	2.58075e-05	6.04244e-05	4.92696e-05	4.73126e-05	4.06499e-05
Labrys	9.84562e-06	8.59638e-05	5.56075e-05	3.32285e-05	3.49142e-05	6.79844e-05	6.276e-05	0.000135725	9.16806e-05	9.34606e-06	3.80655e-05	0.000144466	0.000104661	0.000169544	8.0551e-05	0.000198299	3.19377e-05	3.14842e-05	5.68252e-05	4.33569e-05	6.23581e-05	5.74671e-05	7.50209e-05	0.000117736	2.76771e-05	6.21189e-05	5.76214e-05	6.59689e-05	5.21118e-05	5.40999e-05	2.58075e-05	4.83395e-05	6.1587e-05	7.88544e-05	0.0001084
Methylocystis	0	3.43855e-05	3.33645e-05	1.10762e-05	3.49142e-05	0	0	0	1.30972e-05	0	0	6.74172e-05	6.97739e-05	4.23859e-05	0	3.81345e-05	2.12918e-05	4.19789e-05	0.000161005	0.000225456	0.000586166	0	2.81328e-05	0	0	8.28252e-05	0.000230486	0.000142933	0	0	1.29037e-05	1.20849e-05	4.92696e-05	0.000189251	0.000162599
Nitrosopumilus	4.92281e-05	0.000103157	7.78504e-05	2.21523e-05	0.000395694	0	0.000143451	8.3523e-05	2.61945e-05	9.34606e-06	4.75819e-05	6.74172e-05	1.74435e-05	7.41753e-05	3.02066e-05	6.8642e-05	0	0	0.000123121	4.33569e-05	1.24716e-05	1.43668e-05	9.37761e-05	5.8868e-05	2.76771e-05	9.31783e-05	7.68285e-05	3.29844e-05	9.11957e-05	9.01664e-05	2.58075e-05	3.62547e-05	0.000110857	1.57709e-05	4.06499e-05
Limnoglobus	4.92281e-05	5.15783e-05	5.56075e-05	1.10762e-05	9.31045e-05	3.39922e-05	0.000197246	3.13211e-05	6.54862e-05	1.86921e-05	5.70983e-05	6.74172e-05	0	8.47718e-05	0.000100689	0.000114403	4.25835e-05	0	0.000132592	7.80424e-05	4.98865e-05	5.74671e-05	6.56433e-05	6.86793e-05	2.76771e-05	9.31783e-05	0.000105639	1.09948e-05	2.60559e-05	0	0	6.04244e-05	7.39044e-05	6.30835e-05	9.48497e-05
Variovorax	4.92281e-05	5.15783e-05	5.56075e-05	3.32285e-05	6.98283e-05	8.49805e-05	3.58629e-05	0.000114844	1.30972e-05	4.67303e-05	4.75819e-05	4.81552e-05	1.74435e-05	1.05965e-05	0.000100689	0.00012203	0.000159688	3.14842e-05	9.47086e-05	4.33569e-05	4.98865e-05	0.000158035	4.6888e-05	0.000166793	2.76771e-05	2.07063e-05	9.60356e-06	0	0.00013028	5.40999e-05	2.58075e-05	0	3.69522e-05	3.15418e-05	1.355e-05
Steroidobacter	9.84562e-06	1.71928e-05	0.000155701	0	6.98283e-05	3.39922e-05	1.79314e-05	3.13211e-05	1.30972e-05	1.86921e-05	5.70983e-05	0.000173359	8.72174e-05	5.29824e-05	2.01377e-05	5.33882e-05	2.12918e-05	3.14842e-05	3.78835e-05	4.33569e-05	1.24716e-05	1.43668e-05	9.37761e-05	7.84906e-05	0	4.14126e-05	9.60356e-05	1.09948e-05	5.21118e-05	7.21332e-05	2.58075e-05	8.45942e-05	0.000197078	6.30835e-05	5.41998e-05
Opitutus	0	1.71928e-05	2.2243e-05	3.32285e-05	6.98283e-05	0	0.000215177	3.13211e-05	5.23889e-05	2.80382e-05	5.70983e-05	8.66793e-05	6.97739e-05	4.23859e-05	1.00689e-05	5.33882e-05	3.19377e-05	0	2.84126e-05	9.53851e-05	4.98865e-05	0	4.6888e-05	2.9434e-05	4.15156e-05	4.14126e-05	5.76214e-05	6.59689e-05	1.3028e-05	1.80333e-05	2.58075e-05	0.000120849	6.1587e-05	6.30835e-05	5.41998e-05
Cellvibrio	2.95369e-05	3.43855e-05	5.56075e-05	2.21523e-05	3.49142e-05	0	0.000555874	6.26423e-05	0.000275042	9.34606e-06	0	9.63104e-06	1.74435e-05	0	6.04132e-05	3.05076e-05	0	0	2.84126e-05	0	0	5.74671e-05	8.43985e-05	9.81133e-06	0	0	9.60356e-06	2.19896e-05	7.81677e-05	1.80333e-05	0	1.20849e-05	1.23174e-05	0	2.70999e-05
Pseudoxanthomonas	9.84562e-06	6.87711e-05	7.78504e-05	4.43046e-05	8.14664e-05	1.69961e-05	1.79314e-05	5.22019e-05	5.23889e-05	3.73842e-05	2.85491e-05	1.92621e-05	0	3.17894e-05	5.03444e-05	9.15227e-05	4.25835e-05	2.09894e-05	1.89417e-05	1.73427e-05	1.24716e-05	5.74671e-05	2.81328e-05	2.9434e-05	1.38385e-05	3.10594e-05	9.60356e-06	1.09948e-05	6.51398e-05	1.80333e-05	1.29037e-05	7.25093e-05	6.1587e-05	0.000205021	1.355e-05
Gimesia	1.96912e-05	6.87711e-05	0	1.10762e-05	6.98283e-05	8.49805e-05	7.17257e-05	9.39634e-05	2.61945e-05	2.80382e-05	1.90328e-05	1.92621e-05	8.72174e-05	4.23859e-05	2.01377e-05	6.10151e-05	9.5813e-05	0	1.89417e-05	6.06996e-05	0	2.87336e-05	6.56433e-05	2.9434e-05	1.38385e-05	6.21189e-05	4.80178e-05	3.29844e-05	2.60559e-05	5.40999e-05	0	2.41698e-05	1.23174e-05	4.73126e-05	5.41998e-05
Sulfuriferula	9.84562e-06	0	0	0	0	0	0	0	0	0	0	0	0	0	0	0	4.25835e-05	0	0	0	0	0	0	1.96227e-05	0	0	0	0	0	0	0	0.00123266	0	0	0
Emticicia	9.84562e-06	1.71928e-05	0	0	0	0	0	1.04404e-05	0.000104778	9.34606e-06	3.80655e-05	4.81552e-05	0	0	0.000120826	7.62689e-06	1.06459e-05	0.000125937	2.84126e-05	1.73427e-05	1.24716e-05	0.000215502	9.37761e-06	0	1.38385e-05	5.17657e-05	0	1.09948e-05	0.000234503	9.01664e-05	0	3.62547e-05	0	0	0
Permianibacter	3.93825e-05	3.43855e-05	4.4486e-05	6.6457e-05	9.31045e-05	0	1.79314e-05	6.26423e-05	7.85834e-05	1.86921e-05	2.85491e-05	1.92621e-05	1.74435e-05	1.05965e-05	2.01377e-05	5.33882e-05	0	4.19789e-05	9.47086e-06	8.67137e-06	1.24716e-05	1.43668e-05	0.000215685	2.9434e-05	1.38385e-05	1.03531e-05	0	0	7.81677e-05	5.40999e-05	1.29037e-05	6.04244e-05	2.46348e-05	0	0
Spirochaeta	0	0	0.000100093	1.10762e-05	4.65522e-05	0	1.79314e-05	3.13211e-05	0.00014407	0	1.90328e-05	8.66793e-05	3.4887e-05	1.05965e-05	1.00689e-05	9.15227e-05	2.12918e-05	0	3.78835e-05	8.67137e-06	0	1.43668e-05	4.6888e-05	3.92453e-05	1.38385e-05	1.03531e-05	0	0	1.3028e-05	9.01664e-05	2.58075e-05	7.25093e-05	0.000123174	3.15418e-05	0
Mariniblastus	0	1.71928e-05	2.2243e-05	1.10762e-05	0.000104743	5.09883e-05	5.37943e-05	1.04404e-05	5.23889e-05	2.80382e-05	9.51638e-06	1.92621e-05	1.74435e-05	2.1193e-05	1.00689e-05	5.33882e-05	3.19377e-05	1.04947e-05	1.89417e-05	4.33569e-05	2.49433e-05	2.87336e-05	1.87552e-05	1.96227e-05	1.38385e-05	4.14126e-05	9.60356e-06	5.49741e-05	7.81677e-05	0	0	1.20849e-05	0	6.30835e-05	2.70999e-05
Tolumonas	0	0	1.11215e-05	0	0	0	8.96572e-06	4.17615e-05	1.30972e-05	0.00066357	9.51638e-06	9.63104e-06	0	1.05965e-05	2.01377e-05	2.28807e-05	1.06459e-05	0	0	0	0	0	0	0	1.38385e-05	0	9.60356e-06	0	2.60559e-05	0	7.74224e-05	1.20849e-05	0	0	0
Staphylococcus	0	0	1.11215e-05	0	0.000151295	0	2.68971e-05	0	0	0	0	9.63104e-06	0	2.1193e-05	1.00689e-05	7.62689e-06	0	0	9.47086e-06	0	0	0.000244235	0.000121909	0	2.76771e-05	6.21189e-05	9.60356e-06	0	1.3028e-05	3.60666e-05	0	6.04244e-05	7.39044e-05	0	1.355e-05
Ilumatobacter	9.84562e-06	1.71928e-05	1.11215e-05	1.10762e-05	1.16381e-05	6.79844e-05	8.96572e-06	4.17615e-05	2.61945e-05	9.34606e-06	9.51638e-06	6.74172e-05	0	3.17894e-05	3.02066e-05	1.52538e-05	0	1.04947e-05	6.6296e-05	1.73427e-05	0	2.87336e-05	3.75104e-05	1.96227e-05	1.38385e-05	2.07063e-05	5.76214e-05	1.09948e-05	2.60559e-05	1.80333e-05	1.29037e-05	0	3.69522e-05	6.30835e-05	4.06499e-05
Paraburkholderia	0	0	1.11215e-05	0	5.81903e-05	5.09883e-05	8.96572e-06	5.22019e-05	5.23889e-05	9.34606e-06	1.90328e-05	1.92621e-05	5.23304e-05	3.17894e-05	6.04132e-05	6.8642e-05	4.25835e-05	2.09894e-05	9.47086e-06	1.73427e-05	1.24716e-05	2.87336e-05	0	9.81133e-06	0	3.10594e-05	0	0	2.60559e-05	0	1.29037e-05	1.20849e-05	9.85392e-05	1.57709e-05	0
Kribbella	1.96912e-05	1.71928e-05	2.2243e-05	2.21523e-05	3.49142e-05	1.69961e-05	1.79314e-05	4.17615e-05	2.61945e-05	0	0	9.63104e-06	0	2.1193e-05	1.00689e-05	3.81345e-05	5.32294e-05	1.04947e-05	5.68252e-05	0	2.49433e-05	1.43668e-05	8.43985e-05	2.9434e-05	0	1.03531e-05	6.7225e-05	0	1.3028e-05	3.60666e-05	1.29037e-05	1.20849e-05	6.1587e-05	1.57709e-05	2.70999e-05
Sphingopyxis	1.96912e-05	0	0	1.10762e-05	3.49142e-05	3.39922e-05	8.96572e-06	5.22019e-05	6.54862e-05	2.80382e-05	1.90328e-05	0	0	0	2.01377e-05	6.8642e-05	4.25835e-05	2.09894e-05	4.73543e-05	0	2.49433e-05	5.74671e-05	9.37761e-06	1.96227e-05	1.38385e-05	0	9.60356e-06	0	5.21118e-05	3.60666e-05	1.29037e-05	6.04244e-05	3.69522e-05	1.57709e-05	0
Nitrosomonas	0	3.43855e-05	1.11215e-05	0	4.65522e-05	0	0	1.04404e-05	6.54862e-05	2.80382e-05	9.51638e-06	1.92621e-05	3.4887e-05	5.29824e-05	3.02066e-05	0.00012203	0	0	9.47086e-06	2.60141e-05	2.49433e-05	2.87336e-05	6.56433e-05	1.96227e-05	0	1.03531e-05	9.60356e-06	1.09948e-05	1.3028e-05	5.40999e-05	1.29037e-05	1.20849e-05	2.46348e-05	1.57709e-05	0
Nakamurella	2.95369e-05	1.71928e-05	1.11215e-05	0	2.32761e-05	1.69961e-05	0	0	1.30972e-05	0	9.51638e-06	2.88931e-05	1.74435e-05	2.1193e-05	0	3.05076e-05	0	0	3.78835e-05	3.46855e-05	1.24716e-05	1.43668e-05	1.87552e-05	2.9434e-05	0	7.2472e-05	3.84143e-05	1.09948e-05	3.90839e-05	7.21332e-05	1.29037e-05	0	8.62218e-05	4.73126e-05	5.41998e-05
Roseimicrobium	9.84562e-06	3.43855e-05	0	0	0	1.69961e-05	1.79314e-05	2.08808e-05	1.30972e-05	5.60763e-05	5.70983e-05	0.000115572	5.23304e-05	1.05965e-05	0	9.15227e-05	2.12918e-05	0	9.47086e-06	8.67137e-06	1.24716e-05	0	0	1.96227e-05	0	0	4.80178e-05	1.09948e-05	1.3028e-05	1.80333e-05	0	3.62547e-05	2.46348e-05	4.73126e-05	1.355e-05
Dokdonella	1.96912e-05	0	2.2243e-05	1.10762e-05	3.49142e-05	0	8.96572e-06	4.17615e-05	9.16806e-05	9.34606e-06	9.51638e-06	4.81552e-05	1.74435e-05	1.05965e-05	4.02755e-05	4.57614e-05	3.19377e-05	1.04947e-05	2.84126e-05	8.67137e-06	0	4.31004e-05	2.81328e-05	9.81133e-06	2.76771e-05	2.07063e-05	2.88107e-05	0	3.90839e-05	1.80333e-05	0	0	0	0	0
Magnetospirillum	0	0	5.56075e-05	0	1.16381e-05	0	8.96572e-06	0	9.16806e-05	6.54224e-05	2.85491e-05	9.63104e-05	0	2.1193e-05	0	2.28807e-05	0	0	2.84126e-05	2.60141e-05	3.74149e-05	0	9.37761e-06	9.81133e-06	0	1.03531e-05	0	0	0	0	0	1.20849e-05	3.69522e-05	0	4.06499e-05
Caballeronia	9.84562e-06	1.71928e-05	2.2243e-05	0	3.49142e-05	0	1.79314e-05	2.08808e-05	2.61945e-05	2.80382e-05	9.51638e-06	1.92621e-05	0	1.05965e-05	1.00689e-05	9.91496e-05	2.12918e-05	4.19789e-05	9.47086e-06	8.67137e-06	0	0	9.37761e-06	0	1.38385e-05	2.07063e-05	1.92071e-05	0	2.60559e-05	1.80333e-05	1.29037e-05	1.20849e-05	3.69522e-05	1.57709e-05	0
Niveispirillum	0	1.71928e-05	1.11215e-05	0	0	0	0	0	1.30972e-05	0	0	0	0	0	0	7.62689e-06	2.12918e-05	0	9.47086e-06	0	1.24716e-05	0	2.81328e-05	0	0	3.10594e-05	9.60356e-06	1.09948e-05	0	1.80333e-05	0	0.000132934	0	0.000205021	5.41998e-05
Rhizorhabdus	1.96912e-05	0	2.2243e-05	1.10762e-05	1.16381e-05	1.69961e-05	1.79314e-05	1.04404e-05	1.30972e-05	1.86921e-05	0	8.66793e-05	0	0	0	1.52538e-05	2.12918e-05	4.19789e-05	9.47086e-06	1.73427e-05	1.24716e-05	0	9.37761e-06	3.92453e-05	0	6.21189e-05	9.60356e-06	1.09948e-05	2.60559e-05	0	0	2.41698e-05	2.46348e-05	0	1.355e-05
Paenibacillus	0	0	0	3.32285e-05	2.32761e-05	3.39922e-05	8.96572e-06	0	0	9.34606e-06	0	1.92621e-05	0	1.05965e-05	1.00689e-05	7.62689e-06	0	2.09894e-05	1.89417e-05	2.60141e-05	1.24716e-05	0	4.6888e-05	9.81133e-06	0	1.03531e-05	5.76214e-05	2.19896e-05	1.3028e-05	5.40999e-05	1.29037e-05	0	6.1587e-05	1.57709e-05	0
Methylobacterium	0	0	0	0	4.65522e-05	1.69961e-05	8.96572e-06	0	1.30972e-05	0	9.51638e-06	9.63104e-06	0	0	2.01377e-05	0	0	0	0	0	1.24716e-05	0	1.87552e-05	9.81133e-06	8.30312e-05	1.03531e-05	0	0	3.90839e-05	0	1.29037e-05	8.45942e-05	3.69522e-05	0	4.06499e-05
Bacillus	0	1.71928e-05	0	1.10762e-05	2.32761e-05	0	0	1.04404e-05	0	9.34606e-06	9.51638e-06	9.63104e-06	0	1.05965e-05	0	2.28807e-05	1.06459e-05	0	2.84126e-05	0	0	0	2.81328e-05	1.96227e-05	1.38385e-05	4.14126e-05	0	2.19896e-05	1.3028e-05	9.01664e-05	0	0	4.92696e-05	0	2.70999e-05
Methylococcus	0	0	0	0	0	0	0	0	0	0	0	1.92621e-05	0	4.23859e-05	0	0	0	0	2.84126e-05	6.9371e-05	0.00014966	0	0	0	0	0	1.92071e-05	6.59689e-05	0	0	1.29037e-05	0	0	0	5.41998e-05
Pseudorhodoplanes	0	0	1.11215e-05	0	0	0	1.79314e-05	0	0	9.34606e-06	9.51638e-06	2.88931e-05	0	1.05965e-05	0	2.28807e-05	2.12918e-05	0	1.89417e-05	1.73427e-05	2.49433e-05	0	2.81328e-05	9.81133e-06	0	0	9.60356e-06	4.39792e-05	0	1.80333e-05	0	0	4.92696e-05	4.73126e-05	2.70999e-05
Planctopirus	1.96912e-05	0	0	0	0	0	2.68971e-05	0	1.30972e-05	1.86921e-05	2.85491e-05	9.63104e-06	0	4.23859e-05	1.00689e-05	7.62689e-06	1.06459e-05	1.04947e-05	1.89417e-05	1.73427e-05	1.24716e-05	0	9.37761e-06	1.96227e-05	1.38385e-05	2.07063e-05	9.60356e-06	0	1.3028e-05	0	1.29037e-05	1.20849e-05	2.46348e-05	1.57709e-05	2.70999e-05
Nitrososphaera	9.84562e-06	1.71928e-05	0	0	4.65522e-05	1.69961e-05	1.79314e-05	4.17615e-05	0	9.34606e-06	1.90328e-05	0	5.23304e-05	1.05965e-05	1.00689e-05	7.62689e-06	2.12918e-05	0	0	0	0	1.43668e-05	1.87552e-05	0	0	1.03531e-05	1.92071e-05	0	0	0	0	2.41698e-05	1.23174e-05	1.57709e-05	1.355e-05
Pseudogulbenkiania	0	0	1.11215e-05	1.10762e-05	0	0	0	7.30826e-05	1.30972e-05	9.34606e-06	0	0	0	1.05965e-05	2.01377e-05	6.10151e-05	1.06459e-05	0	9.47086e-06	0	0	1.43668e-05	9.37761e-06	0	2.76771e-05	1.03531e-05	9.60356e-06	0	1.3028e-05	0	1.29037e-05	2.41698e-05	0	0	1.355e-05
Streptomyces	9.84562e-06	0	0	0	2.32761e-05	6.79844e-05	0	2.08808e-05	0	0	9.51638e-06	0	1.74435e-05	0	1.00689e-05	7.62689e-06	1.06459e-05	1.04947e-05	9.47086e-06	8.67137e-06	0	0	9.37761e-06	0	0	2.07063e-05	9.60356e-06	0	2.60559e-05	5.40999e-05	0	0	2.46348e-05	0	0
Methylovulum	0	0	0	0	0	0	0	0	0	0	0	0	0	0	0	0	0	0	1.89417e-05	8.67137e-05	0.000236961	0	0	0	0	0	0	0	0	0	0	0	0	0	0
Dyella	0	1.71928e-05	1.11215e-05	1.10762e-05	0	0	8.96572e-06	2.08808e-05	2.61945e-05	0	1.90328e-05	2.88931e-05	0	1.05965e-05	5.03444e-05	1.52538e-05	1.06459e-05	0	9.47086e-06	0	0	1.43668e-05	9.37761e-06	9.81133e-06	0	0	0	0	1.3028e-05	1.80333e-05	0	2.41698e-05	0	0	0
Shinella	0	0	0	1.10762e-05	0	1.69961e-05	8.96572e-06	2.08808e-05	5.23889e-05	0	2.85491e-05	0	0	1.05965e-05	1.00689e-05	3.05076e-05	1.06459e-05	0	9.47086e-06	1.73427e-05	1.24716e-05	0	9.37761e-06	1.96227e-05	0	0	0	0	2.60559e-05	0	0	0	0	3.15418e-05	0
Asticcacaulis	1.96912e-05	0	0	0	1.16381e-05	0	0	1.04404e-05	0	0	0	3.85241e-05	1.74435e-05	0	3.02066e-05	1.52538e-05	1.06459e-05	0	0	1.73427e-05	1.24716e-05	4.31004e-05	1.87552e-05	0	1.38385e-05	1.03531e-05	9.60356e-06	1.09948e-05	2.60559e-05	0	0	0	0	0	0
Aquisphaera	0	0	0	0	2.32761e-05	0	8.96572e-06	2.08808e-05	1.30972e-05	0	0	0	1.74435e-05	1.05965e-05	0	7.62689e-06	2.12918e-05	0	0	0	0	0	9.37761e-06	1.96227e-05	1.38385e-05	0	2.88107e-05	0	0	1.80333e-05	0	3.62547e-05	2.46348e-05	1.57709e-05	1.355e-05
Beijerinckia	1.96912e-05	1.71928e-05	2.2243e-05	0	0	0	8.96572e-06	3.13211e-05	1.30972e-05	9.34606e-06	9.51638e-06	9.63104e-06	3.4887e-05	0	0	0	0	0	0	0	2.49433e-05	0	0	1.96227e-05	0	2.07063e-05	1.92071e-05	1.09948e-05	0	0	0	0	0	0	1.355e-05
Achromobacter	0	0	0	0	0	0	8.96572e-06	0	0	0	0	2.88931e-05	0	2.1193e-05	0	1.52538e-05	3.19377e-05	0	9.47086e-06	0	0	0	1.87552e-05	0	1.38385e-05	1.03531e-05	2.88107e-05	0	0	1.80333e-05	0	2.41698e-05	2.46348e-05	1.57709e-05	0
Blastococcus	0	0	0	1.10762e-05	0	6.79844e-05	8.96572e-06	0	0	1.86921e-05	0	9.63104e-06	0	0	0	0	0	1.04947e-05	9.47086e-06	1.73427e-05	1.24716e-05	0	2.81328e-05	0	0	2.07063e-05	1.92071e-05	0	0	0	1.29037e-05	0	1.23174e-05	0	0
Singulisphaera	0	1.71928e-05	1.11215e-05	2.21523e-05	2.32761e-05	1.69961e-05	8.96572e-06	2.08808e-05	2.61945e-05	1.86921e-05	0	0	0	0	1.00689e-05	7.62689e-06	0	1.04947e-05	0	8.67137e-06	0	0	9.37761e-06	2.9434e-05	0	0	9.60356e-06	0	0	0	0	0	0	0	0
Mucilaginibacter	0	0	2.2243e-05	0	0	0	0	3.13211e-05	7.85834e-05	9.34606e-06	0	0	0	0	0	0	2.12918e-05	1.04947e-05	0	0	0	2.87336e-05	9.37761e-06	0	0	0	0	0	1.3028e-05	0	0	1.20849e-05	0	0	0
Solitalea	0	0	0	2.21523e-05	2.32761e-05	6.79844e-05	0	1.04404e-05	0	0	0	9.63104e-06	0	0	2.01377e-05	2.28807e-05	1.06459e-05	0	0	8.67137e-06	0	0	0	9.81133e-06	0	0	9.60356e-06	0	1.3028e-05	0	0	0	0	0	0
Pedobacter	0	0	0	0	0	0.000152965	0	0	1.30972e-05	0	0	0	0	0	0	0	3.19377e-05	0	0	0	0	1.43668e-05	0	0	0	0	0	0	0	0	0	0	0	0	0
Chitinophaga	0	0	1.11215e-05	0	0	0	0	2.08808e-05	5.23889e-05	9.34606e-06	0	9.63104e-06	0	1.05965e-05	2.01377e-05	2.28807e-05	1.06459e-05	0	0	0	0	0	1.87552e-05	0	0	0	0	0	0	0	0	0	1.23174e-05	0	0
Thermomonas	9.84562e-06	0	1.11215e-05	1.10762e-05	1.16381e-05	1.69961e-05	2.68971e-05	1.04404e-05	0	0	9.51638e-06	0	0	0	1.00689e-05	7.62689e-06	0	0	9.47086e-06	0	0	1.43668e-05	0	0	0	0	9.60356e-06	0	1.3028e-05	0	0	2.41698e-05	0	0	0
Burkholderia	0	0	0	0	4.65522e-05	0	8.96572e-06	2.08808e-05	2.61945e-05	0	0	9.63104e-06	0	0	1.00689e-05	0	0	1.04947e-05	0	0	0	0	9.37761e-06	9.81133e-06	0	0	0	0	1.3028e-05	1.80333e-05	0	1.20849e-05	0	0	0
Stenotrophomonas	9.84562e-06	1.71928e-05	2.2243e-05	2.21523e-05	1.16381e-05	0	0	0	2.61945e-05	0	9.51638e-06	0	0	0	0	7.62689e-06	0	0	0	8.67137e-06	0	0	0	9.81133e-06	0	0	0	0	2.60559e-05	0	0	2.41698e-05	0	0	0
Cellulomonas	9.84562e-06	0	0	0	1.16381e-05	0	8.96572e-06	0	1.30972e-05	0	0	1.92621e-05	0	0	0	0	0	1.04947e-05	0	0	0	0	0	1.96227e-05	0	0	9.60356e-06	0	0	1.80333e-05	1.29037e-05	2.41698e-05	1.23174e-05	1.57709e-05	0
Immundisolibacter	0	0	2.2243e-05	0	5.81903e-05	0	1.79314e-05	0	0	9.34606e-06	0	9.63104e-06	1.74435e-05	0	0	0	0	0	0	0	0	0	0	0	0	0	0	0	2.60559e-05	0	0	0	0	0	0
Phreatobacter	9.84562e-06	0	0	0	0	0	8.96572e-06	0	1.30972e-05	2.80382e-05	2.85491e-05	9.63104e-06	0	0	0	0	0	0	0	0	0	0	1.87552e-05	0	1.38385e-05	0	9.60356e-06	0	0	0	0	0	0	0	0
Deinococcus	1.96912e-05	0	0	0	3.49142e-05	1.69961e-05	0	0	0	0	0	9.63104e-06	0	0	0	2.28807e-05	0	0	9.47086e-06	8.67137e-06	0	0	0	0	0	0	0	0	0	0	0	1.20849e-05	0	0	0
Nitrosospira	0	0	1.11215e-05	0	1.16381e-05	1.69961e-05	8.96572e-06	0	2.61945e-05	0	9.51638e-06	0	0	2.1193e-05	0	1.52538e-05	0	0	0	0	0	0	0	0	0	0	9.60356e-06	0	0	0	0	0	0	0	0
Baekduia	9.84562e-06	0	0	0	1.16381e-05	0	0	0	0	0	0	9.63104e-06	0	0	0	0	0	0	0	8.67137e-06	0	0	1.87552e-05	9.81133e-06	1.38385e-05	3.10594e-05	9.60356e-06	0	0	0	0	0	0	0	0
Marinobacter	0	0	0	0	0	0	0	0	0	0	0	0	0	0	0	0	0	0	0	0	0	0	9.37761e-05	0	0	0	0	0	0	1.80333e-05	0	0	0	0	0
Rhodocytophaga	9.84562e-06	0	0	0	0	3.39922e-05	0	0	0	0	0	0	1.74435e-05	0	1.00689e-05	7.62689e-06	1.06459e-05	0	0	0	0	0	0	0	0	0	0	0	0	0	0	0	0	1.57709e-05	0
Gemmatirosa	9.84562e-06	0	1.11215e-05	1.10762e-05	1.16381e-05	0	0	1.04404e-05	0	0	0	0	0	2.1193e-05	0	0	0	0	9.47086e-06	8.67137e-06	0	0	0	9.81133e-06	0	0	0	0	0	0	0	0	0	0	0
Rhodanobacter	0	0	0	0	1.16381e-05	5.09883e-05	0	0	1.30972e-05	0	0	0	0	0	0	0	0	0	0	0	0	0	9.37761e-06	0	0	0	0	0	1.3028e-05	0	0	0	0	0	0
Terriglobus	0	0	0	0	1.16381e-05	0	8.96572e-06	0	0	0	0	0	0	2.1193e-05	1.00689e-05	0	0	0	0	8.67137e-06	0	0	9.37761e-06	0	0	0	9.60356e-06	0	0	1.80333e-05	0	0	0	0	0
Acidiphilium	0	0	0	0	0	0	0	1.04404e-05	0	1.86921e-05	1.90328e-05	9.63104e-06	1.74435e-05	2.1193e-05	0	0	0	0	0	0	0	0	0	0	0	0	0	0	0	0	0	0	0	0	0
Pontibacter	0	0	0	0	0	5.09883e-05	0	0	0	0	0	0	0	0	0	7.62689e-06	0	0	0	0	0	0	9.37761e-06	0	0	0	0	0	0	0	0	1.20849e-05	1.23174e-05	0	0
Plesiomonas	9.84562e-06	0	0	0	0	0	0	0	0	0	0	0	0	0	0	3.81345e-05	0	0	0	0	0	0	0	0	0	0	0	4.39792e-05	0	0	0	0	0	0	0
Nocardia	0	0	0	0	1.16381e-05	0	0	0	1.30972e-05	0	0	0	0	0	1.00689e-05	1.52538e-05	0	0	0	0	0	0	2.81328e-05	0	0	0	9.60356e-06	0	0	0	0	0	0	0	0
Methylorubrum	0	0	0	0	1.16381e-05	0	0	1.04404e-05	0	0	0	0	0	0	0	0	1.06459e-05	0	0	8.67137e-06	0	0	0	0	0	0	9.60356e-06	0	0	1.80333e-05	0	1.20849e-05	0	0	0
Aminobacter	0	1.71928e-05	0	0	0	0	0	2.08808e-05	0	0	0	9.63104e-06	0	0	0	0	0	0	0	0	0	0	0	0	0	0	0	0	0	0	0	0	0	3.15418e-05	0
Xanthomonas	0	0	0	0	1.16381e-05	0	0	0	0	0	0	9.63104e-06	0	0	0	7.62689e-06	0	0	1.89417e-05	0	0	0	0	0	0	1.03531e-05	0	0	0	1.80333e-05	0	0	0	0	0
Gordonia	0	0	0	0	0	0	8.96572e-06	0	0	0	0	9.63104e-06	0	0	0	0	0	0	0	8.67137e-06	0	0	9.37761e-06	0	1.38385e-05	0	0	1.09948e-05	0	0	1.29037e-05	0	0	0	0
Lentzea	0	1.71928e-05	0	0	1.16381e-05	1.69961e-05	0	0	0	0	0	0	1.74435e-05	0	0	0	0	0	9.47086e-06	0	0	0	0	0	0	0	0	0	0	0	0	0	0	0	0
Filomicrobium	0	0	0	0	0	0	8.96572e-06	1.04404e-05	0	0	0	0	0	0	0	0	0	0	9.47086e-06	8.67137e-06	0	0	0	9.81133e-06	0	1.03531e-05	0	0	0	0	1.29037e-05	0	0	0	0
Anaerohalosphaera	0	0	0	0	0	0	8.96572e-06	0	0	0	0	9.63104e-06	0	1.05965e-05	0	0	0	1.04947e-05	9.47086e-06	0	0	0	0	0	0	0	1.92071e-05	0	0	0	0	0	0	0	0
Myxococcus	0	0	0	0	0	1.69961e-05	0	0	0	0	0	0	0	0	0	0	0	0	0	0	0	0	0	9.81133e-06	0	0	0	0	1.3028e-05	0	0	1.20849e-05	1.23174e-05	0	0
Paracoccus	0	0	0	0	1.16381e-05	0	0	0	0	0	0	0	0	0	0	7.62689e-06	0	0	0	0	0	0	0	0	1.38385e-05	0	0	0	0	0	0	0	0	1.57709e-05	1.355e-05
Streptacidiphilus	0	0	0	0	0	0	0	0	0	0	0	0	0	0	0	0	0	0	0	0	0	0	0	0	0	0	0	0	1.3028e-05	3.60666e-05	0	0	1.23174e-05	0	0
Actinoplanes	0	0	0	0	0	0	0	0	0	0	0	0	0	1.05965e-05	0	0	0	0	0	0	0	0	0	0	0	0	0	0	0	0	0	0	0	4.73126e-05	0
Rhodopirellula	0	0	0	0	0	1.69961e-05	0	0	0	0	0	0	0	1.05965e-05	0	7.62689e-06	0	1.04947e-05	0	0	0	0	9.37761e-06	0	0	0	0	0	0	0	0	0	0	0	0
Algoriphagus	0	0	0	0	0	0	0	0	0	0	0	0	0	0	0	0	1.06459e-05	0	0	0	0	1.43668e-05	0	9.81133e-06	0	0	0	0	0	1.80333e-05	0	0	0	0	0
Roseimaritima	0	1.71928e-05	0	0	0	0	0	1.04404e-05	0	0	0	0	0	0	0	0	1.06459e-05	0	0	0	0	0	0	0	0	0	9.60356e-06	0	0	0	0	0	0	0	0
Alcanivorax	0	0	0	1.10762e-05	1.16381e-05	0	8.96572e-06	0	1.30972e-05	0	0	0	0	0	0	0	0	0	0	0	0	0	0	0	0	0	0	0	0	0	0	0	0	0	0
Methylomicrobium	0	0	0	0	0	0	0	0	0	0	0	0	0	0	0	0	0	0	0	8.67137e-06	0	0	0	0	0	0	9.60356e-06	0	0	0	0	0	1.23174e-05	0	1.355e-05
Sporosarcina	0	0	0	0	0	1.69961e-05	0	0	0	0	0	0	0	0	0	7.62689e-06	0	0	0	8.67137e-06	0	0	0	0	0	1.03531e-05	0	0	0	0	0	0	0	0	0
Rhodopseudomonas	0	0	0	1.10762e-05	0	0	0	0	0	0	0	0	0	1.05965e-05	0	7.62689e-06	0	0	0	0	0	0	0	0	0	0	0	0	0	0	0	0	1.23174e-05	0	0
Sulfurospirillum	0	0	0	0	0	0	0	0	0	0	0	1.92621e-05	0	0	0	0	0	0	0	0	0	0	0	0	0	0	0	0	0	1.80333e-05	0	0	0	0	0
Archangium	0	0	0	0	0	0	0	0	0	0	0	9.63104e-06	1.74435e-05	0	0	0	0	0	0	0	0	0	9.37761e-06	0	0	0	0	0	0	0	0	0	0	0	0
Solimonas	0	0	0	0	1.16381e-05	0	0	0	0	0	0	0	0	0	0	0	0	0	0	0	0	0	0	0	0	0	0	0	0	0	0	1.20849e-05	1.23174e-05	0	0
Amycolatopsis	0	0	0	0	0	0	0	0	0	0	0	0	0	0	0	0	0	0	0	0	0	0	0	0	0	1.03531e-05	0	0	1.3028e-05	0	0	0	1.23174e-05	0	0
Geobacillus	0	0	0	0	0	0	0	0	0	0	0	0	0	1.05965e-05	0	0	0	0	0	0	0	0	0	0	0	1.03531e-05	0	0	0	0	0	0	1.23174e-05	0	0
Paraflavitalea	0	0	0	0	0	0	0	0	0	0	0	0	0	1.05965e-05	0	0	0	0	0	0	0	0	0	0	0	0	9.60356e-06	0	1.3028e-05	0	0	0	0	0	0
Cytophaga	0	0	0	0	0	0	0	0	0	0	0	0	0	0	0	0	0	0	0	0	0	1.43668e-05	0	0	0	0	0	0	0	1.80333e-05	0	0	0	0	0
Truepera	0	0	1.11215e-05	0	0	0	8.96572e-06	1.04404e-05	0	0	0	0	0	0	0	0	0	0	0	0	0	0	0	0	0	0	0	0	0	0	0	0	0	0	0
Streptosporangium	0	0	0	0	0	0	0	0	1.30972e-05	0	0	0	0	0	0	7.62689e-06	0	0	0	0	0	0	0	0	0	0	9.60356e-06	0	0	0	0	0	0	0	0
Methyloceanibacter	0	0	0	0	0	0	0	0	0	0	0	0	0	0	0	0	0	1.04947e-05	9.47086e-06	0	0	0	0	0	0	1.03531e-05	0	0	0	0	0	0	0	0	0
Delftia	9.84562e-06	0	0	0	0	0	0	0	0	0	0	0	0	0	0	7.62689e-06	0	0	0	0	0	0	0	0	0	0	0	0	0	0	0	1.20849e-05	0	0	0
Brevibacillus	0	0	0	0	1.16381e-05	1.69961e-05	0	0	0	0	0	0	0	0	0	0	0	0	0	0	0	0	0	0	0	0	0	0	0	0	0	0	0	0	0
Lysinibacillus	0	0	0	0	0	0	0	0	0	0	0	0	1.74435e-05	0	0	0	1.06459e-05	0	0	0	0	0	0	0	0	0	0	0	0	0	0	0	0	0	0
Brucella	0	0	0	0	0	0	0	0	0	0	0	9.63104e-06	0	0	0	7.62689e-06	0	1.04947e-05	0	0	0	0	0	0	0	0	0	0	0	0	0	0	0	0	0
Kibdelosporangium	0	0	0	0	0	1.69961e-05	0	0	0	0	0	0	0	0	0	0	1.06459e-05	0	0	0	0	0	0	0	0	0	0	0	0	0	0	0	0	0	0
Spirosoma	0	0	0	0	0	0	0	0	1.30972e-05	0	0	0	0	0	0	0	0	0	0	0	0	0	0	0	0	0	0	0	0	0	0	0	0	0	1.355e-05
Glycocaulis	0	0	0	0	0	0	0	0	0	0	0	0	0	0	0	0	2.12918e-05	0	0	0	0	0	0	0	0	0	0	0	0	0	0	0	0	0	0
Geodermatophilus	0	0	0	0	0	0	8.96572e-06	0	0	0	0	0	0	0	0	0	0	0	0	0	0	0	0	0	0	0	0	0	0	0	0	0	1.23174e-05	0	0
Nocardiopsis	0	0	0	0	1.16381e-05	0	0	0	0	0	0	9.63104e-06	0	0	0	0	0	0	0	0	0	0	0	0	0	0	0	0	0	0	0	0	0	0	0
Cystobacter	0	0	0	0	1.16381e-05	0	0	0	0	0	0	9.63104e-06	0	0	0	0	0	0	0	0	0	0	0	0	0	0	0	0	0	0	0	0	0	0	0
Alicyclobacillus	0	0	0	0	0	0	0	0	0	0	0	0	0	2.1193e-05	0	0	0	0	0	0	0	0	0	0	0	0	0	0	0	0	0	0	0	0	0
Acidobacterium	0	0	0	0	0	0	0	0	0	0	0	0	0	0	0	0	0	0	0	8.67137e-06	1.24716e-05	0	0	0	0	0	0	0	0	0	0	0	0	0	0
Paludisphaera	0	0	0	0	0	0	0	1.04404e-05	0	0	0	0	0	0	0	0	0	0	0	0	0	0	0	0	0	1.03531e-05	0	0	0	0	0	0	0	0	0
Cohnella	0	0	0	0	0	0	8.96572e-06	0	0	0	0	0	0	0	0	0	0	0	0	0	0	0	0	9.81133e-06	0	0	0	0	0	0	0	0	0	0	0
Micromonospora	0	0	0	0	0	0	0	0	0	0	0	0	0	0	0	0	0	0	0	0	0	0	0	0	0	0	0	0	0	1.80333e-05	0	0	0	0	0
Microlunatus	0	0	0	0	0	0	0	0	0	0	0	0	0	0	0	0	0	0	0	0	0	1.43668e-05	0	0	0	0	0	0	0	0	0	0	0	0	0
Gracilibacillus	0	0	0	0	0	0	0	0	0	0	0	0	0	0	0	0	0	0	0	0	0	0	0	0	1.38385e-05	0	0	0	0	0	0	0	0	0	0
Methylocella	0	0	0	0	0	0	0	0	0	0	0	0	0	0	0	0	0	0	0	0	0	0	0	0	0	0	0	0	1.3028e-05	0	0	0	0	0	0
Dietzia	0	0	0	0	0	0	0	0	0	0	0	0	0	0	0	0	0	0	0	0	0	0	0	0	0	0	0	0	1.3028e-05	0	0	0	0	0	0
Niabella	0	0	1.11215e-05	0	0	0	0	0	0	0	0	0	0	0	0	0	0	0	0	0	0	0	0	0	0	0	0	0	0	0	0	0	0	0	0
Nonomuraea	0	0	0	0	0	0	0	0	0	0	0	0	0	0	0	0	0	0	0	0	0	0	0	0	0	0	0	1.09948e-05	0	0	0	0	0	0	0
Oligotropha	0	0	0	0	0	0	0	0	0	0	0	0	0	0	0	0	1.06459e-05	0	0	0	0	0	0	0	0	0	0	0	0	0	0	0	0	0	0
Pandoraea	0	0	0	0	0	0	0	0	0	0	0	0	0	1.05965e-05	0	0	0	0	0	0	0	0	0	0	0	0	0	0	0	0	0	0	0	0	0
Nitrobacter	0	0	0	0	0	0	0	1.04404e-05	0	0	0	0	0	0	0	0	0	0	0	0	0	0	0	0	0	0	0	0	0	0	0	0	0	0	0
Planococcus	0	0	0	0	0	0	0	1.04404e-05	0	0	0	0	0	0	0	0	0	0	0	0	0	0	0	0	0	0	0	0	0	0	0	0	0	0	0
Conexibacter	0	0	0	0	0	0	0	0	0	0	9.51638e-06	0	0	0	0	0	0	0	0	0	0	0	0	0	0	0	0	0	0	0	0	0	0	0	0
Croceicoccus	0	0	0	0	0	0	0	0	0	0	0	0	0	0	0	0	0	0	9.47086e-06	0	0	0	0	0	0	0	0	0	0	0	0	0	0	0	0
Glutamicibacter	0	0	0	0	0	0	0	0	0	0	0	0	0	0	0	0	0	0	0	0	0	0	9.37761e-06	0	0	0	0	0	0	0	0	0	0	0	0
Acidithiobacillus	0	0	0	0	0	0	0	0	0	9.34606e-06	0	0	0	0	0	0	0	0	0	0	0	0	0	0	0	0	0	0	0	0	0	0	0	0	0
Tuwongella	0	0	0	0	0	0	0	0	0	0	0	0	0	0	0	0	0	0	0	8.67137e-06	0	0	0	0	0	0	0	0	0	0	0	0	0	0	0
Methylocaldum	0	0	0	0	0	0	0	0	0	0	0	0	0	0	0	7.62689e-06	0	0	0	0	0	0	0	0	0	0	0	0	0	0	0	0	0	0	0

## Sheet: M00528
	C0	C2	C5	C8	C11	C14	C17	MP0	MP2	MP5	MP8	MP11	MP14	MP17	EP0	EP2	EP5	EP8	EP11	EP14	EP17	PP0	PP2	PP5	PP8	PP11	PP14	PP17	BP0	BP2	BP5	BP8	BP11	BP14	BP17
Nitrospira	0.00685255	0.0189464	0.0118444	0.010622	0.02984	0.0216486	0.0318104	0.0184273	0.0140664	0.00575717	0.00914524	0.0115958	0.0116522	0.0165729	0.010814	0.0188384	0.00382187	0.0045652	0.0111756	0.00814242	0.00492629	0.00828963	0.0205557	0.0110377	0.00181285	0.00953525	0.0119756	0.00222095	0.00970583	0.0127676	0.00160006	0.0107193	0.0115784	0.00517285	0.00586713
Methylocystis	0	3.43855e-05	3.33645e-05	1.10762e-05	3.49142e-05	0	0	0	1.30972e-05	0	0	6.74172e-05	6.97739e-05	4.23859e-05	0	3.81345e-05	2.12918e-05	4.19789e-05	0.000161005	0.000225456	0.000586166	0	2.81328e-05	0	0	8.28252e-05	0.000230486	0.000142933	0	0	1.29037e-05	1.20849e-05	4.92696e-05	0.000189251	0.000162599
Nitrosomonas	0	3.43855e-05	1.11215e-05	0	4.65522e-05	0	0	1.04404e-05	6.54862e-05	2.80382e-05	9.51638e-06	1.92621e-05	3.4887e-05	5.29824e-05	3.02066e-05	0.00012203	0	0	9.47086e-06	2.60141e-05	2.49433e-05	2.87336e-05	6.56433e-05	1.96227e-05	0	1.03531e-05	9.60356e-06	1.09948e-05	1.3028e-05	5.40999e-05	1.29037e-05	1.20849e-05	2.46348e-05	1.57709e-05	0
Methylococcus	0	0	0	0	0	0	0	0	0	0	0	1.92621e-05	0	4.23859e-05	0	0	0	0	2.84126e-05	6.9371e-05	0.00014966	0	0	0	0	0	1.92071e-05	6.59689e-05	0	0	1.29037e-05	0	0	0	5.41998e-05
Nitrosospira	0	0	1.11215e-05	0	1.16381e-05	1.69961e-05	8.96572e-06	0	2.61945e-05	0	9.51638e-06	0	0	2.1193e-05	0	1.52538e-05	0	0	0	0	0	0	0	0	0	0	9.60356e-06	0	0	0	0	0	0	0	0
Methylomicrobium	0	0	0	0	0	0	0	0	0	0	0	0	0	0	0	0	0	0	0	8.67137e-06	0	0	0	0	0	0	9.60356e-06	0	0	0	0	0	1.23174e-05	0	1.355e-05
Nitrobacter	0	0	0	0	0	0	0	1.04404e-05	0	0	0	0	0	0	0	0	0	0	0	0	0	0	0	0	0	0	0	0	0	0	0	0	0	0	0
Methylocaldum	0	0	0	0	0	0	0	0	0	0	0	0	0	0	0	7.62689e-06	0	0	0	0	0	0	0	0	0	0	0	0	0	0	0	0	0	0	0

## Sheet: M00529
	C0	C2	C5	C8	C11	C14	C17	MP0	MP2	MP5	MP8	MP11	MP14	MP17	EP0	EP2	EP5	EP8	EP11	EP14	EP17	PP0	PP2	PP5	PP8	PP11	PP14	PP17	BP0	BP2	BP5	BP8	BP11	BP14	BP17
Pseudomonas	0.00939371	0.00753043	0.00344766	0.00459882	0.000174571	0.000606081	0.000618634	0.00215072	0.000929904	0.0121686	0.0038351	0.0015506	0.000156991	0.00318	0.0105622	0.000854212	0.0103797	0.00132234	0.00261396	0.00118798	8.73e-05	0.00546656	0.00301959	0.00151095	0.00454873	0.000207063	0.00083551	0.00358431	0.00222908	0.00187546	0.00608411	0.0145744	0.000197078	0.000346959	0.00588068
Hydrogenophaga	0.000177221	0.000206313	0.000389252	0.00014399	0.000302589	3.39922e-05	0.00127313	0.000114844	0.00352316	0.00113087	0.00172246	0.00340939	0.00448298	0.00163186	0.000120826	0.00141098	0.000521648	0.00110195	0.00243401	0.00510744	0.00760769	0.000129301	0.0020537	0.00127547	0.000650411	0.00653283	0.00274662	0.00204504	0.000182391	0.00308369	0.00144522	0.00209069	0.00495159	0.00271259	0.00310294
Dechloromonas	0.000255986	0.000206313	0.000767383	0.000420894	0.000814664	6.79844e-05	0.000430354	0.000970955	0.00193839	0.000429919	0.000637597	0.0015506	0.00305261	0.00111263	0.000694752	0.009587	0.000489711	0.00682157	0.000975499	0.00164756	0.00430271	0.000229869	0.00110656	0.000510189	0.000318286	0.00348901	0.00521474	0.00225394	0.000390839	0.000775431	0.000400015	0.00211486	0.00284532	0.00402158	0.00401079
Hyphomicrobium	0.000433207	0.000945602	0.000367009	0.000465199	0.00112889	0.00188657	0.00242074	0.00084567	0.00201697	0.000803761	0.0017986	0.00162765	0.00226765	0.00226765	0.000563857	0.00136521	0.00077715	0.00103898	0.00236772	0.00270547	0.00265646	0.000632138	0.00136913	0.00130491	0.00047051	0.00264005	0.00195913	0.00183613	0.00070351	0.000973798	0.000645186	0.000592159	0.00282068	0.00506245	0.00367204
Bradyrhizobium	0.000255986	0.000584554	0.000322523	0.000343361	0.000814664	0.000900794	0.000986229	0.000793469	0.00104778	0.000364496	0.000837441	0.00162765	0.00158736	0.00137754	0.000573926	0.00104488	0.000745212	0.000430284	0.00124068	0.00121399	0.000972787	0.000215502	0.000890873	0.000716227	0.000221417	0.000942136	0.000960356	0.000912569	0.000390839	0.000414766	0.000322593	0.000362547	0.000739044	0.000835857	0.0010298
Undibacterium	0.00141777	0.00030947	0.000378131	0.000653493	3.49142e-05	0	8.96572e-06	0.000240129	0.000406014	0.00149537	0.000989703	0.000317824	1.74435e-05	1.05965e-05	0.00102702	0.000373718	0.000532294	0.00095502	4.73543e-05	0.00038154	0.000374149	0.00443934	0.000693943	0.000264906	6.91927e-05	1.03531e-05	0.000182468	0.000252881	0.000964069	0.000198366	0.00020646	0.00276744	0	9.46253e-05	0.000149049
Aromatoleum	5.90737e-05	0.000103157	0.000344766	0.000199371	0.00224615	0	0.00103106	0.000219248	0.000497695	0.000177575	0.000180811	0.000587493	0.000523304	0.000307298	0.000211446	0.00177707	0.000191626	0.000251873	0.00115544	0.000754409	0.000685939	0.000172401	0.000572034	0.000176604	8.30312e-05	0.00124238	0.0005378	0.000109948	0.00013028	0.000504932	0.000141941	0.000326292	0.00110857	0.000441585	0.000352299
Aquabacterium	0.000147684	6.87711e-05	0.000333645	8.86093e-05	0.000453884	1.69961e-05	0.0003138	0.000344532	0.000982293	0.000177575	0.000390171	0.000731959	0.00130826	0.000603999	0.000110758	0.000327956	0.000202272	0.000367315	0.000634548	0.00111861	0.00108503	0.000215502	0.000572034	0.000323774	0.000152224	0.000807545	0.000364935	0.000252881	0.000182391	0.000703298	0.000167748	0.000422971	0.00101003	0.000441585	0.000623298
Thauera	0	0	2.2243e-05	4.43046e-05	0.000186209	1.69961e-05	0.000421389	4.17615e-05	3.92917e-05	2.80382e-05	5.70983e-05	0.000115572	0.000331426	0.000254315	4.02755e-05	0.00022118	3.19377e-05	0.000146926	0.000407247	0.0022719	0.00740815	1.43668e-05	0.000103154	3.92453e-05	0	0.000320948	0.0005378	0.000241886	0	0.000126233	0	8.45942e-05	0.000431109	0.000520439	0.000785897
Shewanella	9.84562e-06	0	3.33645e-05	5.53808e-05	0.000256037	0	0.000206211	0	5.23889e-05	3.73842e-05	9.51638e-06	0.000452659	0.000174435	2.1193e-05	1.00689e-05	4.57614e-05	0	0.000104947	0.000274655	0.000121399	0.000162131	0	0	0	0.000152224	0.000134591	0	0.0101042	1.3028e-05	0	0	0.000120849	0.0008499	0	1.355e-05
Thiobacillus	4.92281e-05	0.00018912	0.000266916	0.000132914	0.000430608	0	0.00018828	0.000261009	0.000196459	0.000102807	0.000237909	0.000269669	0.000453531	0.000413263	0.000241653	0.000289822	0.000149042	0.000167916	0.000227301	0.000320841	0.000124716	0.000201135	0.00023444	0.000264906	9.68697e-05	0.000217416	0.000259296	0.000142933	0.000208447	0.000180333	2.58075e-05	0.000531735	0.000172444	0.000141938	0.0001084
Acidovorax	0.000334751	1.71928e-05	5.56075e-05	3.32285e-05	0	0	8.96572e-06	2.08808e-05	0.000196459	0.000121499	9.51638e-05	3.85241e-05	5.23304e-05	1.05965e-05	0.000845785	0.000396598	0.000883609	5.24736e-05	1.89417e-05	0.000112728	6.23581e-05	0.00107751	9.37761e-05	9.81133e-06	5.53541e-05	2.07063e-05	0	0.000120943	0.000547174	0.000126233	0.000180652	7.25093e-05	9.85392e-05	1.57709e-05	2.70999e-05
Leptothrix	0	0	5.56075e-05	1.10762e-05	0.000232761	0	5.37943e-05	1.04404e-05	7.85834e-05	3.73842e-05	6.66146e-05	4.81552e-05	6.97739e-05	4.23859e-05	1.00689e-05	7.62689e-06	4.25835e-05	6.29683e-05	5.68252e-05	9.53851e-05	0.000187074	0	3.75104e-05	0	2.76771e-05	0.000310594	5.76214e-05	0.000186912	2.60559e-05	5.40999e-05	1.29037e-05	7.25093e-05	0.000394157	0.00255488	0.000718147
Cupriavidus	5.90737e-05	6.87711e-05	0.000122336	4.43046e-05	0.000267675	0.000118973	0.000107589	0.000198367	0.000222653	6.54224e-05	7.6131e-05	0.00018299	0.000156991	0.000190737	0.000100689	0.000648286	0.000223564	0.000157421	0.000255713	0.000277484	0.000112245	7.18339e-05	9.37761e-05	0.000137359	8.30312e-05	0.000269182	0.000172864	0.000109948	6.51398e-05	0.000126233	5.16149e-05	0.000145019	0.000295617	0.000110396	8.12997e-05
Massilia	8.86106e-05	0	0	2.21523e-05	0.000139657	0.00181009	0	5.22019e-05	0.000117875	1.86921e-05	4.75819e-05	9.63104e-06	0	1.05965e-05	2.01377e-05	5.33882e-05	1.06459e-05	2.09894e-05	1.89417e-05	8.67137e-06	0	7.18339e-05	1.87552e-05	9.81133e-06	1.38385e-05	1.03531e-05	3.84143e-05	1.09948e-05	0.000104224	3.60666e-05	0.000890357	0.000410886	6.1587e-05	1.57709e-05	5.41998e-05
Azospirillum	9.84562e-06	1.71928e-05	1.11215e-05	0	1.16381e-05	0	0	0	1.30972e-05	0.000205613	2.85491e-05	0.000144466	1.74435e-05	0	9.06198e-05	0	2.12918e-05	0	9.47086e-06	3.46855e-05	1.24716e-05	0	0	0	1.38385e-05	5.17657e-05	3.84143e-05	0	6.51398e-05	7.21332e-05	5.16149e-05	0.00152269	3.69522e-05	0.000583523	2.70999e-05
Rhodobacter	2.95369e-05	1.71928e-05	1.11215e-05	2.21523e-05	8.14664e-05	3.39922e-05	0.00018828	1.04404e-05	7.85834e-05	4.67303e-05	7.6131e-05	7.70483e-05	6.97739e-05	0.000116561	3.02066e-05	3.81345e-05	1.06459e-05	6.29683e-05	0.000104179	0.000130071	0.000199546	2.87336e-05	2.81328e-05	9.81133e-06	8.30312e-05	0.000134591	7.68285e-05	4.39792e-05	5.21118e-05	3.60666e-05	0	2.41698e-05	0.000160126	0.000646606	0.000257449
Azospira	1.96912e-05	8.59638e-05	4.4486e-05	4.43046e-05	0.000104743	0	1.79314e-05	4.17615e-05	2.61945e-05	0	1.90328e-05	4.81552e-05	0.000104661	0	3.02066e-05	0.000114403	3.19377e-05	3.14842e-05	3.78835e-05	1.73427e-05	1.24716e-05	2.87336e-05	3.75104e-05	2.9434e-05	1.38385e-05	2.07063e-05	9.60356e-06	1.09948e-05	0	1.80333e-05	0	6.04244e-05	2.46348e-05	0	2.70999e-05
Magnetospirillum	0	0	5.56075e-05	0	1.16381e-05	0	8.96572e-06	0	9.16806e-05	6.54224e-05	2.85491e-05	9.63104e-05	0	2.1193e-05	0	2.28807e-05	0	0	2.84126e-05	2.60141e-05	3.74149e-05	0	9.37761e-06	9.81133e-06	0	1.03531e-05	0	0	0	0	0	1.20849e-05	3.69522e-05	0	4.06499e-05
Rhizobium	0	1.71928e-05	2.2243e-05	0	1.16381e-05	5.09883e-05	8.96572e-06	4.17615e-05	0	0	0	2.88931e-05	0	2.1193e-05	2.01377e-05	1.52538e-05	1.06459e-05	1.04947e-05	1.89417e-05	0	1.24716e-05	0	0	1.96227e-05	2.76771e-05	1.03531e-05	0	0	1.3028e-05	0	0	3.62547e-05	1.23174e-05	0	1.355e-05
Pseudogulbenkiania	0	0	1.11215e-05	1.10762e-05	0	0	0	7.30826e-05	1.30972e-05	9.34606e-06	0	0	0	1.05965e-05	2.01377e-05	6.10151e-05	1.06459e-05	0	9.47086e-06	0	0	1.43668e-05	9.37761e-06	0	2.76771e-05	1.03531e-05	9.60356e-06	0	1.3028e-05	0	1.29037e-05	2.41698e-05	0	0	1.355e-05
Azoarcus	0	0	0	0	0	0	8.96572e-06	0	0	0	0	0	0	0	0	7.62689e-06	1.06459e-05	1.04947e-05	1.89417e-05	8.67137e-06	1.24716e-05	0	0	0	0	2.07063e-05	2.88107e-05	8.79585e-05	0	0	0	0	3.69522e-05	7.88544e-05	1.355e-05
Shinella	0	0	0	1.10762e-05	0	1.69961e-05	8.96572e-06	2.08808e-05	5.23889e-05	0	2.85491e-05	0	0	1.05965e-05	1.00689e-05	3.05076e-05	1.06459e-05	0	9.47086e-06	1.73427e-05	1.24716e-05	0	9.37761e-06	1.96227e-05	0	0	0	0	2.60559e-05	0	0	0	0	3.15418e-05	0
Agrobacterium	9.84562e-06	1.71928e-05	0	0	1.16381e-05	0	0	2.08808e-05	1.30972e-05	0	0	3.85241e-05	1.74435e-05	0	0	6.10151e-05	1.06459e-05	1.04947e-05	0	0	0	0	0	0	0	2.07063e-05	0	0	1.3028e-05	0	0	1.20849e-05	0	0	2.70999e-05
Chelatococcus	9.84562e-06	0	0	0	1.16381e-05	3.39922e-05	0	1.04404e-05	1.30972e-05	9.34606e-06	9.51638e-06	0	3.4887e-05	2.1193e-05	0	7.62689e-06	0	0	9.47086e-06	0	0	0	0	1.96227e-05	0	0	1.92071e-05	0	0	1.80333e-05	0	0	0	4.73126e-05	0
Sulfuricella	0	0	1.11215e-05	1.10762e-05	3.49142e-05	0	0	1.04404e-05	0	9.34606e-06	0	9.63104e-06	1.74435e-05	0	0	0	1.06459e-05	0	0	0	0	0	1.87552e-05	3.92453e-05	0	2.07063e-05	0	0	0	1.80333e-05	0	4.83395e-05	0	0	0
Noviherbaspirillum	0	1.71928e-05	1.11215e-05	1.10762e-05	1.16381e-05	0.000101977	0	0	0	0	9.51638e-06	0	0	1.05965e-05	1.00689e-05	1.52538e-05	0	0	9.47086e-06	0	0	0	0	0	0	0	0	0	0	0	0	2.41698e-05	2.46348e-05	0	0
Marinobacter	0	0	0	0	0	0	0	0	0	0	0	0	0	0	0	0	0	0	0	0	0	0	9.37761e-05	0	0	0	0	0	0	1.80333e-05	0	0	0	0	0
Aminobacter	0	1.71928e-05	0	0	0	0	0	2.08808e-05	0	0	0	9.63104e-06	0	0	0	0	0	0	0	0	0	0	0	0	0	0	0	0	0	0	0	0	0	3.15418e-05	0
Paracoccus	0	0	0	0	1.16381e-05	0	0	0	0	0	0	0	0	0	0	7.62689e-06	0	0	0	0	0	0	0	0	1.38385e-05	0	0	0	0	0	0	0	0	1.57709e-05	1.355e-05
Brucella	0	0	0	0	0	0	0	0	0	0	0	9.63104e-06	0	0	0	7.62689e-06	0	1.04947e-05	0	0	0	0	0	0	0	0	0	0	0	0	0	0	0	0	0
Luteimonas	0	0	0	0	0	0	0	0	0	9.34606e-06	0	0	0	0	0	0	0	0	9.47086e-06	0	0	0	0	0	0	0	0	0	0	0	0	0	0	0	0
Sulfurimonas	0	0	0	0	0	0	0	0	0	0	0	0	0	0	0	0	0	0	0	0	0	0	0	0	0	1.03531e-05	0	0	0	0	0	0	0	0	0

## Sheet: M00530
	C0	C2	C5	C8	C11	C14	C17	MP0	MP2	MP5	MP8	MP11	MP14	MP17	EP0	EP2	EP5	EP8	EP11	EP14	EP17	PP0	PP2	PP5	PP8	PP11	PP14	PP17	BP0	BP2	BP5	BP8	BP11	BP14	BP17
Geobacter	0.000383979	0.00338697	0.00387028	0.00295734	0.00041897	0.000152965	0.00278834	0.00365413	0.00436138	0.00440199	0.00722293	0.01018	0.0130826	0.0147291	0.00505457	0.00906075	0.00385381	0.00389354	0.0108252	0.0101108	0.00990247	0.00139358	0.00500764	0.00614189	0.00285074	0.00863452	0.0139732	0.00818014	0.00287918	0.00440012	0.00259365	0.00924494	0.00500086	0.00559866	0.00844162
Pseudomonas	0.00939371	0.00753043	0.00344766	0.00459882	0.000174571	0.00606081	0.000618634	0.00215072	0.000929904	0.0121686	0.0038351	0.0015506	0.000156991	3.18e-05	0.0105622	0.000854212	0.0103797	0.00132234	0.00261396	0.00118798	8.73e-05	0.00546656	0.00301959	0.00151095	0.00454873	0.000207063	0.00083551	0.00358431	0.00222908	0.00187546	0.00608411	0.0145744	0.000197078	0.000346959	0.00588068
Sphaerotilus	0.000118147	0.000137542	0.000133458	0.000221523	0.000721559	3.39922e-05	0.00114761	5.22019e-05	0.00155857	0.000579455	0.00195086	0.00748331	0.00387245	0.00122919	0.000140964	0.000709301	0.00170334	0.00435531	0.0109294	0.00426631	0.00445237	1.43668e-05	0.000647055	0.000421887	0.00192356	0.00355113	0.000528196	0.00814715	6.51398e-05	0.000847565	0.000141941	0.00238072	0.0148671	0.00979372	0.0103793
Anaeromyxobacter	0.00031506	0.000429819	0.00141243	0.000465199	0.00027233	1.69961e-05	0.0012821	0.000699505	0.00116565	0.000598148	0.00181763	0.00509482	0.00495395	0.00522406	0.00035241	0.00160927	0.00105394	0.00130134	0.00678114	0.0068157	0.00409069	0.000373536	0.00131287	0.00109887	0.000484349	0.0135937	0.00486901	0.00260577	0.00050809	0.000955764	0.000400015	0.000954706	0.00953366	0.0024918	0.00333329
Hydrogenophaga	0.000177221	0.000206313	0.000389252	0.00014399	0.000302589	3.39922e-05	0.00127313	0.000114844	0.00352316	0.00113087	0.00172246	0.00340939	0.00448298	0.00163186	0.000120826	0.00141098	0.000521648	0.00110195	0.00243401	0.00510744	0.00760769	0.000129301	0.0020537	0.00127547	0.000650411	0.00653283	0.00274662	0.00204504	0.000182391	0.00308369	0.00144522	0.00209069	0.00495159	0.00271259	0.00310294
Dechloromonas	0.000255986	0.000206313	0.000767383	0.000420894	0.000814664	6.79844e-05	0.000430354	0.000970955	0.00193839	0.000429919	0.000637597	0.0015506	0.00305261	0.00111263	0.000694752	0.009587	0.000489711	0.000682157	0.000975499	0.00164756	0.00430271	0.000229869	0.00110656	0.000510189	0.000318286	0.00348901	0.00521474	0.00225394	0.000390839	0.000775431	0.000400015	0.00211486	0.00284532	0.00402158	0.00401079
Hyphomicrobium	0.000433207	0.000945602	0.000367009	0.000465199	0.00112889	0.00188657	0.00242074	0.00084567	0.00201697	0.000803761	0.0017986	0.00162765	0.00226765	0.00226765	0.000563857	0.00136521	0.00077715	0.00103898	0.00236772	0.00270547	0.00265646	0.000632138	0.00136913	0.00130491	0.00047051	0.00264005	0.00195913	0.00183613	0.00070351	0.000973798	0.000645186	0.000592159	0.00282068	0.00506245	0.00367204
Janthinobacterium	0.000541509	0.000326663	0.000266916	0.001163	0	0.00138518	0	0.000104404	1.30972e-05	0.00826191	0.00186521	9.63104e-06	0	0	0.000513512	7.62689e-06	0.00540811	0	9.47086e-06	8.67137e-06	0	0.00110624	0	0	0.000110708	0	0	0	7.81677e-05	1.80333e-05	0.0161813	0.00560739	0	0	0.00203249
Ralstonia	0.000187067	0.000206313	0.000144579	0.000155066	0.00429444	0.000237946	0.000699326	0.000386294	0.000275042	0.000102807	0.000333073	0.00153133	0.00034887	0.000349684	0.000201377	0.000167792	0.000159688	0.000388305	0.00170476	0.000546296	0.000174603	0.000531571	0.000309461	0.000245283	0.00261548	0.00297135	0.000508989	0.000879585	0.000377811	9.01664e-05	6.45186e-05	0.00348045	0.00406474	0.000268105	0.000867197
Bradyrhizobium	0.000255986	0.000584554	0.000322523	0.000343361	0.000814664	0.000900794	0.000986229	0.000793469	0.00104778	0.000364496	0.000837441	0.00162765	0.00158736	0.00137754	0.000573926	0.00104488	0.000745212	0.000430284	0.00124068	0.00121399	0.000972787	0.000215502	0.000890873	0.000716227	0.000221417	0.000942136	0.000960356	0.000912569	0.000390839	0.000414766	0.000322593	0.000362547	0.000739044	0.000835857	0.0010298
Rhodococcus	0.00323921	1.71928e-05	2.2243e-05	3.32285e-05	0	0	8.96572e-06	0.000689065	1.30972e-05	0.000299074	9.51638e-06	0.000539338	0	1.05965e-05	0.00334286	1.52538e-05	0.000234209	1.04947e-05	0	0	0	0.00721213	0.000403237	6.86793e-05	1.38385e-05	0	0	0	0.00256651	0.00225416	0.000438727	0	1.23174e-05	0	0
Undibacterium	0.00141777	0.00030947	0.000378131	0.000653493	3.49142e-05	0	8.96572e-06	0.000240129	0.000406014	0.00149537	0.000989703	0.000317824	1.74435e-05	1.05965e-05	0.00102702	0.000373718	0.000532294	0.00095502	4.73543e-05	0.00038154	0.000374149	0.00443934	0.000693943	0.000264906	6.91927e-05	1.03531e-05	0.000182468	0.000252881	0.000964069	0.000198366	0.00020646	0.00276744	0	9.46253e-05	0.000149049
Brevundimonas	0	5.15783e-05	4.4486e-05	1.10762e-05	0.000232761	0.000584666	0.00165866	9.39634e-05	0.000288139	0.000420573	0.000837441	0.000356348	0.000191878	4.23859e-05	0.000191309	0.000144911	0.000564232	0.00188905	0.000369364	0.000294827	0.000648525	2.87336e-05	0.000243818	0.000559246	0.00123163	0.000973196	9.60356e-05	0.000428798	0.000117252	0.000234433	0.000606475	0.0011964	0.000837583	0.000835857	0.00186989
Aromatoleum	5.90737e-05	0.000103157	0.000344766	0.000199371	0.00224615	0	0.00103106	0.000219248	0.000497695	0.000177575	0.000180811	0.000587493	0.000523304	0.000307298	0.000211446	0.00177707	0.000191626	0.000251873	0.00115544	0.000754409	0.000685939	0.000172401	0.000572034	0.000176604	8.30312e-05	0.00124238	0.0005378	0.000109948	0.00013028	0.000504932	0.000141941	0.000326292	0.00110857	0.000441585	0.000352299
Aquabacterium	0.000147684	6.87711e-05	0.000333645	8.86093e-05	0.000453884	1.69961e-05	0.0003138	0.000344532	0.000982293	0.000177575	0.000390171	0.000731959	0.00130826	0.000603999	0.000110758	0.000327956	0.000202272	0.000367315	0.000634548	0.00111861	0.00108503	0.000215502	0.000572034	0.000323774	0.000152224	0.000807545	0.000364935	0.000252881	0.000182391	0.000703298	0.000167748	0.000422971	0.00101003	0.000441585	0.000623298
Thauera	0	0	2.2243e-05	4.43046e-05	0.000186209	1.69961e-05	0.000421389	4.17615e-05	3.92917e-05	2.80382e-05	5.70983e-05	0.000115572	0.000331426	0.000254315	4.02755e-05	0.00022118	3.19377e-05	0.000146926	0.000407247	0.0022719	0.00740815	1.43668e-05	0.000103154	3.92453e-05	0	0.000320948	0.0005378	0.000241886	0	0.000126233	0	8.45942e-05	0.000431109	0.000520439	0.000785897
Shewanella	9.84562e-06	0	3.33645e-05	5.53808e-05	0.000256037	0	0.000206211	0	5.23889e-05	3.73842e-05	9.51638e-06	0.000452659	0.000174435	2.1193e-05	1.00689e-05	4.57614e-05	0	0.000104947	0.000274655	0.000121399	0.000162131	0	0	0	0.000152224	0.000134591	0	0.0101042	1.3028e-05	0	0	0.000120849	0.0008499	0	1.355e-05
Sulfuritalea	3.93825e-05	0.000275084	0.000433738	0.000166142	0.000570265	1.69961e-05	0.000233109	0.000344532	0.000497695	7.47685e-05	0.000409204	0.00046229	0.00075007	0.000339087	0.000100689	0.000419479	0.000223564	0.000283357	0.000322009	0.000303498	0.000311791	5.74671e-05	0.000253195	0.000274717	5.53541e-05	0.000476245	0.000441764	0.000263875	6.51398e-05	0.000360666	0.000116134	0.000954706	0.000591235	0.000252334	0.000853647
Meiothermus	0.000187067	0.000378241	0.000189065	0.000243676	0.000488798	0.000356918	0.000591737	0.000344532	0.000550084	0.000158883	0.000218877	0.000250407	0.000418644	0.000455648	0.000161102	0.00056439	0.000127751	0.000188905	0.000492485	0.000398883	0.000411564	0.000172401	0.000159419	0.000225661	5.53541e-05	0.000331301	0.00040335	0.000307855	0.000117252	9.01664e-05	7.74224e-05	0.000302122	0.0002833	0.000141938	0.000460698
Rhodoferax	0.000187067	1.71928e-05	0.000244673	3.32285e-05	6.98283e-05	1.69961e-05	0.000286903	0.00131549	0.000536987	0.000158883	0.000142746	6.74172e-05	3.4887e-05	2.1193e-05	0.000604132	0.000198299	0.000244855	0.000209894	3.78835e-05	4.33569e-05	7.48298e-05	0.00139358	0.000346972	0.000313963	8.30312e-05	5.17657e-05	3.84143e-05	6.59689e-05	0.000951041	0.000703298	2.58075e-05	0.000422971	0	0	0.0001084
Comamonas	7.8765e-05	5.15783e-05	3.33645e-05	2.21523e-05	2.32761e-05	1.69961e-05	1.79314e-05	0.000135725	0.000969195	0.000224305	0.000704212	0.000452659	0.000470974	0.000116561	0.000100689	0.00428631	0.000212918	0.000241379	0.000123121	0.000182099	3.74149e-05	1.43668e-05	9.37761e-06	9.81133e-06	1.38385e-05	0	0	1.09948e-05	2.60559e-05	3.60666e-05	1.29037e-05	3.62547e-05	2.46348e-05	1.57709e-05	2.70999e-05
Aeromonas	9.84562e-06	3.43855e-05	1.11215e-05	3.32285e-05	4.65522e-05	0	0.000179314	1.04404e-05	0	4.67303e-05	0.00010468	5.77862e-05	3.4887e-05	2.1193e-05	3.02066e-05	3.81345e-05	5.32294e-05	6.29683e-05	9.47086e-06	0.000424897	9.9773e-05	2.87336e-05	9.37761e-06	1.96227e-05	0.000332125	0.000113885	2.88107e-05	0.0052995	0	0.0001082	7.74224e-05	0.000108764	0.000788313	4.73126e-05	0.0001355
Devosia	0.000196912	0.000343855	0.000155701	8.86093e-05	0.000302589	0.000220949	8.96572e-05	0.000302771	0.000419111	6.54224e-05	0.000237909	0.000346717	0.000261652	0.000158947	0.00035241	0.000381345	0.000276793	0.000136431	0.000170476	0.00019077	0.000162131	0.000287336	0.000215685	0.000618114	6.91927e-05	0.00016565	0.000153657	9.89533e-05	0.000534146	0.000126233	0.000116134	0.000217528	0.000295617	0.000331188	0.0001355
Methyloversatilis	6.89193e-05	0.000154735	0.000189065	5.53808e-05	0.000488798	0	0.000304834	0	0.000366723	4.67303e-05	8.56474e-05	0.000317824	0.000244209	0.000127158	0	7.62689e-05	1.06459e-05	6.29683e-05	0.000151534	0.000225456	0.00053628	0	0.000450125	0.000176604	0.000110708	0.000817899	0.000230486	0.000208901	1.3028e-05	0.000252466	0.000116134	0.000181273	0.000837583	0.000394272	0.000311649
Thiobacillus	4.92281e-05	0.00018912	0.000266916	0.000132914	0.000430608	0	0.00018828	0.000261009	0.000196459	0.000102807	0.000237909	0.000269669	0.000453531	0.000413263	0.000241653	0.000289822	0.000149042	0.000167916	0.000227301	0.000320841	0.000124716	0.000201135	0.00023444	0.000264906	9.68697e-05	0.000217416	0.000259296	0.000142933	0.000208447	0.000180333	2.58075e-05	0.000531735	0.000172444	0.000141938	0.0001084
Pseudarthrobacter	8.86106e-05	1.71928e-05	1.11215e-05	1.10762e-05	1.16381e-05	0.0052348	0	1.04404e-05	0	4.67303e-05	0.000133229	3.85241e-05	0	1.05965e-05	0.000110758	7.62689e-06	3.19377e-05	1.04947e-05	8.52378e-05	8.67137e-06	0	8.62007e-05	5.62656e-05	2.9434e-05	2.76771e-05	1.03531e-05	5.76214e-05	4.39792e-05	0.000286615	0.000126233	3.87112e-05	0	0	1.57709e-05	2.70999e-05
Nocardioides	0.000118147	0.000103157	0.000122336	6.6457e-05	0.000314228	0.000322926	0.000107589	0.000114844	0.000170264	8.41145e-05	9.51638e-05	0.000221514	0.000156991	0.000243719	7.04821e-05	0.00022118	0.000149042	7.3463e-05	0.000416718	0.000208113	0.000137188	0.000143668	0.000328216	0.000117736	9.68697e-05	0.000569423	0.000211278	0.000120943	7.81677e-05	0.000270499	0.000116134	8.45942e-05	0.000628187	0.000141938	0.000216799
Phenylobacterium	0.000147684	0.000137542	0.000177944	6.6457e-05	0.000209485	0.000186957	0.000116554	0.000261009	0.000458403	0.000102807	0.000171295	0.000221514	6.97739e-05	0	0.000201377	0.000350837	0.000159688	7.3463e-05	0.00011365	0.000104056	1.24716e-05	0.000272969	0.000215685	0.000559246	0.000152224	0.000144944	0.000163261	6.59689e-05	0.000143308	0.0001623	9.03261e-05	0.000120849	0.000258665	0.000220792	5.41998e-05
Acidovorax	0.000334751	1.71928e-05	5.56075e-05	3.32285e-05	0	0	8.96572e-06	2.08808e-05	0.000196459	0.000121499	9.51638e-05	3.85241e-05	5.23304e-05	1.05965e-05	0.000845785	0.000396598	0.000883609	5.24736e-05	1.89417e-05	0.000112728	6.23581e-05	0.00107751	9.37761e-05	9.81133e-06	5.53541e-05	2.07063e-05	0	0.000120943	0.000547174	0.000126233	0.000180652	7.25093e-05	9.85392e-05	1.57709e-05	2.70999e-05
Deefgea	2.95369e-05	0	1.11215e-05	2.21523e-05	0	0	0	1.04404e-05	2.61945e-05	9.34606e-06	0.000171295	0.000221514	0	0	1.00689e-05	4.57614e-05	0.000127751	0.00335831	0	0	0	0	0.000131287	0	1.38385e-05	5.17657e-05	0	0	1.3028e-05	1.80333e-05	1.29037e-05	0.000108764	0.00124406	0	0
Leptothrix	0	0	5.56075e-05	1.10762e-05	0.000232761	0	5.37943e-05	1.04404e-05	7.85834e-05	3.73842e-05	6.66146e-05	4.81552e-05	6.97739e-05	4.23859e-05	1.00689e-05	7.62689e-06	4.25835e-05	6.29683e-05	5.68252e-05	9.53851e-05	0.000187074	0	3.75104e-05	0	2.76771e-05	0.000310594	5.76214e-05	0.000186912	2.60559e-05	5.40999e-05	1.29037e-05	7.25093e-05	0.000394157	0.00255488	0.000718147
Cupriavidus	5.90737e-05	6.87711e-05	0.000122336	4.43046e-05	0.000267675	0.000118973	0.000107589	0.000198367	0.000222653	6.54224e-05	7.6131e-05	0.00018299	0.000156991	0.000190737	0.000100689	0.000648286	0.000223564	0.000157421	0.000255713	0.000277484	0.000112245	7.18339e-05	9.37761e-05	0.000137359	8.30312e-05	0.000269182	0.000172864	0.000109948	6.51398e-05	0.000126233	5.16149e-05	0.000145019	0.000295617	0.000110396	8.12997e-05
Lysobacter	9.84562e-05	0.000154735	7.78504e-05	0.000110762	0.000174571	0.000237946	0.000170349	0.000261009	0.00037982	2.80382e-05	0.000133229	0.000115572	0.000191878	0.000413263	0.000171171	0.000312703	9.5813e-05	8.39578e-05	0.000170476	7.80424e-05	4.98865e-05	0.000244235	0.000121909	0.000274717	4.15156e-05	0.000124238	0.000201675	4.39792e-05	0.000182391	7.21332e-05	5.16149e-05	0.000193358	0.000184761	3.15418e-05	9.48497e-05
Caulobacter	0.000108302	5.15783e-05	2.2243e-05	2.21523e-05	0.000116381	0.000577868	0.000134486	9.39634e-05	0.000340528	0.000130845	0.000275975	0.000250407	5.23304e-05	0	0.00027186	4.57614e-05	0.000127751	0	2.84126e-05	8.67137e-06	1.24716e-05	0.000488471	0.000159419	0.000274717	0.000124547	2.07063e-05	1.92071e-05	1.09948e-05	0.000299643	9.01664e-05	6.45186e-05	6.04244e-05	2.46348e-05	0.000520439	0
Massilia	8.86106e-05	0	0	2.21523e-05	0.000139657	0.00181009	0	5.22019e-05	0.000117875	1.86921e-05	4.75819e-05	9.63104e-06	0	1.05965e-05	2.01377e-05	5.33882e-05	1.06459e-05	2.09894e-05	1.89417e-05	8.67137e-06	0	7.18339e-05	1.87552e-05	9.81133e-06	1.38385e-05	1.03531e-05	3.84143e-05	1.09948e-05	0.000104224	3.60666e-05	0.000890357	0.000410886	6.1587e-05	1.57709e-05	5.41998e-05
Rhizobacter	6.89193e-05	5.15783e-05	8.89719e-05	2.21523e-05	0.000116381	0	9.86229e-05	0.000135725	0.000222653	3.73842e-05	2.85491e-05	6.74172e-05	5.23304e-05	4.23859e-05	0.000191309	0.000129657	7.45212e-05	0.000104947	4.73543e-05	9.53851e-05	6.23581e-05	0.000215502	7.50209e-05	6.86793e-05	5.53541e-05	8.28252e-05	6.7225e-05	3.29844e-05	0.000260559	0.000234433	1.29037e-05	7.25093e-05	4.92696e-05	0.000315418	5.41998e-05
Methylomonas	0	1.71928e-05	0	1.10762e-05	0	0	2.68971e-05	1.04404e-05	1.30972e-05	9.34606e-06	2.85491e-05	1.92621e-05	6.97739e-05	5.29824e-05	3.02066e-05	1.52538e-05	1.06459e-05	2.09894e-05	0.000255713	0.000702381	0.000773241	1.43668e-05	9.37761e-06	0	1.38385e-05	0.000124238	0.000153657	3.29844e-05	2.60559e-05	1.80333e-05	1.29037e-05	0	4.92696e-05	0.000488897	0.000230349
Mycobacterium	7.8765e-05	5.15783e-05	3.33645e-05	6.6457e-05	0.000139657	0.000118973	5.37943e-05	6.26423e-05	0.000130972	9.34606e-06	7.6131e-05	0.000115572	0.000156991	3.17894e-05	1.00689e-05	9.15227e-05	7.45212e-05	3.14842e-05	5.68252e-05	6.9371e-05	7.48298e-05	7.18339e-05	0.000281328	0.000107925	6.91927e-05	8.28252e-05	0.000144053	8.79585e-05	6.51398e-05	0.000324599	2.58075e-05	7.25093e-05	0.000209396	9.46253e-05	4.06499e-05
Azospirillum	9.84562e-06	1.71928e-05	1.11215e-05	0	1.16381e-05	0	0	0	1.30972e-05	0.000205613	2.85491e-05	0.000144466	1.74435e-05	0	9.06198e-05	0	2.12918e-05	0	9.47086e-06	3.46855e-05	1.24716e-05	0	0	0	1.38385e-05	5.17657e-05	3.84143e-05	0	6.51398e-05	7.21332e-05	5.16149e-05	0.00152269	3.69522e-05	0.000583523	2.70999e-05
Microvirga	3.93825e-05	0.000120349	1.11215e-05	2.21523e-05	0.000104743	0.000152965	3.58629e-05	1.04404e-05	5.23889e-05	3.73842e-05	9.51638e-06	0.00018299	0.000104661	6.35789e-05	4.02755e-05	9.91496e-05	5.32294e-05	4.19789e-05	6.6296e-05	2.60141e-05	8.73014e-05	2.87336e-05	0.000140664	6.86793e-05	0	4.14126e-05	9.60356e-05	2.19896e-05	1.3028e-05	7.21332e-05	2.58075e-05	2.41698e-05	0.000197078	0	0
Variovorax	4.92281e-05	5.15783e-05	5.56075e-05	3.32285e-05	6.98283e-05	8.49805e-05	3.58629e-05	0.000114844	1.30972e-05	4.67303e-05	4.75819e-05	4.81552e-05	1.74435e-05	1.05965e-05	0.000100689	0.00012203	0.000159688	3.14842e-05	9.47086e-05	4.33569e-05	4.98865e-05	0.000158035	4.6888e-05	0.000166793	2.76771e-05	2.07063e-05	9.60356e-06	0	0.00013028	5.40999e-05	2.58075e-05	0	3.69522e-05	3.15418e-05	1.355e-05
Cellvibrio	2.95369e-05	3.43855e-05	5.56075e-05	2.21523e-05	3.49142e-05	0	0.000555874	6.26423e-05	0.000275042	9.34606e-06	0	9.63104e-06	1.74435e-05	0	6.04132e-05	3.05076e-05	0	0	2.84126e-05	0	0	5.74671e-05	8.43985e-05	9.81133e-06	0	0	9.60356e-06	2.19896e-05	7.81677e-05	1.80333e-05	0	1.20849e-05	1.23174e-05	0	2.70999e-05
Pseudoxanthomonas	9.84562e-06	6.87711e-05	7.78504e-05	4.43046e-05	8.14664e-05	1.69961e-05	1.79314e-05	5.22019e-05	5.23889e-05	3.73842e-05	2.85491e-05	1.92621e-05	0	3.17894e-05	5.03444e-05	9.15227e-05	4.25835e-05	2.09894e-05	1.89417e-05	1.73427e-05	1.24716e-05	5.74671e-05	2.81328e-05	2.9434e-05	1.38385e-05	3.10594e-05	9.60356e-06	1.09948e-05	6.51398e-05	1.80333e-05	1.29037e-05	7.25093e-05	6.1587e-05	0.000205021	1.355e-05
Permianibacter	3.93825e-05	3.43855e-05	4.4486e-05	6.6457e-05	9.31045e-05	0	1.79314e-05	6.26423e-05	7.85834e-05	1.86921e-05	2.85491e-05	1.92621e-05	1.74435e-05	1.05965e-05	2.01377e-05	5.33882e-05	0	4.19789e-05	9.47086e-06	8.67137e-06	1.24716e-05	1.43668e-05	0.000215685	2.9434e-05	1.38385e-05	1.03531e-05	0	0	7.81677e-05	5.40999e-05	1.29037e-05	6.04244e-05	2.46348e-05	0	0
Azospira	1.96912e-05	8.59638e-05	4.4486e-05	4.43046e-05	0.000104743	0	1.79314e-05	4.17615e-05	2.61945e-05	0	1.90328e-05	4.81552e-05	0.000104661	0	3.02066e-05	0.000114403	3.19377e-05	3.14842e-05	3.78835e-05	1.73427e-05	1.24716e-05	2.87336e-05	3.75104e-05	2.9434e-05	1.38385e-05	2.07063e-05	9.60356e-06	1.09948e-05	0	1.80333e-05	0	6.04244e-05	2.46348e-05	0	2.70999e-05
Pseudonocardia	0	1.71928e-05	0	2.21523e-05	2.32761e-05	1.69961e-05	2.68971e-05	0	2.61945e-05	9.34606e-06	1.90328e-05	2.88931e-05	3.4887e-05	3.17894e-05	3.02066e-05	1.52538e-05	2.12918e-05	1.04947e-05	9.47086e-05	5.20282e-05	1.24716e-05	0	4.6888e-05	3.92453e-05	0	4.14126e-05	1.92071e-05	1.09948e-05	1.3028e-05	3.60666e-05	0	2.41698e-05	0.000258665	3.15418e-05	6.77498e-05
Staphylococcus	0	0	1.11215e-05	0	0.000151295	0	2.68971e-05	0	0	0	0	9.63104e-06	0	2.1193e-05	1.00689e-05	7.62689e-06	0	0	9.47086e-06	0	0	0.000244235	0.000121909	0	2.76771e-05	6.21189e-05	9.60356e-06	0	1.3028e-05	3.60666e-05	0	6.04244e-05	7.39044e-05	0	1.355e-05
Desulfovibrio	0	0	6.67289e-05	4.43046e-05	4.65522e-05	0	8.96572e-06	0	1.30972e-05	8.41145e-05	1.90328e-05	5.77862e-05	5.23304e-05	2.1193e-05	2.01377e-05	1.52538e-05	1.06459e-05	0	2.84126e-05	8.67137e-06	0	0	0	1.96227e-05	6.91927e-05	1.03531e-05	6.7225e-05	0	0	0	1.29037e-05	9.66791e-05	4.92696e-05	1.57709e-05	0
Paraburkholderia	0	0	1.11215e-05	0	5.81903e-05	5.09883e-05	8.96572e-06	5.22019e-05	5.23889e-05	9.34606e-06	1.90328e-05	1.92621e-05	5.23304e-05	3.17894e-05	6.04132e-05	6.8642e-05	4.25835e-05	2.09894e-05	9.47086e-06	1.73427e-05	1.24716e-05	2.87336e-05	0	9.81133e-06	0	3.10594e-05	0	0	2.60559e-05	0	1.29037e-05	1.20849e-05	9.85392e-05	1.57709e-05	0
Kribbella	1.96912e-05	1.71928e-05	2.2243e-05	2.21523e-05	3.49142e-05	1.69961e-05	1.79314e-05	4.17615e-05	2.61945e-05	0	0	9.63104e-06	0	2.1193e-05	1.00689e-05	3.81345e-05	5.32294e-05	1.04947e-05	5.68252e-05	0	2.49433e-05	1.43668e-05	8.43985e-05	2.9434e-05	0	1.03531e-05	6.7225e-05	0	1.3028e-05	3.60666e-05	1.29037e-05	1.20849e-05	6.1587e-05	1.57709e-05	2.70999e-05
Nakamurella	2.95369e-05	1.71928e-05	1.11215e-05	0	2.32761e-05	1.69961e-05	0	0	1.30972e-05	0	9.51638e-06	2.88931e-05	1.74435e-05	2.1193e-05	0	3.05076e-05	0	0	3.78835e-05	3.46855e-05	1.24716e-05	1.43668e-05	1.87552e-05	2.9434e-05	0	7.2472e-05	3.84143e-05	1.09948e-05	3.90839e-05	7.21332e-05	1.29037e-05	0	8.62218e-05	4.73126e-05	5.41998e-05
Corynebacterium	0	0	0	0	0.000162933	0	8.96572e-06	0	1.30972e-05	9.34606e-06	0	9.63104e-06	0	1.05965e-05	1.00689e-05	0	0	1.04947e-05	0	8.67137e-06	0	0.000158035	6.56433e-05	9.81133e-06	1.38385e-05	0	0	0	0.000104224	0	2.58075e-05	2.41698e-05	0	0	1.355e-05
Magnetospirillum	0	0	5.56075e-05	0	1.16381e-05	0	8.96572e-06	0	9.16806e-05	6.54224e-05	2.85491e-05	9.63104e-05	0	2.1193e-05	0	2.28807e-05	0	0	2.84126e-05	2.60141e-05	3.74149e-05	0	9.37761e-06	9.81133e-06	0	1.03531e-05	0	0	0	0	0	1.20849e-05	3.69522e-05	0	4.06499e-05
Caballeronia	9.84562e-06	1.71928e-05	2.2243e-05	0	3.49142e-05	0	1.79314e-05	2.08808e-05	2.61945e-05	2.80382e-05	9.51638e-06	1.92621e-05	0	1.05965e-05	1.00689e-05	9.91496e-05	2.12918e-05	4.19789e-05	9.47086e-06	8.67137e-06	0	0	9.37761e-06	0	1.38385e-05	2.07063e-05	1.92071e-05	0	2.60559e-05	1.80333e-05	1.29037e-05	1.20849e-05	3.69522e-05	1.57709e-05	0
Niveispirillum	0	1.71928e-05	1.11215e-05	0	0	0	0	0	1.30972e-05	0	0	0	0	0	0	7.62689e-06	2.12918e-05	0	9.47086e-06	0	1.24716e-05	0	2.81328e-05	0	0	3.10594e-05	9.60356e-06	1.09948e-05	0	1.80333e-05	0	0.000132934	0	0.000205021	5.41998e-05
Polaromonas	3.93825e-05	3.43855e-05	1.11215e-05	3.32285e-05	0	5.09883e-05	0	1.04404e-05	0	0	1.90328e-05	4.81552e-05	0	1.05965e-05	9.06198e-05	0	2.12918e-05	3.14842e-05	0	0	0	2.87336e-05	0	0	4.15156e-05	1.03531e-05	0	2.19896e-05	1.3028e-05	0	0	1.20849e-05	0	1.57709e-05	2.70999e-05
Paenibacillus	0	0	0	3.32285e-05	2.32761e-05	3.39922e-05	8.96572e-06	0	0	9.34606e-06	0	1.92621e-05	0	1.05965e-05	1.00689e-05	7.62689e-06	0	2.09894e-05	1.89417e-05	2.60141e-05	1.24716e-05	0	4.6888e-05	9.81133e-06	0	1.03531e-05	5.76214e-05	2.19896e-05	1.3028e-05	5.40999e-05	1.29037e-05	0	6.1587e-05	1.57709e-05	0
Bacillus	0	1.71928e-05	0	1.10762e-05	2.32761e-05	0	0	1.04404e-05	0	9.34606e-06	9.51638e-06	9.63104e-06	0	1.05965e-05	0	2.28807e-05	1.06459e-05	0	2.84126e-05	0	0	0	2.81328e-05	1.96227e-05	1.38385e-05	4.14126e-05	0	2.19896e-05	1.3028e-05	9.01664e-05	0	0	4.92696e-05	0	2.70999e-05
Rhizobium	0	1.71928e-05	2.2243e-05	0	1.16381e-05	5.09883e-05	8.96572e-06	4.17615e-05	0	0	0	2.88931e-05	0	2.1193e-05	2.01377e-05	1.52538e-05	1.06459e-05	1.04947e-05	1.89417e-05	0	1.24716e-05	0	0	1.96227e-05	2.76771e-05	1.03531e-05	0	0	1.3028e-05	0	0	3.62547e-05	1.23174e-05	0	1.355e-05
Pseudogulbenkiania	0	0	1.11215e-05	1.10762e-05	0	0	0	7.30826e-05	1.30972e-05	9.34606e-06	0	0	0	1.05965e-05	2.01377e-05	6.10151e-05	1.06459e-05	0	9.47086e-06	0	0	1.43668e-05	9.37761e-06	0	2.76771e-05	1.03531e-05	9.60356e-06	0	1.3028e-05	0	1.29037e-05	2.41698e-05	0	0	1.355e-05
Streptomyces	9.84562e-06	0	0	0	2.32761e-05	6.79844e-05	0	2.08808e-05	0	0	9.51638e-06	0	1.74435e-05	0	1.00689e-05	7.62689e-06	1.06459e-05	1.04947e-05	9.47086e-06	8.67137e-06	0	0	9.37761e-06	0	0	2.07063e-05	9.60356e-06	0	2.60559e-05	5.40999e-05	0	0	2.46348e-05	0	0
Azoarcus	0	0	0	0	0	0	8.96572e-06	0	0	0	0	0	0	0	0	7.62689e-06	1.06459e-05	1.04947e-05	1.89417e-05	8.67137e-06	1.24716e-05	0	0	0	0	2.07063e-05	2.88107e-05	8.79585e-05	0	0	0	0	3.69522e-05	7.88544e-05	1.355e-05
Dyella	0	1.71928e-05	1.11215e-05	1.10762e-05	0	0	8.96572e-06	2.08808e-05	2.61945e-05	0	1.90328e-05	2.88931e-05	0	1.05965e-05	5.03444e-05	1.52538e-05	1.06459e-05	0	9.47086e-06	0	0	1.43668e-05	9.37761e-06	9.81133e-06	0	0	0	0	1.3028e-05	1.80333e-05	0	2.41698e-05	0	0	0
Shinella	0	0	0	1.10762e-05	0	1.69961e-05	8.96572e-06	2.08808e-05	5.23889e-05	0	2.85491e-05	0	0	1.05965e-05	1.00689e-05	3.05076e-05	1.06459e-05	0	9.47086e-06	1.73427e-05	1.24716e-05	0	9.37761e-06	1.96227e-05	0	0	0	0	2.60559e-05	0	0	0	0	3.15418e-05	0
Paucibacter	2.95369e-05	0	2.2243e-05	0	0	1.69961e-05	0	3.13211e-05	3.92917e-05	2.80382e-05	4.75819e-05	1.92621e-05	0	0	1.00689e-05	0	1.06459e-05	0	0	0	0	1.43668e-05	0	0	0	0	0	0	0	0	0	2.41698e-05	0	0	0
Agrobacterium	9.84562e-06	1.71928e-05	0	0	1.16381e-05	0	0	2.08808e-05	1.30972e-05	0	0	3.85241e-05	1.74435e-05	0	0	6.10151e-05	1.06459e-05	1.04947e-05	0	0	0	0	0	0	0	2.07063e-05	0	0	1.3028e-05	0	0	1.20849e-05	0	0	2.70999e-05
Methylibium	0	0	1.11215e-05	1.10762e-05	0	0	2.68971e-05	0	1.30972e-05	0	0	0	0	0	0	0	0	0	0	0	0	0	0	0	0	5.17657e-05	1.92071e-05	0	0	0	0	0	4.92696e-05	3.15418e-05	6.77498e-05
Hyphomonas	0	0	3.33645e-05	0	0	0	8.96572e-06	0	2.61945e-05	1.86921e-05	0	9.63104e-06	0	1.05965e-05	2.01377e-05	1.52538e-05	0	0	0	1.73427e-05	0	1.43668e-05	9.37761e-06	2.9434e-05	0	1.03531e-05	0	0	1.3028e-05	1.80333e-05	1.29037e-05	0	0	0	1.355e-05
Chelatococcus	9.84562e-06	0	0	0	1.16381e-05	3.39922e-05	0	1.04404e-05	1.30972e-05	9.34606e-06	9.51638e-06	0	3.4887e-05	2.1193e-05	0	7.62689e-06	0	0	9.47086e-06	0	0	0	0	1.96227e-05	0	0	1.92071e-05	0	0	1.80333e-05	0	0	0	4.73126e-05	0
Achromobacter	0	0	0	0	0	0	8.96572e-06	0	0	0	0	2.88931e-05	0	2.1193e-05	0	1.52538e-05	3.19377e-05	0	9.47086e-06	0	0	0	1.87552e-05	0	1.38385e-05	1.03531e-05	2.88107e-05	0	0	1.80333e-05	0	2.41698e-05	2.46348e-05	1.57709e-05	0
Sulfuricella	0	0	1.11215e-05	1.10762e-05	3.49142e-05	0	0	1.04404e-05	0	9.34606e-06	0	9.63104e-06	1.74435e-05	0	0	0	1.06459e-05	0	0	0	0	0	1.87552e-05	3.92453e-05	0	2.07063e-05	0	0	0	1.80333e-05	0	4.83395e-05	0	0	0
Noviherbaspirillum	0	1.71928e-05	1.11215e-05	1.10762e-05	1.16381e-05	0.000101977	0	0	0	0	9.51638e-06	0	0	1.05965e-05	1.00689e-05	1.52538e-05	0	0	9.47086e-06	0	0	0	0	0	0	0	0	0	0	0	0	2.41698e-05	2.46348e-05	0	0
Burkholderia	0	0	0	0	4.65522e-05	0	8.96572e-06	2.08808e-05	2.61945e-05	0	0	9.63104e-06	0	0	1.00689e-05	0	0	1.04947e-05	0	0	0	0	9.37761e-06	9.81133e-06	0	0	0	0	1.3028e-05	1.80333e-05	0	1.20849e-05	0	0	0
Intrasporangium	0	0	0	0	0	1.69961e-05	8.96572e-06	0	0	0	0	0	1.74435e-05	2.1193e-05	0	7.62689e-06	0	0	9.47086e-06	8.67137e-06	0	1.43668e-05	9.37761e-06	0	0	2.07063e-05	1.92071e-05	2.19896e-05	0	0	0	0	0	1.57709e-05	0
Cellulomonas	9.84562e-06	0	0	0	1.16381e-05	0	8.96572e-06	0	1.30972e-05	0	0	1.92621e-05	0	0	0	0	0	1.04947e-05	0	0	0	0	0	1.96227e-05	0	0	9.60356e-06	0	0	1.80333e-05	1.29037e-05	2.41698e-05	1.23174e-05	1.57709e-05	0
Herminiimonas	0	0	0	0	0	0	0	0	0	0	0	0	0	0	0.000120826	0	0	0	0	0	0	0	0	0	1.38385e-05	0	0	0	0	0	0	0	0	0	0
Sorangium	9.84562e-06	1.71928e-05	0	1.10762e-05	0	0	8.96572e-06	0	1.30972e-05	0	0	9.63104e-06	0	1.05965e-05	0	0	1.06459e-05	0	9.47086e-06	0	0	0	0	0	0	0	9.60356e-06	0	0	1.80333e-05	0	0	0	0	0
Marinobacter	0	0	0	0	0	0	0	0	0	0	0	0	0	0	0	0	0	0	0	0	0	0	9.37761e-05	0	0	0	0	0	0	1.80333e-05	0	0	0	0	0
Acidiphilium	0	0	0	0	0	0	0	1.04404e-05	0	1.86921e-05	1.90328e-05	9.63104e-06	1.74435e-05	2.1193e-05	0	0	0	0	0	0	0	0	0	0	0	0	0	0	0	0	0	0	0	0	0
Nocardia	0	0	0	0	1.16381e-05	0	0	0	1.30972e-05	0	0	0	0	0	1.00689e-05	1.52538e-05	0	0	0	0	0	0	2.81328e-05	0	0	0	9.60356e-06	0	0	0	0	0	0	0	0
Aminobacter	0	1.71928e-05	0	0	0	0	0	2.08808e-05	0	0	0	9.63104e-06	0	0	0	0	0	0	0	0	0	0	0	0	0	0	0	0	0	0	0	0	0	3.15418e-05	0
Gordonia	0	0	0	0	0	0	8.96572e-06	0	0	0	0	9.63104e-06	0	0	0	0	0	0	0	8.67137e-06	0	0	9.37761e-06	0	1.38385e-05	0	0	1.09948e-05	0	0	1.29037e-05	0	0	0	0
Paracoccus	0	0	0	0	1.16381e-05	0	0	0	0	0	0	0	0	0	0	7.62689e-06	0	0	0	0	0	0	0	0	1.38385e-05	0	0	0	0	0	0	0	0	1.57709e-05	1.355e-05
Rothia	0	0	0	0	2.32761e-05	0	0	0	1.30972e-05	0	0	0	0	0	0	0	0	1.04947e-05	0	0	0	0	0	0	0	0	0	0	0	0	0	0	1.23174e-05	0	0
Rubrobacter	0	0	0	0	1.16381e-05	0	0	0	0	0	0	0	0	0	0	0	0	0	9.47086e-06	0	0	0	0	0	0	0	0	0	0	0	1.29037e-05	1.20849e-05	1.23174e-05	0	0
Actinoplanes	0	0	0	0	0	0	0	0	0	0	0	0	0	1.05965e-05	0	0	0	0	0	0	0	0	0	0	0	0	0	0	0	0	0	0	0	4.73126e-05	0
Vitreoscilla	0	0	0	0	1.16381e-05	0	0	0	0	0	0	0	0	0	0	0	0	0	0	0	0	0	0	0	0	2.07063e-05	0	0	0	0	0	0	0	1.57709e-05	0
Thermus	0	0	0	0	0	0	0	0	0	0	0	0	0	0	0	0	0	1.04947e-05	1.89417e-05	0	0	0	0	0	0	0	0	0	0	1.80333e-05	0	0	0	0	0
Alcanivorax	0	0	0	1.10762e-05	1.16381e-05	0	8.96572e-06	0	1.30972e-05	0	0	0	0	0	0	0	0	0	0	0	0	0	0	0	0	0	0	0	0	0	0	0	0	0	0
Sulfurospirillum	0	0	0	0	0	0	0	0	0	0	0	1.92621e-05	0	0	0	0	0	0	0	0	0	0	0	0	0	0	0	0	0	1.80333e-05	0	0	0	0	0
Archangium	0	0	0	0	0	0	0	0	0	0	0	9.63104e-06	1.74435e-05	0	0	0	0	0	0	0	0	0	9.37761e-06	0	0	0	0	0	0	0	0	0	0	0	0
Amycolatopsis	0	0	0	0	0	0	0	0	0	0	0	0	0	0	0	0	0	0	0	0	0	0	0	0	0	1.03531e-05	0	0	1.3028e-05	0	0	0	1.23174e-05	0	0
Geobacillus	0	0	0	0	0	0	0	0	0	0	0	0	0	1.05965e-05	0	0	0	0	0	0	0	0	0	0	0	1.03531e-05	0	0	0	0	0	0	1.23174e-05	0	0
Actinomyces	0	0	0	0	1.16381e-05	0	0	0	0	0	0	9.63104e-06	0	0	0	0	0	1.04947e-05	0	0	0	0	0	0	0	0	0	0	0	0	0	0	0	0	0
Streptosporangium	0	0	0	0	0	0	0	0	1.30972e-05	0	0	0	0	0	0	7.62689e-06	0	0	0	0	0	0	0	0	0	0	9.60356e-06	0	0	0	0	0	0	0	0
Delftia	9.84562e-06	0	0	0	0	0	0	0	0	0	0	0	0	0	0	7.62689e-06	0	0	0	0	0	0	0	0	0	0	0	0	0	0	0	1.20849e-05	0	0	0
Kibdelosporangium	0	0	0	0	0	1.69961e-05	0	0	0	0	0	0	0	0	0	0	1.06459e-05	0	0	0	0	0	0	0	0	0	0	0	0	0	0	0	0	0	0
Actinosynnema	0	0	0	0	0	0	0	0	0	9.34606e-06	0	0	0	0	0	0	0	0	0	0	0	1.43668e-05	0	0	0	0	0	0	0	0	0	0	0	0	0
Nocardiopsis	0	0	0	0	1.16381e-05	0	0	0	0	0	0	9.63104e-06	0	0	0	0	0	0	0	0	0	0	0	0	0	0	0	0	0	0	0	0	0	0	0
Microbacterium	0	0	0	0	0	0	0	0	0	0	0	0	0	0	0	0	0	0	9.47086e-06	0	0	0	0	0	0	1.03531e-05	0	0	0	0	0	0	0	0	0
Micromonospora	0	0	0	0	0	0	0	0	0	0	0	0	0	0	0	0	0	0	0	0	0	0	0	0	0	0	0	0	0	1.80333e-05	0	0	0	0	0
Aquaspirillum	0	0	0	0	0	0	0	0	0	0	0	0	1.74435e-05	0	0	0	0	0	0	0	0	0	0	0	0	0	0	0	0	0	0	0	0	0	0
Microlunatus	0	0	0	0	0	0	0	0	0	0	0	0	0	0	0	0	0	0	0	0	0	1.43668e-05	0	0	0	0	0	0	0	0	0	0	0	0	0
Gracilibacillus	0	0	0	0	0	0	0	0	0	0	0	0	0	0	0	0	0	0	0	0	0	0	0	0	1.38385e-05	0	0	0	0	0	0	0	0	0	0
Methylocella	0	0	0	0	0	0	0	0	0	0	0	0	0	0	0	0	0	0	0	0	0	0	0	0	0	0	0	0	1.3028e-05	0	0	0	0	0	0
Thiomonas	0	0	0	0	1.16381e-05	0	0	0	0	0	0	0	0	0	0	0	0	0	0	0	0	0	0	0	0	0	0	0	0	0	0	0	0	0	0
Nonomuraea	0	0	0	0	0	0	0	0	0	0	0	0	0	0	0	0	0	0	0	0	0	0	0	0	0	0	0	1.09948e-05	0	0	0	0	0	0	0
Oligotropha	0	0	0	0	0	0	0	0	0	0	0	0	0	0	0	0	1.06459e-05	0	0	0	0	0	0	0	0	0	0	0	0	0	0	0	0	0	0
Pandoraea	0	0	0	0	0	0	0	0	0	0	0	0	0	1.05965e-05	0	0	0	0	0	0	0	0	0	0	0	0	0	0	0	0	0	0	0	0	0
Nitrobacter	0	0	0	0	0	0	0	1.04404e-05	0	0	0	0	0	0	0	0	0	0	0	0	0	0	0	0	0	0	0	0	0	0	0	0	0	0	0
Glutamicibacter	0	0	0	0	0	0	0	0	0	0	0	0	0	0	0	0	0	0	0	0	0	0	9.37761e-06	0	0	0	0	0	0	0	0	0	0	0	0
Acidithiobacillus	0	0	0	0	0	0	0	0	0	9.34606e-06	0	0	0	0	0	0	0	0	0	0	0	0	0	0	0	0	0	0	0	0	0	0	0	0	0
Aquitalea	0	0	0	0	0	0	0	0	0	0	0	0	0	0	0	7.62689e-06	0	0	0	0	0	0	0	0	0	0	0	0	0	0	0	0	0	0	0

## Sheet: M00531
	C0	C2	C5	C8	C11	C14	C17	MP0	MP2	MP5	MP8	MP11	MP14	MP17	EP0	EP2	EP5	EP8	EP11	EP14	EP17	PP0	PP2	PP5	PP8	PP11	PP14	PP17	BP0	BP2	BP5	BP8	BP11	BP14	BP17
Hyphomicrobium	0.000433207	0.000945602	0.000367009	0.000465199	0.00112889	0.00188657	0.00242074	0.00084567	0.00201697	0.000803761	0.0017986	0.00162765	0.00226765	0.00226765	0.000563857	0.00136521	0.00077715	0.00103898	0.00236772	0.00270547	0.00265646	0.000632138	0.00136913	0.00130491	0.00047051	0.00264005	0.00195913	0.00183613	0.00070351	0.000973798	0.000645186	0.000592159	0.00282068	0.00506245	0.00367204
Bradyrhizobium	0.000255986	0.000584554	0.000322523	0.000343361	0.000814664	0.000900794	0.000986229	0.000793469	0.00104778	0.000364496	0.000837441	0.00162765	0.00158736	0.00137754	0.000573926	0.00104488	0.000745212	0.000430284	0.00124068	0.00121399	0.000972787	0.000215502	0.000890873	0.000716227	0.000221417	0.000942136	0.000960356	0.000912569	0.000390839	0.000414766	0.000322593	0.000362547	0.000739044	0.000835857	0.0010298
Roseomonas	9.84562e-06	1.71928e-05	5.56075e-05	3.32285e-05	0.000209485	3.39922e-05	0.000143451	8.3523e-05	0.000183361	6.54224e-05	7.6131e-05	0.000520076	0.000715183	0.000158947	4.02755e-05	0.000160165	0.000170334	0.000115442	0.000350422	0.000433569	0.000361677	2.87336e-05	7.50209e-05	0.000196227	4.15156e-05	0.000890371	0.000451368	0.000241886	7.81677e-05	0.0001623	1.29037e-05	7.25093e-05	0.000985392	0.000804315	0.000325199
Bosea	6.89193e-05	3.43855e-05	2.2243e-05	3.32285e-05	8.14664e-05	0.000220949	1.79314e-05	0.000177486	0.000117875	0.000523379	0.000237909	0.000173359	0.000139548	3.17894e-05	0.000231584	0.000152538	0.000351314	0.000230884	8.52378e-05	8.67137e-05	4.98865e-05	0.000646505	0.000140664	0.000343396	0.000982536	0.000207063	0.000153657	8.79585e-05	0.000377811	0.000270499	0.000283882	0.000145019	0.000344887	0.00053621	0.000176149
Pirellula	9.84562e-05	0.00018912	8.89719e-05	8.86093e-05	0.000349142	0.000169961	0.000546909	0.000198367	0.000196459	7.47685e-05	0.000142746	0.000192621	0.000261652	0.000233122	0.000171171	0.000251687	0.000149042	0.000115442	0.000246242	0.000182099	0.000174603	7.18339e-05	0.000112531	0.000225661	4.15156e-05	0.000217416	0.000211278	0.000153927	0.000143308	0.000126233	5.16149e-05	0.000120849	0.000246348	0.000252334	0.000447148
Xanthobacter	0	0	0	0	0	0	0	0	1.30972e-05	8.41145e-05	0.000152262	0.000327455	0.0004012	9.53683e-05	0	0	3.19377e-05	4.19789e-05	2.84126e-05	0.00019077	3.74149e-05	1.43668e-05	0	7.84906e-05	0.000304448	0.000424479	0.000364935	0.000175917	0	0	0.00010323	3.62547e-05	0.000443426	0.000126167	5.41998e-05
Labrys	9.84562e-06	8.59638e-05	5.56075e-05	3.32285e-05	3.49142e-05	6.79844e-05	6.276e-05	0.000135725	9.16806e-05	9.34606e-06	3.80655e-05	0.000144466	0.000104661	0.000169544	8.0551e-05	0.000198299	3.19377e-05	3.14842e-05	5.68252e-05	4.33569e-05	6.23581e-05	5.74671e-05	7.50209e-05	0.000117736	2.76771e-05	6.21189e-05	5.76214e-05	6.59689e-05	5.21118e-05	5.40999e-05	2.58075e-05	4.83395e-05	6.1587e-05	7.88544e-05	0.0001084
Sulfuricurvum	0	0	2.2243e-05	0.000166142	0	0	3.58629e-05	0	0	0	0.000361622	7.70483e-05	0.000191878	1.05965e-05	4.02755e-05	1.52538e-05	1.06459e-05	0.000220389	2.84126e-05	6.06996e-05	6.23581e-05	0	0	0.000402264	0	1.03531e-05	1.92071e-05	2.19896e-05	0	0	0	0.00046406	0	6.30835e-05	1.355e-05
Methylocystis	0	3.43855e-05	3.33645e-05	1.10762e-05	3.49142e-05	0	0	0	1.30972e-05	0	0	6.74172e-05	6.97739e-05	4.23859e-05	0	3.81345e-05	2.12918e-05	4.19789e-05	0.000161005	0.000225456	0.000586166	0	2.81328e-05	0	0	8.28252e-05	0.000230486	0.000142933	0	0	1.29037e-05	1.20849e-05	4.92696e-05	0.000189251	0.000162599
Limnoglobus	4.92281e-05	5.15783e-05	5.56075e-05	1.10762e-05	9.31045e-05	3.39922e-05	0.000197246	3.13211e-05	6.54862e-05	1.86921e-05	5.70983e-05	6.74172e-05	0	8.47718e-05	0.000100689	0.000114403	4.25835e-05	0	0.000132592	7.80424e-05	4.98865e-05	5.74671e-05	6.56433e-05	6.86793e-05	2.76771e-05	9.31783e-05	0.000105639	1.09948e-05	2.60559e-05	0	0	6.04244e-05	7.39044e-05	6.30835e-05	9.48497e-05
Opitutus	0	1.71928e-05	2.2243e-05	3.32285e-05	6.98283e-05	0	0.000215177	3.13211e-05	5.23889e-05	2.80382e-05	5.70983e-05	8.66793e-05	6.97739e-05	4.23859e-05	1.00689e-05	5.33882e-05	3.19377e-05	0	2.84126e-05	9.53851e-05	4.98865e-05	0	4.6888e-05	2.9434e-05	4.15156e-05	4.14126e-05	5.76214e-05	6.59689e-05	1.3028e-05	1.80333e-05	2.58075e-05	0.000120849	6.1587e-05	6.30835e-05	5.41998e-05
Paenibacillus	0	0	0	3.32285e-05	2.32761e-05	3.39922e-05	8.96572e-06	0	0	9.34606e-06	0	1.92621e-05	0	1.05965e-05	1.00689e-05	7.62689e-06	0	2.09894e-05	1.89417e-05	2.60141e-05	1.24716e-05	0	4.6888e-05	9.81133e-06	0	1.03531e-05	5.76214e-05	2.19896e-05	1.3028e-05	5.40999e-05	1.29037e-05	0	6.1587e-05	1.57709e-05	0
Methylobacterium	0	0	0	0	4.65522e-05	1.69961e-05	8.96572e-06	0	1.30972e-05	0	9.51638e-06	9.63104e-06	0	0	2.01377e-05	0	0	0	0	0	1.24716e-05	0	1.87552e-05	9.81133e-06	8.30312e-05	1.03531e-05	0	0	3.90839e-05	0	1.29037e-05	8.45942e-05	3.69522e-05	0	4.06499e-05
Bacillus	0	1.71928e-05	0	1.10762e-05	2.32761e-05	0	0	1.04404e-05	0	9.34606e-06	9.51638e-06	9.63104e-06	0	1.05965e-05	0	2.28807e-05	1.06459e-05	0	2.84126e-05	0	0	0	2.81328e-05	1.96227e-05	1.38385e-05	4.14126e-05	0	2.19896e-05	1.3028e-05	9.01664e-05	0	0	4.92696e-05	0	2.70999e-05
Edaphobacter	0	1.71928e-05	1.11215e-05	1.10762e-05	4.65522e-05	1.69961e-05	0	3.13211e-05	1.30972e-05	9.34606e-06	9.51638e-06	0	5.23304e-05	1.05965e-05	1.00689e-05	3.81345e-05	0	1.04947e-05	9.47086e-06	8.67137e-06	0	0	1.87552e-05	1.96227e-05	0	0	0	0	0	3.60666e-05	1.29037e-05	6.04244e-05	0	0	0
Pseudorhodoplanes	0	0	1.11215e-05	0	0	0	1.79314e-05	0	0	9.34606e-06	9.51638e-06	2.88931e-05	0	1.05965e-05	0	2.28807e-05	2.12918e-05	0	1.89417e-05	1.73427e-05	2.49433e-05	0	2.81328e-05	9.81133e-06	0	0	9.60356e-06	4.39792e-05	0	1.80333e-05	0	0	4.92696e-05	4.73126e-05	2.70999e-05
Planctopirus	1.96912e-05	0	0	0	0	0	2.68971e-05	0	1.30972e-05	1.86921e-05	2.85491e-05	9.63104e-06	0	4.23859e-05	1.00689e-05	7.62689e-06	1.06459e-05	1.04947e-05	1.89417e-05	1.73427e-05	1.24716e-05	0	9.37761e-06	1.96227e-05	1.38385e-05	2.07063e-05	9.60356e-06	0	1.3028e-05	0	1.29037e-05	1.20849e-05	2.46348e-05	1.57709e-05	2.70999e-05
Singulisphaera	0	1.71928e-05	1.11215e-05	2.21523e-05	2.32761e-05	1.69961e-05	8.96572e-06	2.08808e-05	2.61945e-05	1.86921e-05	0	0	0	0	1.00689e-05	7.62689e-06	0	1.04947e-05	0	8.67137e-06	0	0	9.37761e-06	2.9434e-05	0	0	9.60356e-06	0	0	0	0	0	0	0	0
Phreatobacter	9.84562e-06	0	0	0	0	0	8.96572e-06	0	1.30972e-05	2.80382e-05	2.85491e-05	9.63104e-06	0	0	0	0	0	0	0	0	0	0	1.87552e-05	0	1.38385e-05	0	9.60356e-06	0	0	0	0	0	0	0	0
Terriglobus	0	0	0	0	1.16381e-05	0	8.96572e-06	0	0	0	0	0	0	2.1193e-05	1.00689e-05	0	0	0	0	8.67137e-06	0	0	9.37761e-06	0	0	0	9.60356e-06	0	0	1.80333e-05	0	0	0	0	0
Methylorubrum	0	0	0	0	1.16381e-05	0	0	1.04404e-05	0	0	0	0	0	0	0	0	1.06459e-05	0	0	8.67137e-06	0	0	0	0	0	0	9.60356e-06	0	0	1.80333e-05	0	1.20849e-05	0	0	0
Filomicrobium	0	0	0	0	0	0	8.96572e-06	1.04404e-05	0	0	0	0	0	0	0	0	0	0	9.47086e-06	8.67137e-06	0	0	0	9.81133e-06	0	1.03531e-05	0	0	0	0	1.29037e-05	0	0	0	0
Herpetosiphon	9.84562e-06	0	0	0	0	0	8.96572e-06	0	0	0	0	0	0	0	0	0	0	0	0	0	0	0	0	0	0	0	0	0	0	0	0	0	2.46348e-05	1.57709e-05	0
Rhodopirellula	0	0	0	0	0	1.69961e-05	0	0	0	0	0	0	0	1.05965e-05	0	7.62689e-06	0	1.04947e-05	0	0	0	0	9.37761e-06	0	0	0	0	0	0	0	0	0	0	0	0
Rhodopseudomonas	0	0	0	1.10762e-05	0	0	0	0	0	0	0	0	0	1.05965e-05	0	7.62689e-06	0	0	0	0	0	0	0	0	0	0	0	0	0	0	0	0	1.23174e-05	0	0
Variibacter	0	0	1.11215e-05	0	0	0	0	0	0	0	0	0	0	0	0	7.62689e-06	0	0	0	0	0	1.43668e-05	0	0	0	0	0	0	0	0	0	0	0	0	0
Methyloceanibacter	0	0	0	0	0	0	0	0	0	0	0	0	0	0	0	0	0	1.04947e-05	9.47086e-06	0	0	0	0	0	0	1.03531e-05	0	0	0	0	0	0	0	0	0
Brevibacillus	0	0	0	0	1.16381e-05	1.69961e-05	0	0	0	0	0	0	0	0	0	0	0	0	0	0	0	0	0	0	0	0	0	0	0	0	0	0	0	0	0
Paludisphaera	0	0	0	0	0	0	0	1.04404e-05	0	0	0	0	0	0	0	0	0	0	0	0	0	0	0	0	0	1.03531e-05	0	0	0	0	0	0	0	0	0
Methylocella	0	0	0	0	0	0	0	0	0	0	0	0	0	0	0	0	0	0	0	0	0	0	0	0	0	0	0	0	1.3028e-05	0	0	0	0	0	0
Sulfurimonas	0	0	0	0	0	0	0	0	0	0	0	0	0	0	0	0	0	0	0	0	0	0	0	0	0	1.03531e-05	0	0	0	0	0	0	0	0	0
Acidianus	0	0	0	0	0	0	8.96572e-06	0	0	0	0	0	0	0	0	0	0	0	0	0	0	0	0	0	0	0	0	0	0	0	0	0	0	0	0

## Sheet: M00595
	C0	C2	C5	C8	C11	C14	C17	MP0	MP2	MP5	MP8	MP11	MP14	MP17	EP0	EP2	EP5	EP8	EP11	EP14	EP17	PP0	PP2	PP5	PP8	PP11	PP14	PP17	BP0	BP2	BP5	BP8	BP11	BP14	BP17
Sphaerotilus	0.000118147	0.000137542	0.000133458	0.000221523	0.000721559	3.39922e-05	0.00114761	5.22019e-05	0.00155857	0.000579455	0.00195086	0.00748331	0.00387245	0.00122919	0.000140964	0.000709301	0.00170334	0.00435531	0.0109294	0.00426631	0.00445237	1.43668e-05	0.000647055	0.000421887	0.00192356	0.00355113	0.000528196	0.00814715	6.51398e-05	0.000847565	0.000141941	0.00238072	0.0148671	0.00979372	0.0103793
Anaeromyxobacter	0.00031506	0.000429819	0.00141243	0.000465199	0.00272331	1.69961e-05	0.0012821	0.000699505	0.00116565	0.000598148	0.00181763	0.00509482	0.00495395	0.00522406	0.00035241	0.00160927	0.00105394	0.00130134	0.00678114	0.0068157	0.00409069	0.000373536	0.00131287	0.00109887	0.000484349	0.0135937	0.00486901	0.00260577	0.00050809	0.000955764	0.000400015	0.000954706	0.00953366	0.0024918	0.00333329
Hydrogenophaga	0.000177221	0.000206313	0.000389252	0.00014399	0.000302589	3.39922e-05	0.00127313	0.000114844	0.00352316	0.00113087	0.00172246	0.00340939	0.00448298	0.00163186	0.000120826	0.00141098	0.000521648	0.00110195	0.00243401	0.00510744	0.00760769	0.000129301	0.0020537	0.00127547	0.000650411	0.00653283	0.00274662	0.00204504	0.000182391	0.00308369	0.00144522	0.00209069	0.00495159	0.00271259	0.00310294
Dechloromonas	0.000255986	0.000206313	0.000767383	0.000420894	0.000814664	6.79844e-05	0.000430354	0.000970955	0.00193839	0.000429919	0.000637597	0.0015506	0.00305261	0.00111263	0.000694752	0.009587	0.000489711	0.000682157	0.000975499	0.00164756	0.00430271	0.000229869	0.00110656	0.000510189	0.000318286	0.00348901	0.00521474	0.00225394	0.000390839	0.000775431	0.000400015	0.00211486	0.00284532	0.00402158	0.00401079
Hyphomicrobium	0.000433207	0.000945602	0.000367009	0.000465199	0.00112889	0.00188657	0.00242074	0.00084567	0.00201697	0.000803761	0.0017986	0.00162765	0.00226765	0.00226765	0.000563857	0.00136521	0.00077715	0.00103898	0.00236772	0.00270547	0.00265646	0.000632138	0.00136913	0.00130491	0.00047051	0.00264005	0.00195913	0.00183613	0.00070351	0.000973798	0.000645186	0.000592159	0.00282068	0.00506245	0.00367204
Janthinobacterium	0.000541509	0.000326663	0.000266916	0.001163	0	0.00138518	0	0.000104404	1.30972e-05	0.00826191	0.00186521	9.63104e-06	0	0	0.000513512	7.62689e-06	0.00540811	0	9.47086e-06	8.67137e-06	0	0.00110624	0	0	0.000110708	0	0	0	7.81677e-05	1.80333e-05	0.0161813	0.00560739	0	0	0.00203249
Bradyrhizobium	0.000255986	0.000584554	0.000322523	0.000343361	0.000814664	0.000900794	0.000986229	0.000793469	0.00104778	0.000364496	0.000837441	0.00162765	0.00158736	0.00137754	0.000573926	0.00104488	0.000745212	0.000430284	0.00124068	0.00121399	0.000972787	0.000215502	0.000890873	0.000716227	0.000221417	0.000942136	0.000960356	0.000912569	0.000390839	0.000414766	0.000322593	0.000362547	0.000739044	0.000835857	0.0010298
Ralstonia	0.000187067	0.000206313	0.000144579	0.000155066	0.000429444	0.000237946	0.000699326	0.000386294	0.000275042	0.000102807	0.000333073	0.00153133	0.00034887	0.000349684	0.000201377	0.000167792	0.000159688	0.000388305	0.00170476	0.000546296	0.000174603	0.000531571	0.000309461	0.000245283	0.00261548	0.00297135	0.000508989	0.000879585	0.000377811	9.01664e-05	6.45186e-05	0.00348045	0.00406474	0.000268105	0.000867197
Polynucleobacter	0	6.87711e-05	6.67289e-05	0.00014399	0.000317719	0	0.000968297	0	0	4.67303e-05	0.000171295	0.000886055	0.000191878	0.000148351	0	7.62689e-06	0	9.44525e-05	0.00457443	0.000182099	0.000636053	2.87336e-05	1.87552e-05	0.000137359	0.00037364	0.00445185	0.000345728	0.000241886	0	1.80333e-05	2.58075e-05	0.00155895	0.000960757	0.000378501	0.000555548
Thauera	0	0	2.2243e-05	4.43046e-05	0.000186209	1.69961e-05	0.000421389	4.17615e-05	3.92917e-05	2.80382e-05	5.70983e-05	0.000115572	0.000331426	0.000254315	4.02755e-05	0.00022118	3.19377e-05	0.000146926	0.000407247	0.0022719	0.00740815	1.43668e-05	0.000103154	3.92453e-05	0	0.000320948	0.0005378	0.000241886	0	0.000126233	0	8.45942e-05	0.000431109	0.000520439	0.000785897
Sulfuricaulis	0.000137839	0.000429819	0.000289159	0.000199371	0.00103579	1.69961e-05	0.000762086	0.000417615	0.000484598	9.34606e-05	0.000475819	0.000491183	0.000540748	0.0011868	0.00035241	0.000671167	0.000212918	0.000167916	0.000823965	0.000528954	0.000411564	0.000229869	0.000478258	0.000500378	6.91927e-05	0.000683308	0.0005378	0.000241886	0.000169363	0.000270499	6.45186e-05	0.00047131	0.000628187	0.000220792	0.000406499
Ramlibacter	5.90737e-05	0.00018912	0.000200187	0.000110762	0.000721559	0.000101977	0.000268971	0.000187927	0.000694153	0.000177575	0.000218877	0.000606755	0.000488418	0.000466245	0.000211446	0.00056439	0.000234209	0.000146926	0.000852378	0.000364198	0.000299319	0.000186768	0.000375104	0.000313963	2.76771e-05	0.00131485	0.000336125	0.000109948	0.000143308	0.000234433	0.000116134	7.25093e-05	0.000862218	0.000268105	0.000230349
Sulfuritalea	3.93825e-05	0.000275084	0.000433738	0.000166142	0.000570265	1.69961e-05	0.000233109	0.000344532	0.000497695	7.47685e-05	0.000409204	0.00046229	0.00075007	0.000339087	0.000100689	0.000419479	0.000223564	0.000283357	0.000322009	0.000303498	0.000311791	5.74671e-05	0.000253195	0.000274717	5.53541e-05	0.000476245	0.000441764	0.000263875	6.51398e-05	0.000360666	0.000116134	0.000954706	0.000591235	0.000252334	0.000853647
Meiothermus	0.000187067	0.000378241	0.000189065	0.000243676	0.000488798	0.000356918	0.000591737	0.000344532	0.000550084	0.000158883	0.000218877	0.000250407	0.000418644	0.000455648	0.000161102	0.00056439	0.000127751	0.000188905	0.000492485	0.000398883	0.000411564	0.000172401	0.000159419	0.000225661	5.53541e-05	0.000331301	0.00040335	0.000307855	0.000117252	9.01664e-05	7.74224e-05	0.000302122	0.0002833	0.000141938	0.000460698
Rhodoferax	0.000187067	1.71928e-05	0.000244673	3.32285e-05	6.98283e-05	1.69961e-05	0.000286903	0.00131549	0.000536987	0.000158883	0.000142746	6.74172e-05	3.4887e-05	2.1193e-05	0.000604132	0.000198299	0.000244855	0.000209894	3.78835e-05	4.33569e-05	7.48298e-05	0.00139358	0.000346972	0.000313963	8.30312e-05	5.17657e-05	3.84143e-05	6.59689e-05	0.000951041	0.000703298	2.58075e-05	0.000422971	0	0	0.0001084
Comamonas	7.8765e-05	5.15783e-05	3.33645e-05	2.21523e-05	2.32761e-05	1.69961e-05	1.79314e-05	0.000135725	0.000969195	0.000224305	0.000704212	0.000452659	0.000470974	0.000116561	0.000100689	0.00428631	0.000212918	0.000241379	0.000123121	0.000182099	3.74149e-05	1.43668e-05	9.37761e-06	9.81133e-06	1.38385e-05	0	0	1.09948e-05	2.60559e-05	3.60666e-05	1.29037e-05	3.62547e-05	2.46348e-05	1.57709e-05	2.70999e-05
Bosea	6.89193e-05	3.43855e-05	2.2243e-05	3.32285e-05	8.14664e-05	0.000220949	1.79314e-05	0.000177486	0.000117875	0.000523379	0.000237909	0.000173359	0.000139548	3.17894e-05	0.000231584	0.000152538	0.000351314	0.000230884	8.52378e-05	8.67137e-05	4.98865e-05	0.000646505	0.000140664	0.000343396	0.000982536	0.000207063	0.000153657	8.79585e-05	0.000377811	0.000270499	0.000283882	0.000145019	0.000344887	0.00053621	0.000176149
Methyloversatilis	6.89193e-05	0.000154735	0.000189065	5.53808e-05	0.000488798	0	0.000304834	0	0.000366723	4.67303e-05	8.56474e-05	0.000317824	0.000244209	0.000127158	0	7.62689e-05	1.06459e-05	6.29683e-05	0.000151534	0.000225456	0.00053628	0	0.000450125	0.000176604	0.000110708	0.000817899	0.000230486	0.000208901	1.3028e-05	0.000252466	0.000116134	0.000181273	0.000837583	0.000394272	0.000311649
Thiobacillus	4.92281e-05	0.00018912	0.000266916	0.000132914	0.000430608	0	0.00018828	0.000261009	0.000196459	0.000102807	0.000237909	0.000269669	0.000453531	0.000413263	0.000241653	0.000289822	0.000149042	0.000167916	0.000227301	0.000320841	0.000124716	0.000201135	0.00023444	0.000264906	9.68697e-05	0.000217416	0.000259296	0.000142933	0.000208447	0.000180333	2.58075e-05	0.000531735	0.000172444	0.000141938	0.0001084
Sulfuricurvum	0	0	2.2243e-05	0.000166142	0	0	3.58629e-05	0	0	0	0.000361622	7.70483e-05	0.000191878	1.05965e-05	4.02755e-05	1.52538e-05	1.06459e-05	0.000220389	2.84126e-05	6.06996e-05	6.23581e-05	0	0	0.000402264	0	1.03531e-05	1.92071e-05	2.19896e-05	0	0	0	0.0046406	0	6.30835e-05	1.355e-05
Leptothrix	0	0	5.56075e-05	1.10762e-05	0.000232761	0	5.37943e-05	1.04404e-05	7.85834e-05	3.73842e-05	6.66146e-05	4.81552e-05	6.97739e-05	4.23859e-05	1.00689e-05	7.62689e-06	4.25835e-05	6.29683e-05	5.68252e-05	9.53851e-05	0.000187074	0	3.75104e-05	0	2.76771e-05	0.000310594	5.76214e-05	0.000186912	2.60559e-05	5.40999e-05	1.29037e-05	7.25093e-05	0.000394157	0.00255488	0.000718147
Cupriavidus	5.90737e-05	6.87711e-05	0.000122336	4.43046e-05	0.000267675	0.000118973	0.000107589	0.000198367	0.000222653	6.54224e-05	7.6131e-05	0.00018299	0.000156991	0.000190737	0.000100689	0.000648286	0.000223564	0.000157421	0.000255713	0.000277484	0.000112245	7.18339e-05	9.37761e-05	0.000137359	8.30312e-05	0.000269182	0.000172864	0.000109948	6.51398e-05	0.000126233	5.16149e-05	0.000145019	0.000295617	0.000110396	8.12997e-05
Xanthobacter	0	0	0	0	0	0	0	0	1.30972e-05	8.41145e-05	0.000152262	0.000327455	0.0004012	9.53683e-05	0	0	3.19377e-05	4.19789e-05	2.84126e-05	0.00019077	3.74149e-05	1.43668e-05	0	7.84906e-05	0.000304448	0.000424479	0.000364935	0.000175917	0	0	0.00010323	3.62547e-05	0.000443426	0.000126167	5.41998e-05
Ancylobacter	0	0	0	0	2.32761e-05	1.69961e-05	1.79314e-05	0	1.30972e-05	2.80382e-05	9.51638e-06	0.000337086	5.23304e-05	0	1.00689e-05	7.62689e-06	0	0	2.84126e-05	5.20282e-05	7.48298e-05	0	0	0	5.53541e-05	0.00128379	0.000124846	4.39792e-05	2.60559e-05	0	1.29037e-05	7.25093e-05	0.000874535	9.46253e-05	8.12997e-05
Mesorhizobium	4.92281e-05	3.43855e-05	6.67289e-05	8.86093e-05	0.000104743	0.000220949	6.276e-05	0.000114844	0.000183361	4.67303e-05	5.70983e-05	0.000202252	0.000122104	0.000148351	0.000110758	0.000198299	8.51671e-05	0.000115442	0.000123121	7.80424e-05	7.48298e-05	0.000129301	0.000140664	6.86793e-05	0	0.000144944	2.88107e-05	4.39792e-05	3.90839e-05	5.40999e-05	2.58075e-05	3.62547e-05	7.39044e-05	7.88544e-05	4.06499e-05
Defluviimonas	4.92281e-05	3.43855e-05	6.67289e-05	2.21523e-05	0.000221123	0.000101977	0.000233109	7.30826e-05	0.000104778	7.47685e-05	4.75819e-05	3.85241e-05	0.000122104	0.000105965	8.0551e-05	7.62689e-05	5.32294e-05	3.14842e-05	0.000123121	0.000173427	0.000137188	2.87336e-05	4.6888e-05	7.84906e-05	8.30312e-05	0.000186357	4.80178e-05	0.000120943	7.81677e-05	1.80333e-05	5.16149e-05	8.45942e-05	0.000197078	6.30835e-05	9.48497e-05
Azospirillum	9.84562e-06	1.71928e-05	1.11215e-05	0	1.16381e-05	0	0	0	1.30972e-05	0.000205613	2.85491e-05	0.000144466	1.74435e-05	0	9.06198e-05	0	2.12918e-05	0	9.47086e-06	3.46855e-05	1.24716e-05	0	0	0	1.38385e-05	5.17657e-05	3.84143e-05	0	6.51398e-05	7.21332e-05	5.16149e-05	0.00152269	3.69522e-05	0.000583523	2.70999e-05
Rhodobacter	2.95369e-05	1.71928e-05	1.11215e-05	2.21523e-05	8.14664e-05	3.39922e-05	0.00018828	1.04404e-05	7.85834e-05	4.67303e-05	7.6131e-05	7.70483e-05	6.97739e-05	0.000116561	3.02066e-05	3.81345e-05	1.06459e-05	6.29683e-05	0.000104179	0.000130071	0.000199546	2.87336e-05	2.81328e-05	9.81133e-06	8.30312e-05	0.000134591	7.68285e-05	4.39792e-05	5.21118e-05	3.60666e-05	0	2.41698e-05	0.000160126	0.000646606	0.000257449
Variovorax	4.92281e-05	5.15783e-05	5.56075e-05	3.32285e-05	6.98283e-05	8.49805e-05	3.58629e-05	0.000114844	1.30972e-05	4.67303e-05	4.75819e-05	4.81552e-05	1.74435e-05	1.05965e-05	0.000100689	0.00012203	0.000159688	3.14842e-05	9.47086e-05	4.33569e-05	4.98865e-05	0.000158035	4.6888e-05	0.000166793	2.76771e-05	2.07063e-05	9.60356e-06	0	0.00013028	5.40999e-05	2.58075e-05	0	3.69522e-05	3.15418e-05	1.355e-05
Sulfuriferula	9.84562e-06	0	0	0	0	0	0	0	0	0	0	0	0	0	0	0	4.25835e-05	0	0	0	0	0	0	1.96227e-05	0	0	0	0	0	0	0	0.00123266	0	0	0
Limnobacter	5.90737e-05	0	0	0	0	0	0	0.000125285	1.30972e-05	0	0	0	0	0	0.000342342	0	0	0	0	0	0	0	1.87552e-05	0	0	0	0	0	1.3028e-05	0.000234433	0	1.20849e-05	0	0	1.355e-05
Sideroxydans	9.84562e-06	1.71928e-05	2.2243e-05	3.32285e-05	8.14664e-05	0	1.79314e-05	1.04404e-05	0	1.86921e-05	1.90328e-05	3.85241e-05	1.74435e-05	1.05965e-05	1.00689e-05	4.57614e-05	0	0	1.89417e-05	1.73427e-05	1.24716e-05	0	0	3.92453e-05	0	5.17657e-05	2.88107e-05	3.29844e-05	1.3028e-05	1.80333e-05	0	0.000120849	6.1587e-05	3.15418e-05	2.70999e-05
Magnetospirillum	0	0	5.56075e-05	0	1.16381e-05	0	8.96572e-06	0	9.16806e-05	6.54224e-05	2.85491e-05	9.63104e-05	0	2.1193e-05	0	2.28807e-05	0	0	2.84126e-05	2.60141e-05	3.74149e-05	0	9.37761e-06	9.81133e-06	0	1.03531e-05	0	0	0	0	0	1.20849e-05	3.69522e-05	0	4.06499e-05
Polaromonas	3.93825e-05	3.43855e-05	1.11215e-05	3.32285e-05	0	5.09883e-05	0	1.04404e-05	0	0	1.90328e-05	4.81552e-05	0	1.05965e-05	9.06198e-05	0	2.12918e-05	3.14842e-05	0	0	0	2.87336e-05	0	0	4.15156e-05	1.03531e-05	0	2.19896e-05	1.3028e-05	0	0	1.20849e-05	0	1.57709e-05	2.70999e-05
Methylobacterium	0	0	0	0	4.65522e-05	1.69961e-05	8.96572e-06	0	1.30972e-05	0	9.51638e-06	9.63104e-06	0	0	2.01377e-05	0	0	0	0	0	1.24716e-05	0	1.87552e-05	9.81133e-06	8.30312e-05	1.03531e-05	0	0	3.90839e-05	0	1.29037e-05	8.45942e-05	3.69522e-05	0	4.06499e-05
Pseudorhodoplanes	0	0	1.11215e-05	0	0	0	1.79314e-05	0	0	9.34606e-06	9.51638e-06	2.88931e-05	0	1.05965e-05	0	2.28807e-05	2.12918e-05	0	1.89417e-05	1.73427e-05	2.49433e-05	0	2.81328e-05	9.81133e-06	0	0	9.60356e-06	4.39792e-05	0	1.80333e-05	0	0	4.92696e-05	4.73126e-05	2.70999e-05
Rhizobium	0	1.71928e-05	2.2243e-05	0	1.16381e-05	5.09883e-05	8.96572e-06	4.17615e-05	0	0	0	2.88931e-05	0	2.1193e-05	2.01377e-05	1.52538e-05	1.06459e-05	1.04947e-05	1.89417e-05	0	1.24716e-05	0	0	1.96227e-05	2.76771e-05	1.03531e-05	0	0	1.3028e-05	0	0	3.62547e-05	1.23174e-05	0	1.355e-05
Limnohabitans	4.92281e-05	0	0	0	0	0	0	3.13211e-05	1.30972e-05	9.34606e-06	9.51638e-06	4.81552e-05	0	0	5.03444e-05	0	0	0	0	0	0	1.43668e-05	0	9.81133e-06	2.76771e-05	0	0	1.09948e-05	0	0	0	0.000108764	0	1.57709e-05	0
Azoarcus	0	0	0	0	0	0	8.96572e-06	0	0	0	0	0	0	0	0	7.62689e-06	1.06459e-05	1.04947e-05	1.89417e-05	8.67137e-06	1.24716e-05	0	0	0	0	2.07063e-05	2.88107e-05	8.79585e-05	0	0	0	0	3.69522e-05	7.88544e-05	1.355e-05
Agrobacterium	9.84562e-06	1.71928e-05	0	0	1.16381e-05	0	0	2.08808e-05	1.30972e-05	0	0	3.85241e-05	1.74435e-05	0	0	6.10151e-05	1.06459e-05	1.04947e-05	0	0	0	0	0	0	0	2.07063e-05	0	0	1.3028e-05	0	0	1.20849e-05	0	0	2.70999e-05
Methylibium	0	0	1.11215e-05	1.10762e-05	0	0	2.68971e-05	0	1.30972e-05	0	0	0	0	0	0	0	0	0	0	0	0	0	0	0	0	5.17657e-05	1.92071e-05	0	0	0	0	0	4.92696e-05	3.15418e-05	6.77498e-05
Achromobacter	0	0	0	0	0	0	8.96572e-06	0	0	0	0	2.88931e-05	0	2.1193e-05	0	1.52538e-05	3.19377e-05	0	9.47086e-06	0	0	0	1.87552e-05	0	1.38385e-05	1.03531e-05	2.88107e-05	0	0	1.80333e-05	0	2.41698e-05	2.46348e-05	1.57709e-05	0
Sulfuricella	0	0	1.11215e-05	1.10762e-05	3.49142e-05	0	0	1.04404e-05	0	9.34606e-06	0	9.63104e-06	1.74435e-05	0	0	0	1.06459e-05	0	0	0	0	0	1.87552e-05	3.92453e-05	0	2.07063e-05	0	0	0	1.80333e-05	0	4.83395e-05	0	0	0
Phreatobacter	9.84562e-06	0	0	0	0	0	8.96572e-06	0	1.30972e-05	2.80382e-05	2.85491e-05	9.63104e-06	0	0	0	0	0	0	0	0	0	0	1.87552e-05	0	1.38385e-05	0	9.60356e-06	0	0	0	0	0	0	0	0
Herminiimonas	0	0	0	0	0	0	0	0	0	0	0	0	0	0	0.000120826	0	0	0	0	0	0	0	0	0	1.38385e-05	0	0	0	0	0	0	0	0	0	0
Marinobacter	0	0	0	0	0	0	0	0	0	0	0	0	0	0	0	0	0	0	0	0	0	0	9.37761e-05	0	0	0	0	0	0	1.80333e-05	0	0	0	0	0
Acidiphilium	0	0	0	0	0	0	0	1.04404e-05	0	1.86921e-05	1.90328e-05	9.63104e-06	1.74435e-05	2.1193e-05	0	0	0	0	0	0	0	0	0	0	0	0	0	0	0	0	0	0	0	0	0
Chlorobium	0	0	0	0	0	0	0	0	0	0	0	0	6.97739e-05	1.05965e-05	0	0	0	0	0	0	0	0	0	0	0	0	0	0	0	0	0	0	0	0	1.355e-05
Chlorobaculum	0	0	0	0	0	0	0	0	0	0	0	0	3.4887e-05	0	0	0	0	0	0	0	2.49433e-05	0	0	0	0	3.10594e-05	0	0	0	0	0	0	0	0	0
Methylorubrum	0	0	0	0	1.16381e-05	0	0	1.04404e-05	0	0	0	0	0	0	0	0	1.06459e-05	0	0	8.67137e-06	0	0	0	0	0	0	9.60356e-06	0	0	1.80333e-05	0	1.20849e-05	0	0	0
Filomicrobium	0	0	0	0	0	0	8.96572e-06	1.04404e-05	0	0	0	0	0	0	0	0	0	0	9.47086e-06	8.67137e-06	0	0	0	9.81133e-06	0	1.03531e-05	0	0	0	0	1.29037e-05	0	0	0	0
Paracoccus	0	0	0	0	1.16381e-05	0	0	0	0	0	0	0	0	0	0	7.62689e-06	0	0	0	0	0	0	0	0	1.38385e-05	0	0	0	0	0	0	0	0	1.57709e-05	1.355e-05
Vitreoscilla	0	0	0	0	1.16381e-05	0	0	0	0	0	0	0	0	0	0	0	0	0	0	0	0	0	0	0	0	2.07063e-05	0	0	0	0	0	0	0	1.57709e-05	0
Thermus	0	0	0	0	0	0	0	0	0	0	0	0	0	0	0	0	0	1.04947e-05	1.89417e-05	0	0	0	0	0	0	0	0	0	0	1.80333e-05	0	0	0	0	0
Methylomicrobium	0	0	0	0	0	0	0	0	0	0	0	0	0	0	0	0	0	0	0	8.67137e-06	0	0	0	0	0	0	9.60356e-06	0	0	0	0	0	1.23174e-05	0	1.355e-05
Rhodopseudomonas	0	0	0	1.10762e-05	0	0	0	0	0	0	0	0	0	1.05965e-05	0	7.62689e-06	0	0	0	0	0	0	0	0	0	0	0	0	0	0	0	0	1.23174e-05	0	0
Sulfurospirillum	0	0	0	0	0	0	0	0	0	0	0	1.92621e-05	0	0	0	0	0	0	0	0	0	0	0	0	0	0	0	0	0	1.80333e-05	0	0	0	0	0
Variibacter	0	0	1.11215e-05	0	0	0	0	0	0	0	0	0	0	0	0	7.62689e-06	0	0	0	0	0	1.43668e-05	0	0	0	0	0	0	0	0	0	0	0	0	0
Thiomonas	0	0	0	0	1.16381e-05	0	0	0	0	0	0	0	0	0	0	0	0	0	0	0	0	0	0	0	0	0	0	0	0	0	0	0	0	0	0
Oligotropha	0	0	0	0	0	0	0	0	0	0	0	0	0	0	0	0	1.06459e-05	0	0	0	0	0	0	0	0	0	0	0	0	0	0	0	0	0	0
Pandoraea	0	0	0	0	0	0	0	0	0	0	0	0	0	1.05965e-05	0	0	0	0	0	0	0	0	0	0	0	0	0	0	0	0	0	0	0	0	0
Nitrobacter	0	0	0	0	0	0	0	1.04404e-05	0	0	0	0	0	0	0	0	0	0	0	0	0	0	0	0	0	0	0	0	0	0	0	0	0	0	0
Melaminivora	0	0	0	0	0	0	0	1.04404e-05	0	0	0	0	0	0	0	0	0	0	0	0	0	0	0	0	0	0	0	0	0	0	0	0	0	0	0
Sulfurimonas	0	0	0	0	0	0	0	0	0	0	0	0	0	0	0	0	0	0	0	0	0	0	0	0	0	1.03531e-05	0	0	0	0	0	0	0	0	0
Acidithiobacillus	0	0	0	0	0	0	0	0	0	9.34606e-06	0	0	0	0	0	0	0	0	0	0	0	0	0	0	0	0	0	0	0	0	0	0	0	0	0

## Sheet: M00596
	C0	C2	C5	C8	C11	C14	C17	MP0	MP2	MP5	MP8	MP11	MP14	MP17	EP0	EP2	EP5	EP8	EP11	EP14	EP17	PP0	PP2	PP5	PP8	PP11	PP14	PP17	BP0	BP2	BP5	BP8	BP11	BP14	BP17
Desulfocapsa	0	0.000326663	0.000600561	0.000797483	0.000279313	0.000339922	0.000573806	0	9.16806e-05	0.00116826	0.0016273	0.00225366	0.00139548	0.00132456	7.04821e-05	0.000312703	0.000830379	0.000566715	0.00098497	0.00069371	0.000212018	1.43668e-05	5.62656e-05	0.000794718	0.000221417	0.000683308	0.000643439	0.000340839	0.000117252	5.40999e-05	0.000387112	0.00117223	0.00109625	0.00070969	0.000501348
Desulfobulbus	1.96912e-05	8.59638e-05	0.000311402	0.000232599	0.000221123	0.000849805	0.000134486	8.3523e-05	0.000209556	0.000635532	0.000485335	0.000982366	0.000837287	0.000773543	0.000161102	0.000388972	0.000340668	0.000304347	0.000511427	0.000598325	0.000199546	0.000114934	9.37761e-05	0.00103019	0.000733442	0.0014805	0.00164221	0.00113247	0.000286615	0.0001623	0.000116134	0.000725093	0.000591235	0.00036273	0.000270999
Sulfuricaulis	0.000137839	0.000429819	0.000289159	0.000199371	0.00103579	0.000169961	0.000762086	0.000417615	0.000484598	9.34606e-05	0.000475819	0.000491183	0.000540748	0.0011868	0.00035241	0.000671167	0.000212918	0.000167916	0.000823965	0.000528954	0.000411564	0.000229869	0.000478258	0.000500378	6.91927e-05	0.000683308	0.0005378	0.000241886	0.000169363	0.000270499	6.45186e-05	0.00047131	0.000628187	0.000220792	0.000406499
Sulfuritalea	3.93825e-05	0.000275084	0.000433738	0.000166142	0.000570265	1.69961e-05	0.000233109	0.000344532	0.000497695	7.47685e-05	0.000409204	0.00046229	0.00075007	0.000339087	0.000100689	0.000419479	0.000223564	0.000283357	0.000322009	0.000303498	0.000311791	5.74671e-05	0.000253195	0.000274717	5.53541e-05	0.000476245	0.000441764	0.000263875	6.51398e-05	0.000360666	0.000116134	0.000954706	0.000591235	0.000252334	0.000853647
Thiobacillus	4.92281e-05	0.00018912	0.000266916	0.000132914	0.000430608	0	0.00018828	0.000261009	0.000196459	0.000102807	0.000237909	0.000269669	0.000453531	0.000413263	0.000241653	0.000289822	0.000149042	0.000167916	0.000227301	0.000320841	0.000124716	0.000201135	0.00023444	0.000264906	9.68697e-05	0.000217416	0.000259296	0.000142933	0.000208447	0.000180333	2.58075e-05	0.000531735	0.000172444	0.000141938	0.0001084
Desulfobacula	0	0	1.11215e-05	8.86093e-05	1.16381e-05	0	8.96572e-06	0	0	1.86921e-05	0.000114197	6.74172e-05	8.72174e-05	4.23859e-05	0	0	0	5.24736e-05	1.89417e-05	2.60141e-05	0	0	0	6.86793e-05	4.15156e-05	5.17657e-05	1.92071e-05	0	0	0	1.29037e-05	0.000120849	3.69522e-05	0	0
Desulfovibrio	0	0	6.67289e-05	4.43046e-05	4.65522e-05	0	8.96572e-06	0	1.30972e-05	8.41145e-05	1.90328e-05	5.77862e-05	5.23304e-05	2.1193e-05	2.01377e-05	1.52538e-05	1.06459e-05	0	2.84126e-05	8.67137e-06	0	0	0	1.96227e-05	6.91927e-05	1.03531e-05	6.7225e-05	0	0	0	1.29037e-05	9.66791e-05	4.92696e-05	1.57709e-05	0
Sideroxydans	9.84562e-06	1.71928e-05	2.2243e-05	3.32285e-05	8.14664e-05	0	1.79314e-05	1.04404e-05	0	1.86921e-05	1.90328e-05	3.85241e-05	1.74435e-05	1.05965e-05	1.00689e-05	4.57614e-05	0	0	1.89417e-05	1.73427e-05	1.24716e-05	0	0	3.92453e-05	0	5.17657e-05	2.88107e-05	3.29844e-05	1.3028e-05	1.80333e-05	0	0.000120849	6.1587e-05	3.15418e-05	2.70999e-05
Desulfomicrobium	0	0	1.11215e-05	0	0	0	0	0	0	0.000140191	2.85491e-05	2.88931e-05	5.23304e-05	1.05965e-05	0	1.52538e-05	2.12918e-05	5.24736e-05	2.84126e-05	2.60141e-05	0	0	0	9.81133e-06	6.91927e-05	4.14126e-05	6.7225e-05	0	1.3028e-05	0	2.58075e-05	9.66791e-05	4.92696e-05	3.15418e-05	0
Syntrophobacter	0	0	0	2.21523e-05	3.49142e-05	0	8.06914e-05	0	0	0	9.51638e-06	7.70483e-05	1.74435e-05	6.35789e-05	0	0	0	0	2.84126e-05	1.73427e-05	0	0	0	9.81133e-06	0	3.10594e-05	6.7225e-05	4.39792e-05	0	0	0	1.20849e-05	3.69522e-05	3.15418e-05	2.70999e-05
Desulfomonile	0	1.71928e-05	0	1.10762e-05	3.49142e-05	1.69961e-05	6.276e-05	1.04404e-05	0	9.34606e-06	0	1.92621e-05	0	6.35789e-05	1.00689e-05	1.52538e-05	0	2.09894e-05	3.78835e-05	0	2.49433e-05	0	9.37761e-06	9.81133e-06	0	3.10594e-05	1.92071e-05	1.09948e-05	0	0	0	0	2.46348e-05	1.57709e-05	0
Desulfobacca	0	0	0	1.10762e-05	1.16381e-05	0	8.96572e-06	0	0	0	1.90328e-05	1.92621e-05	3.4887e-05	3.17894e-05	0	7.62689e-06	1.06459e-05	1.04947e-05	2.84126e-05	0	0	0	0	0	0	0	1.92071e-05	0	0	1.80333e-05	0	1.20849e-05	0	3.15418e-05	0
Sulfuricella	0	0	1.11215e-05	1.10762e-05	3.49142e-05	0	0	1.04404e-05	0	9.34606e-06	0	9.63104e-06	1.74435e-05	0	0	0	1.06459e-05	0	0	0	0	0	1.87552e-05	3.92453e-05	0	2.07063e-05	0	0	0	1.80333e-05	0	4.83395e-05	0	0	0
Chlorobium	0	0	0	0	0	0	0	0	0	0	0	0	6.97739e-05	1.05965e-05	0	0	0	0	0	0	0	0	0	0	0	0	0	0	0	0	0	0	0	0	1.355e-05
Chlorobaculum	0	0	0	0	0	0	0	0	0	0	0	0	3.4887e-05	0	0	0	0	0	0	0	2.49433e-05	0	0	0	0	3.10594e-05	0	0	0	0	0	0	0	0	0
Desulfosporosinus	0	0	0	0	0	0	0	0	0	2.80382e-05	0	0	0	0	0	0	0	0	0	0	0	1.43668e-05	0	9.81133e-06	0	1.03531e-05	0	0	0	0	0	0	0	0	0

## Sheet: M00616
	C0	C2	C5	C8	C11	C14	C17	MP0	MP2	MP5	MP8	MP11	MP14	MP17	EP0	EP2	EP5	EP8	EP11	EP14	EP17	PP0	PP2	PP5	PP8	PP11	PP14	PP17	BP0	BP2	BP5	BP8	BP11	BP14	BP17
Nitrospira	0.00685255	0.0189464	0.0118444	0.010622	0.02984	0.00164862	0.0318104	0.0184273	0.0140664	0.00575717	0.00914524	0.0115958	0.0116522	0.0165729	0.010814	0.0188384	0.00382187	0.0045652	0.0111756	0.00814242	0.00492629	0.00828963	0.0205557	0.0110377	0.00181285	0.00953525	0.0119756	0.00222095	0.00970583	0.0127676	0.00160006	0.0107193	0.0115784	0.00517285	0.00586713
Geobacter	0.000383979	0.00338697	0.00387028	0.00295734	0.0041897	0.000152965	0.00278834	0.00365413	0.00436138	0.00440199	0.00722293	0.01018	0.0130826	0.0147291	0.00505457	0.00906075	0.00385381	0.00389354	0.0108252	0.0101108	0.00990247	0.00139358	0.00500764	0.00614189	0.00285074	0.00863452	0.0139732	0.00818014	0.00287918	0.00440012	0.00259365	0.00924494	0.00500086	0.00559866	0.00844162
Pseudomonas	0.00939371	0.00753043	0.00344766	0.00459882	0.000174571	0.00606081	0.000618634	0.00215072	0.000929904	0.0121686	0.0038351	0.0015506	0.000156991	3.18e-05	0.0105622	0.000854212	0.0103797	0.00132234	0.00261396	0.00118798	8.73e-05	0.00546656	0.00301959	0.00151095	0.00454873	0.000207063	0.00083551	0.00358431	0.00222908	0.00187546	0.00608411	0.0145744	0.000197078	0.000346959	0.00588068
Anaeromyxobacter	0.00031506	0.000429819	0.00141243	0.000465199	0.00272331	1.69961e-05	0.0012821	0.000699505	0.00116565	0.000598148	0.00181763	0.00509482	0.00495395	0.00522406	0.00035241	0.00160927	0.00105394	0.00130134	0.00678114	0.0068157	0.00409069	0.000373536	0.00131287	0.00109887	0.000484349	0.0135937	0.00486901	0.00260577	0.00050809	0.000955764	0.000400015	0.000954706	0.00953366	0.0024918	0.00333329
Janthinobacterium	0.000541509	0.000326663	0.000266916	0.001163	0	0.0138518	0	0.000104404	1.30972e-05	0.00826191	0.00186521	9.63104e-06	0	0	0.000513512	7.62689e-06	0.00540811	0	9.47086e-06	8.67137e-06	0	0.00110624	0	0	0.000110708	0	0	0	7.81677e-05	1.80333e-05	0.0161813	0.00560739	0	0	0.00203249
Hyphomicrobium	0.000433207	0.000945602	0.000367009	0.000465199	0.00112889	0.00188657	0.00242074	0.00084567	0.00201697	0.000803761	0.0017986	0.00162765	0.00226765	0.00226765	0.000563857	0.00136521	0.00077715	0.00103898	0.00236772	0.00270547	0.00265646	0.000632138	0.00136913	0.00130491	0.00047051	0.00264005	0.00195913	0.00183613	0.00070351	0.000973798	0.000645186	0.000592159	0.00282068	0.00506245	0.00367204
Sphingomonas	0.0005612	0.00061894	0.000556075	0.000642417	0.00126855	0.00103676	0.000645531	0.000908313	0.00147999	0.000551417	0.000875507	0.00101126	0.000976835	0.00105965	0.000966612	0.00174656	0.000745212	0.000766115	0.00098497	0.00069371	0.000498865	0.000833273	0.000515768	0.00113811	0.000595057	0.000652248	0.000633835	0.000406808	0.000924985	0.000234433	0.000387112	0.00105138	0.00112088	0.000630835	0.000880747
Azotobacter	0	0.0011863	0.00252458	0.000841788	0.0021414	0.000492887	0.000797949	0	0	0.000196267	0.000437753	0.000645279	0.000436087	0.000508631	0	0	0.00150107	0.000692652	0.00209306	0.000832452	0.00124716	0	0	0.000333585	0.000581218	0.00174968	0.000480178	0.000736652	0	0	0.00086455	0.00118432	0.00139187	0.00186096	0.00172084
Bradyrhizobium	0.000255986	0.000584554	0.000322523	0.000343361	0.000814664	0.000900794	0.000986229	0.000793469	0.00104778	0.000364496	0.000837441	0.00162765	0.00158736	0.00137754	0.000573926	0.00104488	0.000745212	0.000430284	0.00124068	0.00121399	0.000972787	0.000215502	0.000890873	0.000716227	0.000221417	0.000942136	0.000960356	0.000912569	0.000390839	0.000414766	0.000322593	0.000362547	0.000739044	0.000835857	0.0010298
Ideonella	0	1.71928e-05	6.67289e-05	0.000110762	0.000290951	0	0.000170349	1.04404e-05	0.000209556	0.00819649	0.00542433	0.00103052	0.000558191	6.35789e-05	2.01377e-05	6.10151e-05	0.000457773	0.000860567	0.000710315	0.000572311	0.00143424	0	0.000112531	0.000196227	0.000359802	0.00137697	0.000124846	0.000175917	1.3028e-05	5.40999e-05	7.74224e-05	0.000616329	0.00121942	0.000441585	0.000433598
Brevundimonas	0	5.15783e-05	4.4486e-05	1.10762e-05	0.000232761	0.00584666	0.00165866	9.39634e-05	0.000288139	0.000420573	0.000837441	0.000356348	0.000191878	4.23859e-05	0.000191309	0.000144911	0.000564232	0.00188905	0.000369364	0.000294827	0.000648525	2.87336e-05	0.000243818	0.000559246	0.00123163	0.000973196	9.60356e-05	0.000428798	0.000117252	0.000234433	0.000606475	0.0011964	0.000837583	0.000835857	0.00186989
Novosphingobium	0.000196912	0.000223506	0.000266916	0.000155066	0.000581903	0.000407907	0.000331731	0.000459377	0.000510792	0.0052151	0.00120858	0.000548969	0.000732626	0.000243719	0.000422893	0.000381345	0.00117105	0.000965514	0.000388305	0.000234127	0.000112245	0.000560305	0.000506391	0.00044151	0.000359802	0.000538364	0.000201675	0.000219896	0.00070351	0.000270499	0.00154845	0.000616329	0.000763678	0.000220792	0.000298099
Massilia	8.86106e-05	0	0	2.21523e-05	0.000139657	0.0181009	0	5.22019e-05	0.000117875	1.86921e-05	4.75819e-05	9.63104e-06	0	1.05965e-05	2.01377e-05	5.33882e-05	1.06459e-05	2.09894e-05	1.89417e-05	8.67137e-06	0	7.18339e-05	1.87552e-05	9.81133e-06	1.38385e-05	1.03531e-05	3.84143e-05	1.09948e-05	0.000104224	3.60666e-05	0.000890357	0.000410886	6.1587e-05	1.57709e-05	5.41998e-05
Shewanella	9.84562e-06	0	3.33645e-05	5.53808e-05	0.000256037	0	0.000206211	0	5.23889e-05	3.73842e-05	9.51638e-06	0.000452659	0.000174435	2.1193e-05	1.00689e-05	4.57614e-05	0	0.000104947	0.000274655	0.000121399	0.000162131	0	0	0	0.000152224	0.000134591	0	0.0101042	1.3028e-05	0	0	0.000120849	0.0008499	0	1.355e-05
Comamonas	7.8765e-05	5.15783e-05	3.33645e-05	2.21523e-05	2.32761e-05	1.69961e-05	1.79314e-05	0.000135725	0.000969195	0.000224305	0.000704212	0.000452659	0.000470974	0.000116561	0.000100689	0.00428631	0.000212918	0.000241379	0.000123121	0.000182099	3.74149e-05	1.43668e-05	9.37761e-06	9.81133e-06	1.38385e-05	0	0	1.09948e-05	2.60559e-05	3.60666e-05	1.29037e-05	3.62547e-05	2.46348e-05	1.57709e-05	2.70999e-05
Aeromonas	9.84562e-06	3.43855e-05	1.11215e-05	3.32285e-05	4.65522e-05	0	0.000179314	1.04404e-05	0	4.67303e-05	0.00010468	5.77862e-05	3.4887e-05	2.1193e-05	3.02066e-05	3.81345e-05	5.32294e-05	6.29683e-05	9.47086e-06	0.000424897	9.9773e-05	2.87336e-05	9.37761e-06	1.96227e-05	0.000332125	0.000113885	2.88107e-05	0.0052995	0	0.0001082	7.74224e-05	0.000108764	0.000788313	4.73126e-05	0.0001355
Devosia	0.000196912	0.000343855	0.000155701	8.86093e-05	0.000302589	0.000220949	8.96572e-05	0.000302771	0.000419111	6.54224e-05	0.000237909	0.000346717	0.000261652	0.000158947	0.00035241	0.000381345	0.000276793	0.000136431	0.000170476	0.00019077	0.000162131	0.000287336	0.000215685	0.000618114	6.91927e-05	0.00016565	0.000153657	9.89533e-05	0.000534146	0.000126233	0.000116134	0.000217528	0.000295617	0.000331188	0.0001355
Bosea	6.89193e-05	3.43855e-05	2.2243e-05	3.32285e-05	8.14664e-05	0.000220949	1.79314e-05	0.000177486	0.000117875	0.000523379	0.000237909	0.000173359	0.000139548	3.17894e-05	0.000231584	0.000152538	0.000351314	0.000230884	8.52378e-05	8.67137e-05	4.98865e-05	0.000646505	0.000140664	0.000343396	0.000982536	0.000207063	0.000153657	8.79585e-05	0.000377811	0.000270499	0.000283882	0.000145019	0.000344887	0.00053621	0.000176149
Acinetobacter	0.000905797	0.000343855	1.11215e-05	0.00221523	6.98283e-05	0.000560872	2.68971e-05	0	3.92917e-05	3.73842e-05	3.80655e-05	0.000231145	1.74435e-05	1.05965e-05	8.0551e-05	7.62689e-06	0.000191626	1.04947e-05	0	8.67137e-06	1.24716e-05	0.00117808	9.37761e-06	9.81133e-06	0.000622734	2.07063e-05	9.60356e-06	0	0.000260559	0	0	6.04244e-05	3.69522e-05	0	2.70999e-05
Vogesella	8.86106e-05	3.43855e-05	0	7.75331e-05	9.31045e-05	5.09883e-05	5.37943e-05	0.000187927	7.85834e-05	1.86921e-05	5.70983e-05	4.81552e-05	0.000122104	4.23859e-05	0.000130895	0.00270755	0.000351314	0.000136431	0.000246242	0.000216784	7.48298e-05	8.62007e-05	0.000112531	2.9434e-05	5.53541e-05	1.03531e-05	0.000806699	0.000109948	2.60559e-05	5.40999e-05	0.00010323	0.000145019	0.000135491	4.73126e-05	0.000243899
Acidovorax	0.000334751	1.71928e-05	5.56075e-05	3.32285e-05	0	0	8.96572e-06	2.08808e-05	0.000196459	0.000121499	9.51638e-05	3.85241e-05	5.23304e-05	1.05965e-05	0.000845785	0.000396598	0.000883609	5.24736e-05	1.89417e-05	0.000112728	6.23581e-05	0.00107751	9.37761e-05	9.81133e-06	5.53541e-05	2.07063e-05	0	0.000120943	0.000547174	0.000126233	0.000180652	7.25093e-05	9.85392e-05	1.57709e-05	2.70999e-05
Cupriavidus	5.90737e-05	6.87711e-05	0.000122336	4.43046e-05	0.000267675	0.000118973	0.000107589	0.000198367	0.000222653	6.54224e-05	7.6131e-05	0.00018299	0.000156991	0.000190737	0.000100689	0.000648286	0.000223564	0.000157421	0.000255713	0.000277484	0.000112245	7.18339e-05	9.37761e-05	0.000137359	8.30312e-05	0.000269182	0.000172864	0.000109948	6.51398e-05	0.000126233	5.16149e-05	0.000145019	0.000295617	0.000110396	8.12997e-05
Lysobacter	9.84562e-05	0.000154735	7.78504e-05	0.000110762	0.000174571	0.000237946	0.000170349	0.000261009	0.00037982	2.80382e-05	0.000133229	0.000115572	0.000191878	0.000413263	0.000171171	0.000312703	9.5813e-05	8.39578e-05	0.000170476	7.80424e-05	4.98865e-05	0.000244235	0.000121909	0.000274717	4.15156e-05	0.000124238	0.000201675	4.39792e-05	0.000182391	7.21332e-05	5.16149e-05	0.000193358	0.000184761	3.15418e-05	9.48497e-05
Caulobacter	0.000108302	5.15783e-05	2.2243e-05	2.21523e-05	0.000116381	0.000577868	0.000134486	9.39634e-05	0.000340528	0.000130845	0.000275975	0.000250407	5.23304e-05	0	0.00027186	4.57614e-05	0.000127751	0	2.84126e-05	8.67137e-06	1.24716e-05	0.000488471	0.000159419	0.000274717	0.000124547	2.07063e-05	1.92071e-05	1.09948e-05	0.000299643	9.01664e-05	6.45186e-05	6.04244e-05	2.46348e-05	0.000520439	0
Desulfuromonas	0	0	3.33645e-05	4.43046e-05	8.14664e-05	0	1.79314e-05	3.13211e-05	2.61945e-05	5.60763e-05	7.6131e-05	0.000202252	0.000261652	0.000275508	4.02755e-05	7.62689e-05	8.51671e-05	4.19789e-05	0.000198888	0.00025147	0.000112245	1.43668e-05	4.6888e-05	5.8868e-05	4.15156e-05	0.000279535	0.000307314	0.000230891	0	1.80333e-05	0	0.000145019	0.000135491	9.46253e-05	0.000311649
Xanthobacter	0	0	0	0	0	0	0	0	1.30972e-05	8.41145e-05	0.000152262	0.000327455	0.0004012	9.53683e-05	0	0	3.19377e-05	4.19789e-05	2.84126e-05	0.00019077	3.74149e-05	1.43668e-05	0	7.84906e-05	0.000304448	0.000424479	0.000364935	0.000175917	0	0	0.00010323	3.62547e-05	0.000443426	0.000126167	5.41998e-05
Ancylobacter	0	0	0	0	2.32761e-05	1.69961e-05	1.79314e-05	0	1.30972e-05	2.80382e-05	9.51638e-06	0.000337086	5.23304e-05	0	1.00689e-05	7.62689e-06	0	0	2.84126e-05	5.20282e-05	7.48298e-05	0	0	0	5.53541e-05	0.00128379	0.000124846	4.39792e-05	2.60559e-05	0	1.29037e-05	7.25093e-05	0.000874535	9.46253e-05	8.12997e-05
Rhizobacter	6.89193e-05	5.15783e-05	8.89719e-05	2.21523e-05	0.000116381	0	9.86229e-05	0.000135725	0.000222653	3.73842e-05	2.85491e-05	6.74172e-05	5.23304e-05	4.23859e-05	0.000191309	0.000129657	7.45212e-05	0.000104947	4.73543e-05	9.53851e-05	6.23581e-05	0.000215502	7.50209e-05	6.86793e-05	5.53541e-05	8.28252e-05	6.7225e-05	3.29844e-05	0.000260559	0.000234433	1.29037e-05	7.25093e-05	4.92696e-05	0.000315418	5.41998e-05
Methylomonas	0	1.71928e-05	0	1.10762e-05	0	0	2.68971e-05	1.04404e-05	1.30972e-05	9.34606e-06	2.85491e-05	1.92621e-05	6.97739e-05	5.29824e-05	3.02066e-05	1.52538e-05	1.06459e-05	2.09894e-05	0.000255713	0.000702381	0.000773241	1.43668e-05	9.37761e-06	0	1.38385e-05	0.000124238	0.000153657	3.29844e-05	2.60559e-05	1.80333e-05	1.29037e-05	0	4.92696e-05	0.000488897	0.000230349
Mesorhizobium	4.92281e-05	3.43855e-05	6.67289e-05	8.86093e-05	0.000104743	0.000220949	6.276e-05	0.000114844	0.000183361	4.67303e-05	5.70983e-05	0.000202252	0.000122104	0.000148351	0.000110758	0.000198299	8.51671e-05	0.000115442	0.000123121	7.80424e-05	7.48298e-05	0.000129301	0.000140664	6.86793e-05	0	0.000144944	2.88107e-05	4.39792e-05	3.90839e-05	5.40999e-05	2.58075e-05	3.62547e-05	7.39044e-05	7.88544e-05	4.06499e-05
Labrys	9.84562e-06	8.59638e-05	5.56075e-05	3.32285e-05	3.49142e-05	6.79844e-05	6.276e-05	0.000135725	9.16806e-05	9.34606e-06	3.80655e-05	0.000144466	0.000104661	0.000169544	8.0551e-05	0.000198299	3.19377e-05	3.14842e-05	5.68252e-05	4.33569e-05	6.23581e-05	5.74671e-05	7.50209e-05	0.000117736	2.76771e-05	6.21189e-05	5.76214e-05	6.59689e-05	5.21118e-05	5.40999e-05	2.58075e-05	4.83395e-05	6.1587e-05	7.88544e-05	0.0001084
Methylocystis	0	3.43855e-05	3.33645e-05	1.10762e-05	3.49142e-05	0	0	0	1.30972e-05	0	0	6.74172e-05	6.97739e-05	4.23859e-05	0	3.81345e-05	2.12918e-05	4.19789e-05	0.000161005	0.000225456	0.000586166	0	2.81328e-05	0	0	8.28252e-05	0.000230486	0.000142933	0	0	1.29037e-05	1.20849e-05	4.92696e-05	0.000189251	0.000162599
Variovorax	4.92281e-05	5.15783e-05	5.56075e-05	3.32285e-05	6.98283e-05	8.49805e-05	3.58629e-05	0.000114844	1.30972e-05	4.67303e-05	4.75819e-05	4.81552e-05	1.74435e-05	1.05965e-05	0.000100689	0.00012203	0.000159688	3.14842e-05	9.47086e-05	4.33569e-05	4.98865e-05	0.000158035	4.6888e-05	0.000166793	2.76771e-05	2.07063e-05	9.60356e-06	0	0.00013028	5.40999e-05	2.58075e-05	0	3.69522e-05	3.15418e-05	1.355e-05
Steroidobacter	9.84562e-06	1.71928e-05	0.000155701	0	6.98283e-05	3.39922e-05	1.79314e-05	3.13211e-05	1.30972e-05	1.86921e-05	5.70983e-05	0.000173359	8.72174e-05	5.29824e-05	2.01377e-05	5.33882e-05	2.12918e-05	3.14842e-05	3.78835e-05	4.33569e-05	1.24716e-05	1.43668e-05	9.37761e-05	7.84906e-05	0	4.14126e-05	9.60356e-05	1.09948e-05	5.21118e-05	7.21332e-05	2.58075e-05	8.45942e-05	0.000197078	6.30835e-05	5.41998e-05
Cellvibrio	2.95369e-05	3.43855e-05	5.56075e-05	2.21523e-05	3.49142e-05	0	0.000555874	6.26423e-05	0.000275042	9.34606e-06	0	9.63104e-06	1.74435e-05	0	6.04132e-05	3.05076e-05	0	0	2.84126e-05	0	0	5.74671e-05	8.43985e-05	9.81133e-06	0	0	9.60356e-06	2.19896e-05	7.81677e-05	1.80333e-05	0	1.20849e-05	1.23174e-05	0	2.70999e-05
Pseudoxanthomonas	9.84562e-06	6.87711e-05	7.78504e-05	4.43046e-05	8.14664e-05	1.69961e-05	1.79314e-05	5.22019e-05	5.23889e-05	3.73842e-05	2.85491e-05	1.92621e-05	0	3.17894e-05	5.03444e-05	9.15227e-05	4.25835e-05	2.09894e-05	1.89417e-05	1.73427e-05	1.24716e-05	5.74671e-05	2.81328e-05	2.9434e-05	1.38385e-05	3.10594e-05	9.60356e-06	1.09948e-05	6.51398e-05	1.80333e-05	1.29037e-05	7.25093e-05	6.1587e-05	0.000205021	1.355e-05
Tolumonas	0	0	1.11215e-05	0	0	0	8.96572e-06	4.17615e-05	1.30972e-05	0.00066357	9.51638e-06	9.63104e-06	0	1.05965e-05	2.01377e-05	2.28807e-05	1.06459e-05	0	0	0	0	0	0	0	1.38385e-05	0	9.60356e-06	0	2.60559e-05	0	7.74224e-05	1.20849e-05	0	0	0
Paraburkholderia	0	0	1.11215e-05	0	5.81903e-05	5.09883e-05	8.96572e-06	5.22019e-05	5.23889e-05	9.34606e-06	1.90328e-05	1.92621e-05	5.23304e-05	3.17894e-05	6.04132e-05	6.8642e-05	4.25835e-05	2.09894e-05	9.47086e-06	1.73427e-05	1.24716e-05	2.87336e-05	0	9.81133e-06	0	3.10594e-05	0	0	2.60559e-05	0	1.29037e-05	1.20849e-05	9.85392e-05	1.57709e-05	0
Nitrosomonas	0	3.43855e-05	1.11215e-05	0	4.65522e-05	0	0	1.04404e-05	6.54862e-05	2.80382e-05	9.51638e-06	1.92621e-05	3.4887e-05	5.29824e-05	3.02066e-05	0.00012203	0	0	9.47086e-06	2.60141e-05	2.49433e-05	2.87336e-05	6.56433e-05	1.96227e-05	0	1.03531e-05	9.60356e-06	1.09948e-05	1.3028e-05	5.40999e-05	1.29037e-05	1.20849e-05	2.46348e-05	1.57709e-05	0
Skermanella	0	3.43855e-05	0	0	0	6.79844e-05	5.37943e-05	0	0	5.60763e-05	4.75819e-05	1.92621e-05	3.4887e-05	1.05965e-05	0	0	2.12918e-05	1.04947e-05	3.78835e-05	8.67137e-06	0	0	9.37761e-06	9.81133e-06	0	1.03531e-05	1.92071e-05	6.59689e-05	1.3028e-05	9.01664e-05	3.87112e-05	0	0	3.15418e-05	6.77498e-05
Dokdonella	1.96912e-05	0	2.2243e-05	1.10762e-05	3.49142e-05	0	8.96572e-06	4.17615e-05	9.16806e-05	9.34606e-06	9.51638e-06	4.81552e-05	1.74435e-05	1.05965e-05	4.02755e-05	4.57614e-05	3.19377e-05	1.04947e-05	2.84126e-05	8.67137e-06	0	4.31004e-05	2.81328e-05	9.81133e-06	2.76771e-05	2.07063e-05	2.88107e-05	0	3.90839e-05	1.80333e-05	0	0	0	0	0
Magnetospirillum	0	0	5.56075e-05	0	1.16381e-05	0	8.96572e-06	0	9.16806e-05	6.54224e-05	2.85491e-05	9.63104e-05	0	2.1193e-05	0	2.28807e-05	0	0	2.84126e-05	2.60141e-05	3.74149e-05	0	9.37761e-06	9.81133e-06	0	1.03531e-05	0	0	0	0	0	1.20849e-05	3.69522e-05	0	4.06499e-05
Caballeronia	9.84562e-06	1.71928e-05	2.2243e-05	0	3.49142e-05	0	1.79314e-05	2.08808e-05	2.61945e-05	2.80382e-05	9.51638e-06	1.92621e-05	0	1.05965e-05	1.00689e-05	9.91496e-05	2.12918e-05	4.19789e-05	9.47086e-06	8.67137e-06	0	0	9.37761e-06	0	1.38385e-05	2.07063e-05	1.92071e-05	0	2.60559e-05	1.80333e-05	1.29037e-05	1.20849e-05	3.69522e-05	1.57709e-05	0
Niveispirillum	0	1.71928e-05	1.11215e-05	0	0	0	0	0	1.30972e-05	0	0	0	0	0	0	7.62689e-06	2.12918e-05	0	9.47086e-06	0	1.24716e-05	0	2.81328e-05	0	0	3.10594e-05	9.60356e-06	1.09948e-05	0	1.80333e-05	0	0.000132934	0	0.000205021	5.41998e-05
Methylobacter	0	0	0	0	1.16381e-05	0	0	1.04404e-05	0	0	1.90328e-05	0.000173359	0.000122104	1.05965e-05	0	0	0	1.04947e-05	9.47086e-06	8.67137e-06	3.74149e-05	0	0	0	2.76771e-05	2.07063e-05	1.92071e-05	1.09948e-05	0	0	0	1.20849e-05	1.23174e-05	0	0
Methylobacterium	0	0	0	0	4.65522e-05	1.69961e-05	8.96572e-06	0	1.30972e-05	0	9.51638e-06	9.63104e-06	0	0	2.01377e-05	0	0	0	0	0	1.24716e-05	0	1.87552e-05	9.81133e-06	8.30312e-05	1.03531e-05	0	0	3.90839e-05	0	1.29037e-05	8.45942e-05	3.69522e-05	0	4.06499e-05
Methylococcus	0	0	0	0	0	0	0	0	0	0	0	1.92621e-05	0	4.23859e-05	0	0	0	0	2.84126e-05	6.9371e-05	0.00014966	0	0	0	0	0	1.92071e-05	6.59689e-05	0	0	1.29037e-05	0	0	0	5.41998e-05
Pseudorhodoplanes	0	0	1.11215e-05	0	0	0	1.79314e-05	0	0	9.34606e-06	9.51638e-06	2.88931e-05	0	1.05965e-05	0	2.28807e-05	2.12918e-05	0	1.89417e-05	1.73427e-05	2.49433e-05	0	2.81328e-05	9.81133e-06	0	0	9.60356e-06	4.39792e-05	0	1.80333e-05	0	0	4.92696e-05	4.73126e-05	2.70999e-05
Pseudogulbenkiania	0	0	1.11215e-05	1.10762e-05	0	0	0	7.30826e-05	1.30972e-05	9.34606e-06	0	0	0	1.05965e-05	2.01377e-05	6.10151e-05	1.06459e-05	0	9.47086e-06	0	0	1.43668e-05	9.37761e-06	0	2.76771e-05	1.03531e-05	9.60356e-06	0	1.3028e-05	0	1.29037e-05	2.41698e-05	0	0	1.355e-05
Methylovulum	0	0	0	0	0	0	0	0	0	0	0	0	0	0	0	0	0	0	1.89417e-05	8.67137e-05	0.000236961	0	0	0	0	0	0	0	0	0	0	0	0	0	0
Dyella	0	1.71928e-05	1.11215e-05	1.10762e-05	0	0	8.96572e-06	2.08808e-05	2.61945e-05	0	1.90328e-05	2.88931e-05	0	1.05965e-05	5.03444e-05	1.52538e-05	1.06459e-05	0	9.47086e-06	0	0	1.43668e-05	9.37761e-06	9.81133e-06	0	0	0	0	1.3028e-05	1.80333e-05	0	2.41698e-05	0	0	0
Shinella	0	0	0	1.10762e-05	0	1.69961e-05	8.96572e-06	2.08808e-05	5.23889e-05	0	2.85491e-05	0	0	1.05965e-05	1.00689e-05	3.05076e-05	1.06459e-05	0	9.47086e-06	1.73427e-05	1.24716e-05	0	9.37761e-06	1.96227e-05	0	0	0	0	2.60559e-05	0	0	0	0	3.15418e-05	0
Asticcacaulis	1.96912e-05	0	0	0	1.16381e-05	0	0	1.04404e-05	0	0	0	3.85241e-05	1.74435e-05	0	3.02066e-05	1.52538e-05	1.06459e-05	0	0	1.73427e-05	1.24716e-05	4.31004e-05	1.87552e-05	0	1.38385e-05	1.03531e-05	9.60356e-06	1.09948e-05	2.60559e-05	0	0	0	0	0	0
Beijerinckia	1.96912e-05	1.71928e-05	2.2243e-05	0	0	0	8.96572e-06	3.13211e-05	1.30972e-05	9.34606e-06	9.51638e-06	9.63104e-06	3.4887e-05	0	0	0	0	0	0	0	2.49433e-05	0	0	1.96227e-05	0	2.07063e-05	1.92071e-05	1.09948e-05	0	0	0	0	0	0	1.355e-05
Afipia	0	1.71928e-05	0	2.21523e-05	1.16381e-05	3.39922e-05	8.96572e-06	2.08808e-05	0	1.86921e-05	0	2.88931e-05	1.74435e-05	0	1.00689e-05	7.62689e-06	0	2.09894e-05	0	0	0	0	9.37761e-06	1.96227e-05	0	0	0	1.09948e-05	0	0	0	0	1.23174e-05	0	0
Achromobacter	0	0	0	0	0	0	8.96572e-06	0	0	0	0	2.88931e-05	0	2.1193e-05	0	1.52538e-05	3.19377e-05	0	9.47086e-06	0	0	0	1.87552e-05	0	1.38385e-05	1.03531e-05	2.88107e-05	0	0	1.80333e-05	0	2.41698e-05	2.46348e-05	1.57709e-05	0
Thermomonas	9.84562e-06	0	1.11215e-05	1.10762e-05	1.16381e-05	1.69961e-05	2.68971e-05	1.04404e-05	0	0	9.51638e-06	0	0	0	1.00689e-05	7.62689e-06	0	0	9.47086e-06	0	0	1.43668e-05	0	0	0	0	9.60356e-06	0	1.3028e-05	0	0	2.41698e-05	0	0	0
Burkholderia	0	0	0	0	4.65522e-05	0	8.96572e-06	2.08808e-05	2.61945e-05	0	0	9.63104e-06	0	0	1.00689e-05	0	0	1.04947e-05	0	0	0	0	9.37761e-06	9.81133e-06	0	0	0	0	1.3028e-05	1.80333e-05	0	1.20849e-05	0	0	0
Stenotrophomonas	9.84562e-06	1.71928e-05	2.2243e-05	2.21523e-05	1.16381e-05	0	0	0	2.61945e-05	0	9.51638e-06	0	0	0	0	7.62689e-06	0	0	0	8.67137e-06	0	0	0	9.81133e-06	0	0	0	0	2.60559e-05	0	0	2.41698e-05	0	0	0
Immundisolibacter	0	0	2.2243e-05	0	5.81903e-05	0	1.79314e-05	0	0	9.34606e-06	0	9.63104e-06	1.74435e-05	0	0	0	0	0	0	0	0	0	0	0	0	0	0	0	2.60559e-05	0	0	0	0	0	0
Phreatobacter	9.84562e-06	0	0	0	0	0	8.96572e-06	0	1.30972e-05	2.80382e-05	2.85491e-05	9.63104e-06	0	0	0	0	0	0	0	0	0	0	1.87552e-05	0	1.38385e-05	0	9.60356e-06	0	0	0	0	0	0	0	0
Nitrosospira	0	0	1.11215e-05	0	1.16381e-05	1.69961e-05	8.96572e-06	0	2.61945e-05	0	9.51638e-06	0	0	2.1193e-05	0	1.52538e-05	0	0	0	0	0	0	0	0	0	0	9.60356e-06	0	0	0	0	0	0	0	0
Marinobacter	0	0	0	0	0	0	0	0	0	0	0	0	0	0	0	0	0	0	0	0	0	0	9.37761e-05	0	0	0	0	0	0	1.80333e-05	0	0	0	0	0
Rhodanobacter	0	0	0	0	1.16381e-05	5.09883e-05	0	0	1.30972e-05	0	0	0	0	0	0	0	0	0	0	0	0	0	9.37761e-06	0	0	0	0	0	1.3028e-05	0	0	0	0	0	0
Plesiomonas	9.84562e-06	0	0	0	0	0	0	0	0	0	0	0	0	0	0	3.81345e-05	0	0	0	0	0	0	0	0	0	0	0	4.39792e-05	0	0	0	0	0	0	0
Methylorubrum	0	0	0	0	1.16381e-05	0	0	1.04404e-05	0	0	0	0	0	0	0	0	1.06459e-05	0	0	8.67137e-06	0	0	0	0	0	0	9.60356e-06	0	0	1.80333e-05	0	1.20849e-05	0	0	0
Aminobacter	0	1.71928e-05	0	0	0	0	0	2.08808e-05	0	0	0	9.63104e-06	0	0	0	0	0	0	0	0	0	0	0	0	0	0	0	0	0	0	0	0	0	3.15418e-05	0
Xanthomonas	0	0	0	0	1.16381e-05	0	0	0	0	0	0	9.63104e-06	0	0	0	7.62689e-06	0	0	1.89417e-05	0	0	0	0	0	0	1.03531e-05	0	0	0	1.80333e-05	0	0	0	0	0
Myxococcus	0	0	0	0	0	1.69961e-05	0	0	0	0	0	0	0	0	0	0	0	0	0	0	0	0	0	9.81133e-06	0	0	0	0	1.3028e-05	0	0	1.20849e-05	1.23174e-05	0	0
Paracoccus	0	0	0	0	1.16381e-05	0	0	0	0	0	0	0	0	0	0	7.62689e-06	0	0	0	0	0	0	0	0	1.38385e-05	0	0	0	0	0	0	0	0	1.57709e-05	1.355e-05
Alcanivorax	0	0	0	1.10762e-05	1.16381e-05	0	8.96572e-06	0	1.30972e-05	0	0	0	0	0	0	0	0	0	0	0	0	0	0	0	0	0	0	0	0	0	0	0	0	0	0
Rhodopseudomonas	0	0	0	1.10762e-05	0	0	0	0	0	0	0	0	0	1.05965e-05	0	7.62689e-06	0	0	0	0	0	0	0	0	0	0	0	0	0	0	0	0	1.23174e-05	0	0
Sulfurospirillum	0	0	0	0	0	0	0	0	0	0	0	1.92621e-05	0	0	0	0	0	0	0	0	0	0	0	0	0	0	0	0	0	1.80333e-05	0	0	0	0	0
Archangium	0	0	0	0	0	0	0	0	0	0	0	9.63104e-06	1.74435e-05	0	0	0	0	0	0	0	0	0	9.37761e-06	0	0	0	0	0	0	0	0	0	0	0	0
Solimonas	0	0	0	0	1.16381e-05	0	0	0	0	0	0	0	0	0	0	0	0	0	0	0	0	0	0	0	0	0	0	0	0	0	0	1.20849e-05	1.23174e-05	0	0
Methyloceanibacter	0	0	0	0	0	0	0	0	0	0	0	0	0	0	0	0	0	1.04947e-05	9.47086e-06	0	0	0	0	0	0	1.03531e-05	0	0	0	0	0	0	0	0	0
Delftia	9.84562e-06	0	0	0	0	0	0	0	0	0	0	0	0	0	0	7.62689e-06	0	0	0	0	0	0	0	0	0	0	0	0	0	0	0	1.20849e-05	0	0	0
Brucella	0	0	0	0	0	0	0	0	0	0	0	9.63104e-06	0	0	0	7.62689e-06	0	1.04947e-05	0	0	0	0	0	0	0	0	0	0	0	0	0	0	0	0	0
Cystobacter	0	0	0	0	1.16381e-05	0	0	0	0	0	0	9.63104e-06	0	0	0	0	0	0	0	0	0	0	0	0	0	0	0	0	0	0	0	0	0	0	0
Methylocella	0	0	0	0	0	0	0	0	0	0	0	0	0	0	0	0	0	0	0	0	0	0	0	0	0	0	0	0	1.3028e-05	0	0	0	0	0	0
Pandoraea	0	0	0	0	0	0	0	0	0	0	0	0	0	1.05965e-05	0	0	0	0	0	0	0	0	0	0	0	0	0	0	0	0	0	0	0	0	0
Nitrobacter	0	0	0	0	0	0	0	1.04404e-05	0	0	0	0	0	0	0	0	0	0	0	0	0	0	0	0	0	0	0	0	0	0	0	0	0	0	0
Methylocaldum	0	0	0	0	0	0	0	0	0	0	0	0	0	0	0	7.62689e-06	0	0	0	0	0	0	0	0	0	0	0	0	0	0	0	0	0	0	0
	0.0213266	0.0359673	0.0264247	0.025566	0.0460983	0.05314	0.0456982	0.0307051	0.0305427	0.0495808	0.0381321	0.0399495	0.0398932	0.0443781	0.0333984	0.0458224	0.0340775	0.0195936	0.0423253	0.0366019	0.0298695	0.0240141	0.0355599	0.0270695	0.0169619	0.0447566	0.0394034	0.0384159	0.0217971	0.0241285	0.0336078	0.0494997	0.0407583	0.0273625	0.0379534
	0.0213266	0.0359673	0.0264247	0.025566	0.0460983	0.05314	0.0456982	0.0307051	0.0305427	0.0495808	0.0381321	0.0399495	0.0398932	0.0443781	0.0333984	0.0458224	0.0340775	0.0195936	0.0423253	0.0366019	0.0298695	0.0240141	0.0355599	0.0270695	0.0169619	0.0447566	0.0394034	0.0384159	0.0217971	0.0241285	0.0336078	0.0494997	0.0407583	0.0273625	0.0379534

[truncated: 2 more sheets: Xenobiotics, Pathogen]
